# Supplementary material for: The impact of the timely birth-dose vaccine on the global elimination of hepatitis B
Source: Research Square preprint supplement (doi:10.21203/rs.3.rs-370018/v1), 2021-04-19
Supplement: Supplementary file 1 [file 79a545cef8ce0681b7ec82bf.docx]

Supplementary information

# Countries included in the modelling

The 110 low and middle-income countries modelled (Fig. S1) together represent all six WHO regions and include all current GAVI-eligible countries. All low-income and lower-middle income countries are included in the modelling (<https://datahelpdesk.worldbank.org/knowledgebase/articles/906519-world-bank-country-and-lending-groups>, accessed in December 2020), and the 110 modelled countries together contain 92% of global HBsAg prevalent cases (Table S2; <http://whohbsagdashboard.com/#hbv-country-profiles>, accessed in January 2021). Within all six WHO regions, the modelled countries together contain a higher HBsAg prevalence than do the excluded countries. However, EURO and PAHO each contain several high-income countries (HICs). Even though these HICs tend to have low HBsAg prevalences, their combined population sizes within each region results in the HICs containing over 50% of HBsAg prevalent cases in EURO and PAHO, making model outputs for these two WHO regions less complete than for AFRO, EMRO, SEARO and WPRO.

# The HBV model

The model1,2 is partitioned into acute states and chronic states, with the acute part containing the Severe Acute and Non-severe acute states, and the chronic part containing the states Immune Tolerant, Immune Reactive, Asymptomatic Carrier, HBeAg negative Chronic HBV, Compensated Cirrhosis, Decompensated Cirrhosis and Liver Cancer. Individuals in the Immune Tolerant and the Immune Reactive states are HBsAg+ HBeAg+ and are considered to be 15 times more infectious for horizontal transmission than the individuals in the other disease states, who are HBsAg+ HBeAg-. The Immune Reactive, HBeAg negative Chronic HBV, Compensated Cirrhosis and Decompensated Cirrhosis states constitute the population of HBV-infected individuals considered eligible for antiviral treatment. HBV-related deaths can occur from the Severe Acute, Compensated Cirrhosis, Decompensated Cirrhosis and Liver Cancer states.

# Modelling treatment

Numbers of individuals on antiviral treatment in the countries in 2016 were obtained from the Polaris Observatory3, with countries not listed in this source assumed not to have introduced antiviral treatment by 2016. Treatment was initiated in the simulations in the year 2016 in each country, and the rate of treatment-eligible individuals moved to treatment was maintained at a constant rate until 2100, the last year of the simulations in each country. Treatment levels varied within a country across the 200 particles, ranging from a level that achieves the same treatment coverage amongst treatment-eligible individuals in the years 2016 and 2030 to a level that achieves 40% treatment coverage amongst treatment-eligible individuals in the year 2030. HBsAg positive individuals were considered eligible for antiviral treatment if they are in the Immune Reactive, HBeAg negative chronic HBV, Compensated Cirrhosis or Decompensated Cirrhosis disease states of HBV. The upper level of 40% treatment coverage amongst treatment-eligible individuals in 2030 was considered a reasonable upper limit, since most countries currently have very low levels of treatment4 and are therefore unlikely to reach the WHO goal of 80% coverage amongst treatment-eligible individuals by 20305. The results of these analyses are mostly shown in the main text of the manuscript, whereas the results of sensitivity analyses involving higher levels of treatment are provided in Tables S3 to S6 in the supplementary materials.

# Additional Figures and Tables


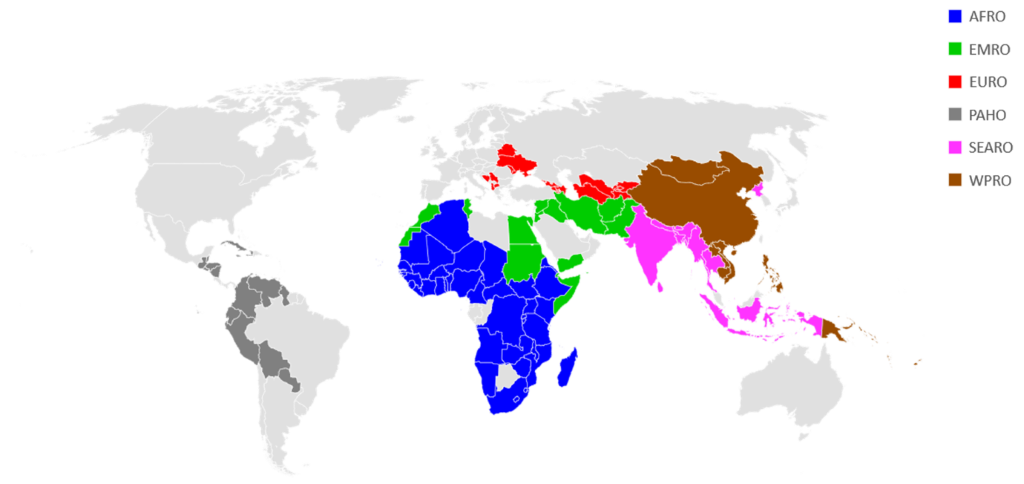
Fig. S1: Map of the 110 low to middle income countries included in the study and their assignment to each of the six WHO regions6.


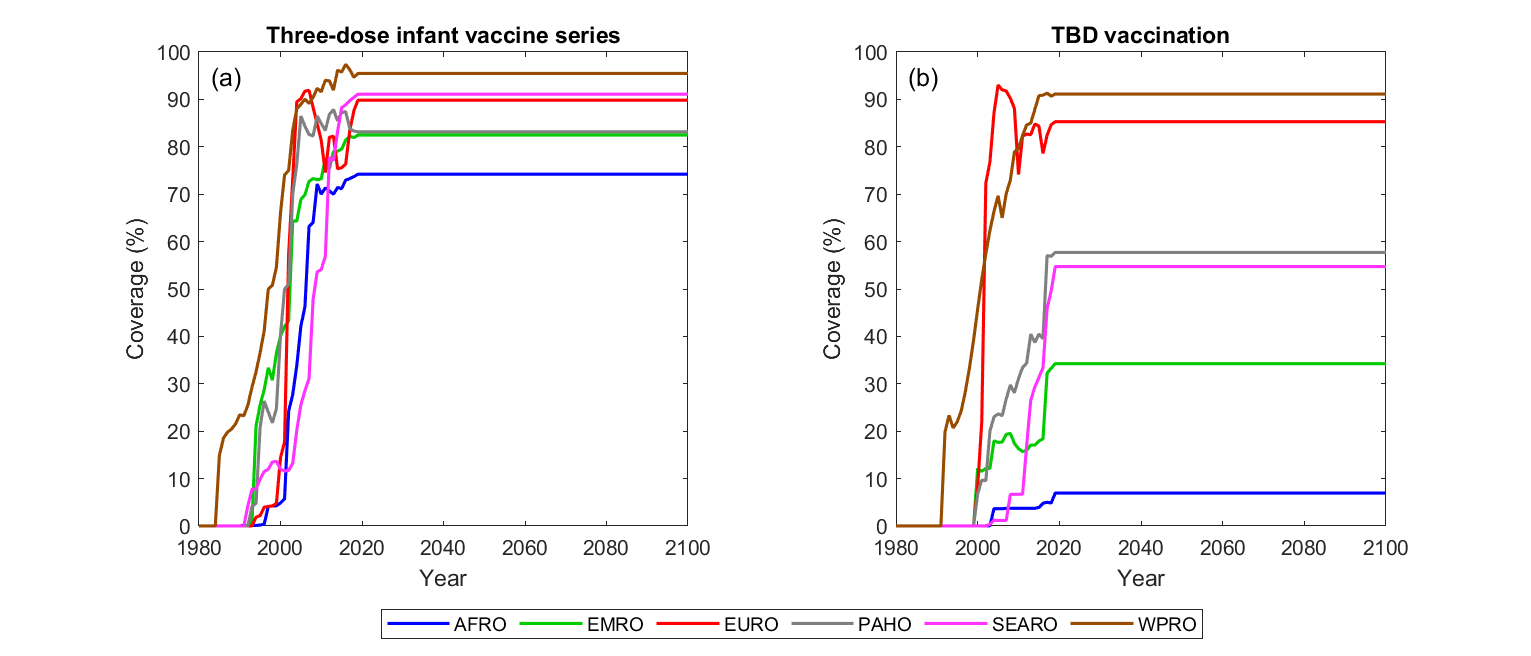


Fig. S2: (a) Overall infant HBV vaccine coverage and (b) Overall TBD vaccination coverage in the status quo scenario (scenario 1) within the populations of each of the WHO regions. HBV: hepatitis B; TBD: timely birth dose; WHO: World Health Organization.


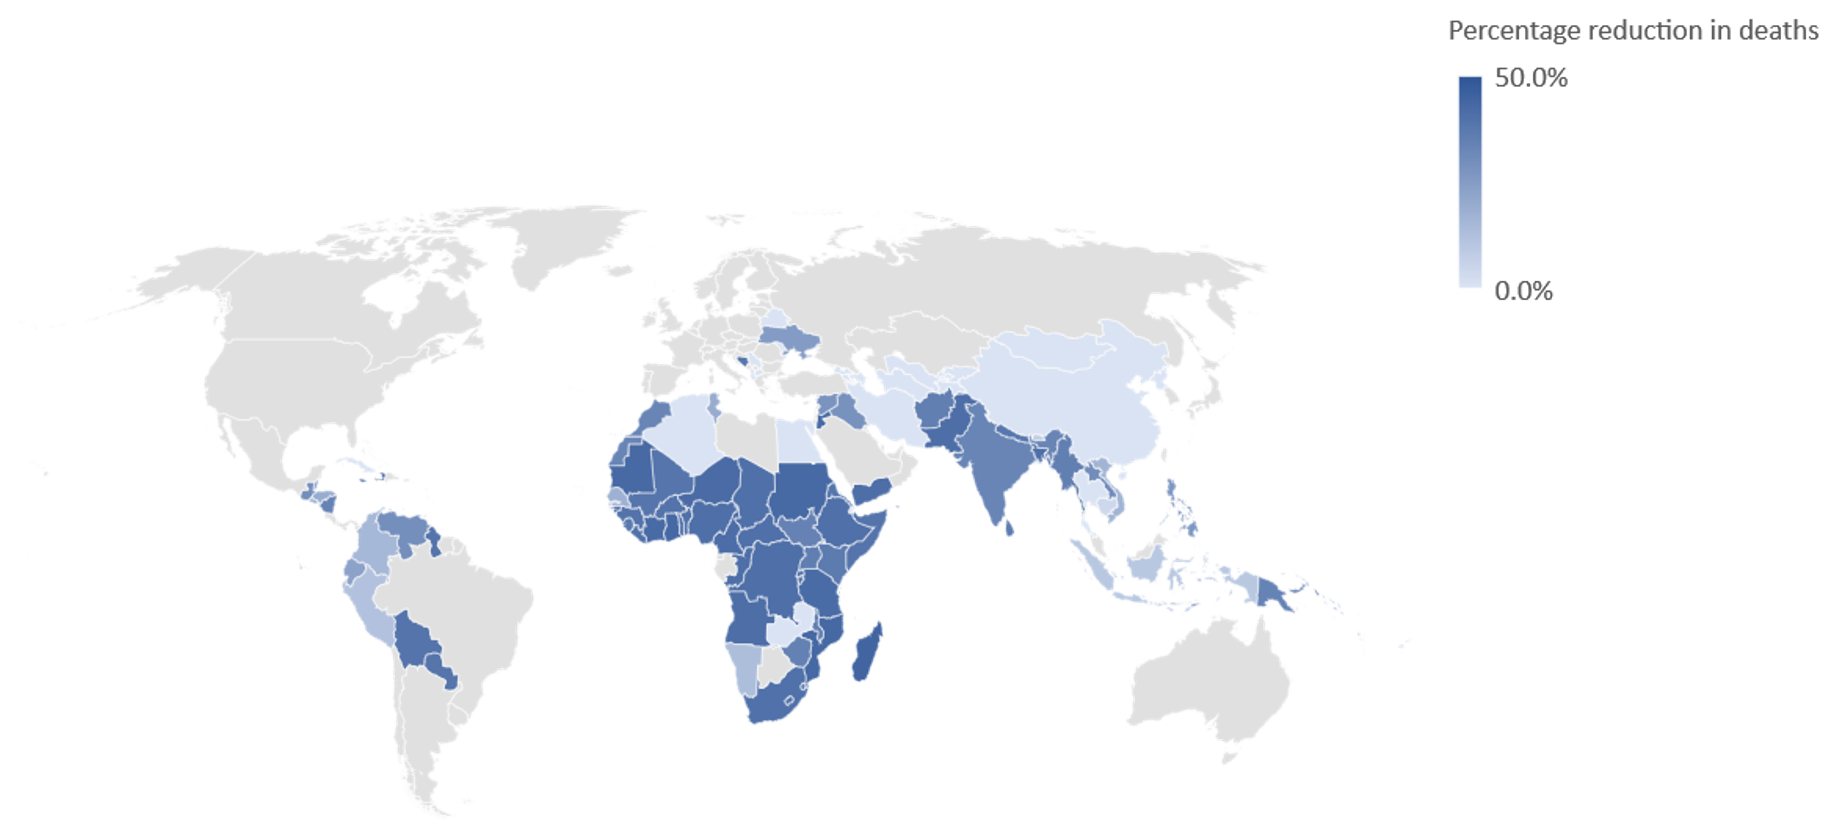


Fig. S3: Percentage reduction of mean HBV-related deaths averted in the 2020 to 2030 birth cohorts in each country if TBD coverage is scaled up to ≥90% by 2030 (scenario 2) relative to the status quo scenario (scenario 1). HBV: hepatitis B; TBD: timely birth dose.


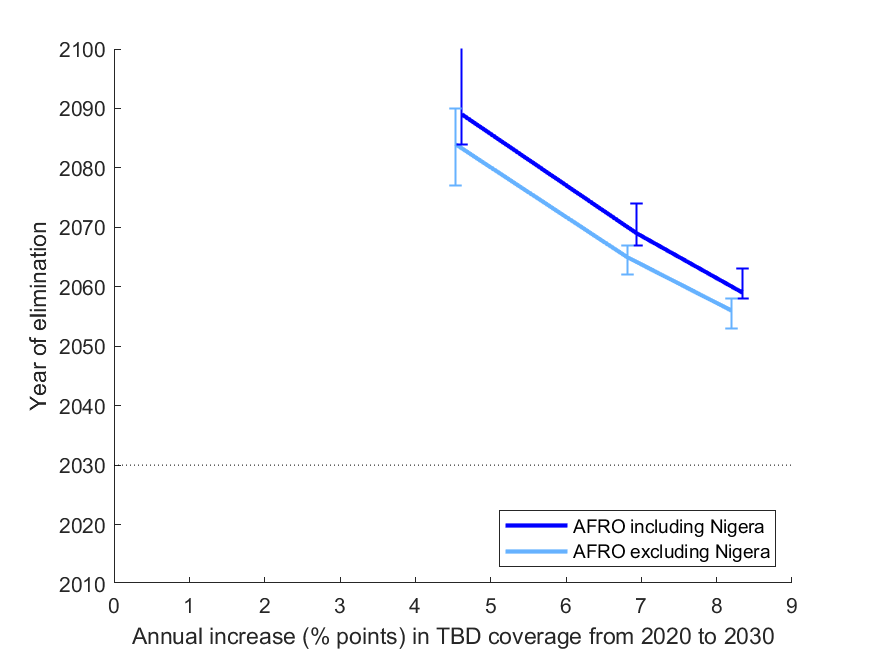


Fig. S4: Year of elimination (median and 95% credibility intervals) for different rates of annual scale-up of TBD coverage in AFRO, with Nigeria included (blue line) and Nigeria excluded (light-blue line). At annual increases in TBD coverage less than 3%, elimination did not occur before 2100. The dotted line at the year 2030 is for reference purposes only. TBD: timely birth dose.


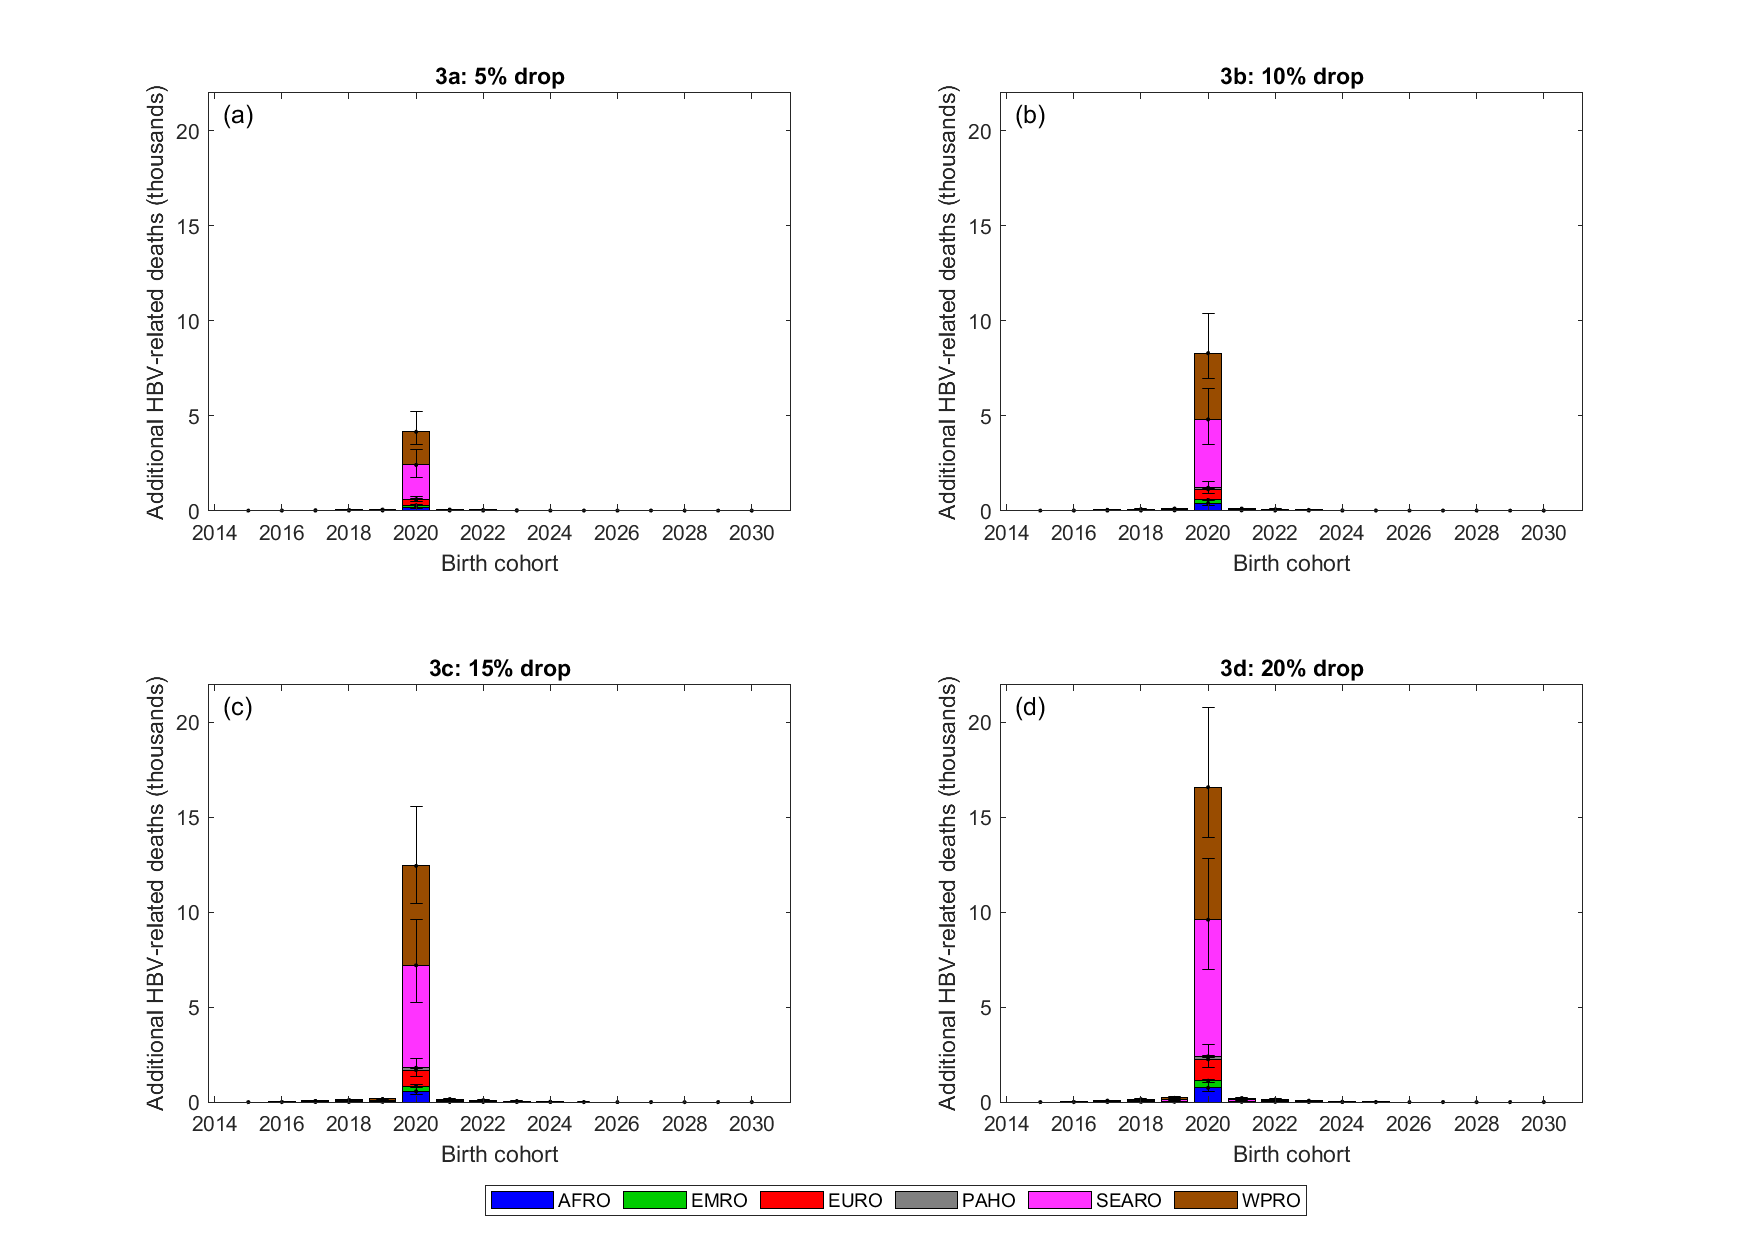


Fig. S5: Additional HBV-related deaths (mean and 95% credibility intervals) in the 2015 to 2030 birth cohorts due to a drop in the percentage of new-borns receiving TBD in 2020 (scenarios 3a to 3d) relative to the status quo scenario (scenario 1). HBV: hepatitis B; TBD: timely birth dose.


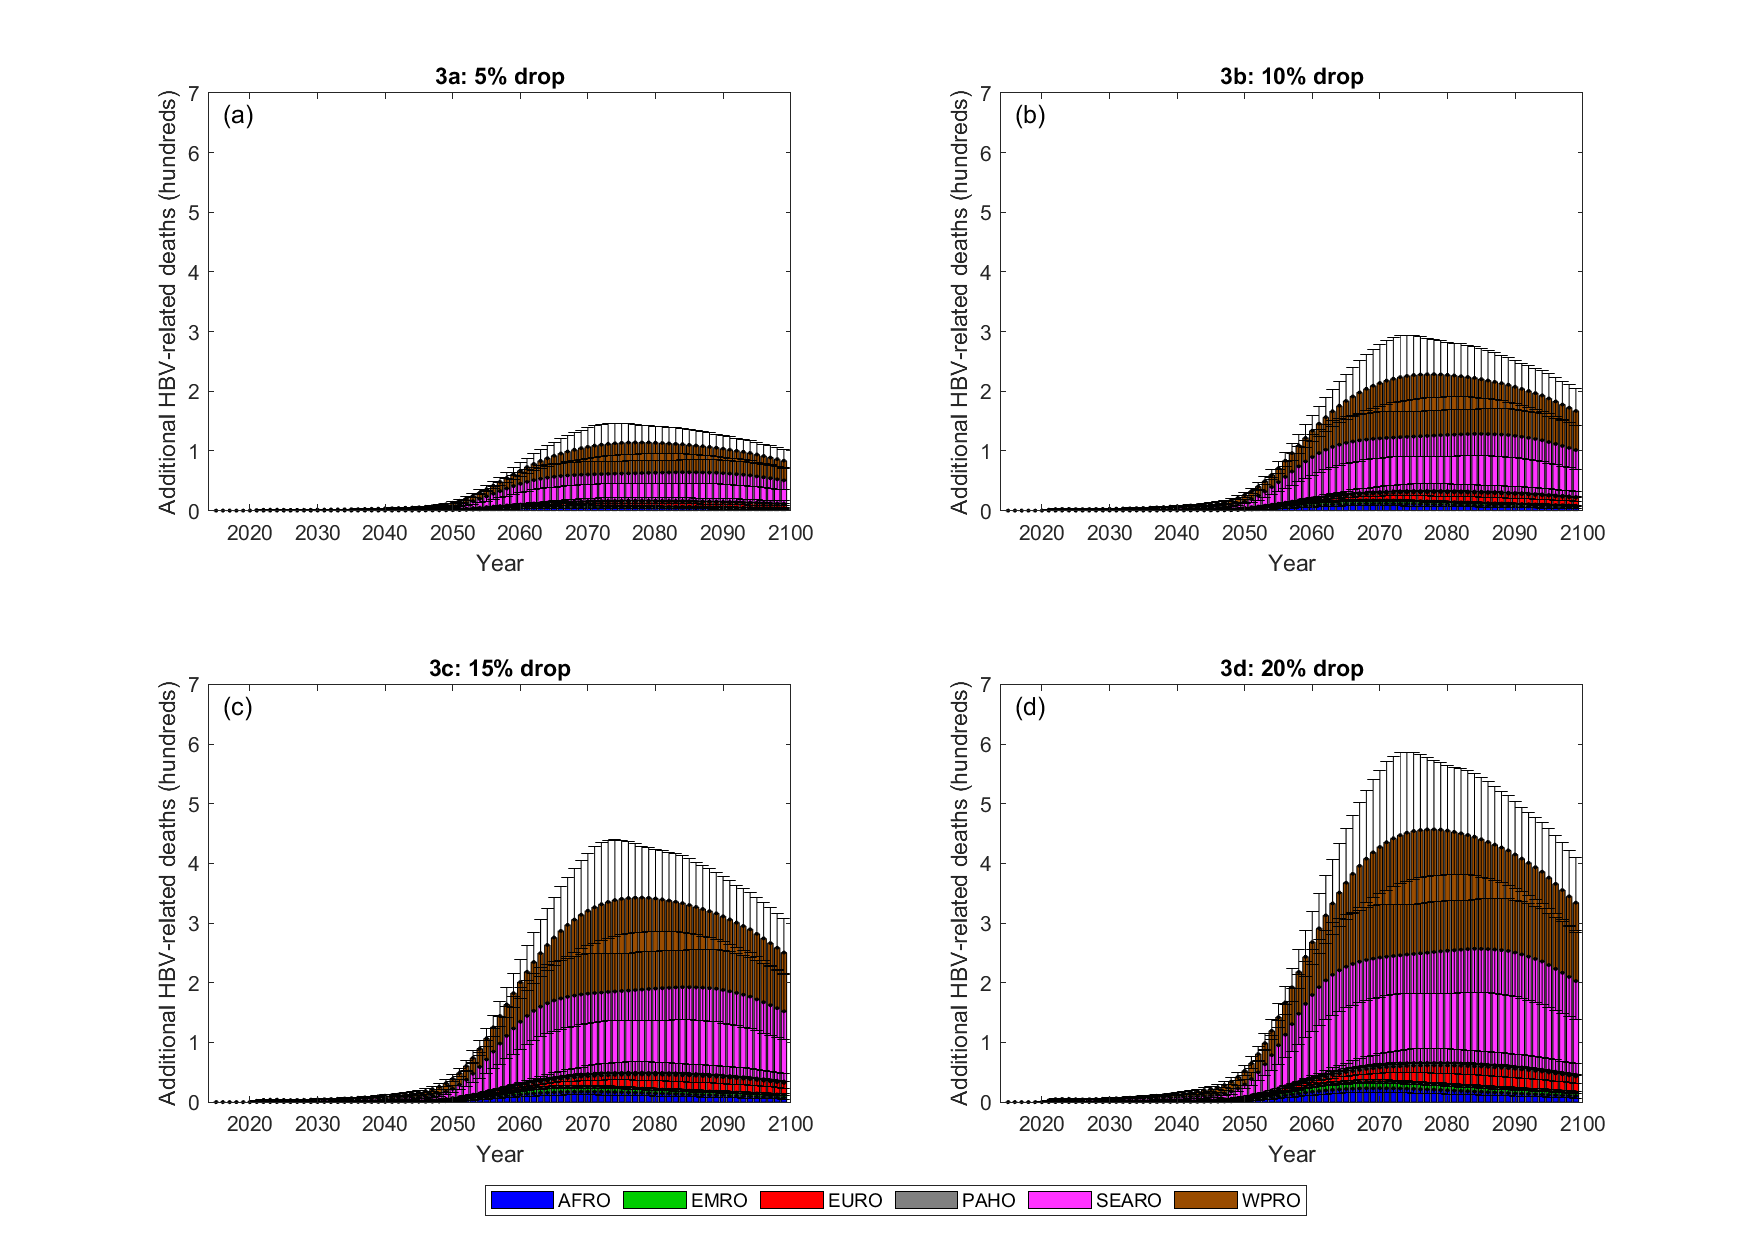


Fig. S6: Additional HBV-related deaths (mean and 95% credibility intervals) in the years 2020 to 2100 due to a drop in the percentage of new-borns receiving TBD in 2020 (scenarios 3a to 3d) relative to the status quo scenario (scenario 1). HBV: hepatitis B; TBD: timely birth dose.


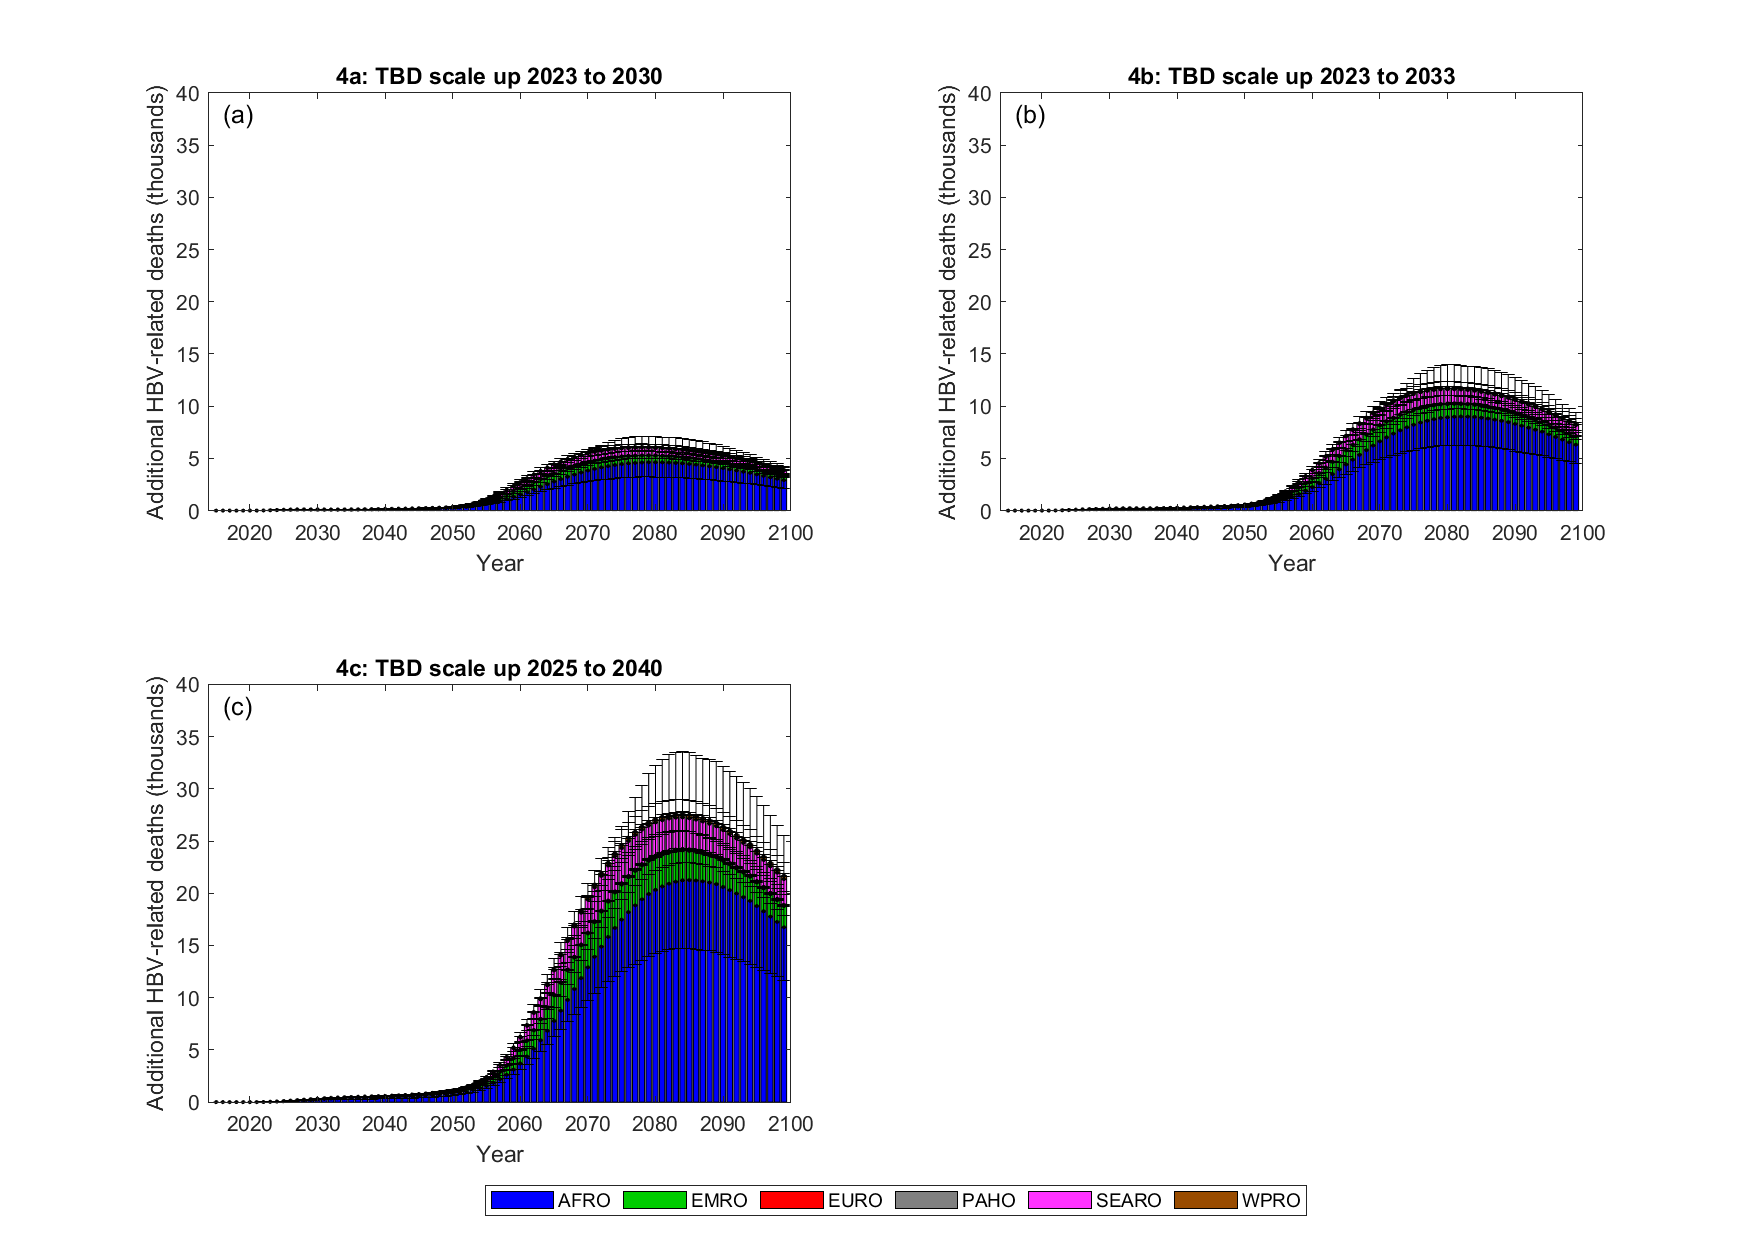


Fig. S7: Additional HBV-related deaths (mean and 95% credibility intervals) in the years 2020 to 2100 due to delays in scaling up TBD coverage to ≥90% (scenarios 4a to 4c) relative to scaling up TBD coverage to ≥90% between 2019 and 2030 (scenario 2). HBV: hepatitis B; TBD: timely birth dose.

Table S1: Sources of HBsAg prevalence data used for model calibrations. HBsAg: hepatitis B surface antigen; WHO: World Health Organization.

| **Country** | **ISO (WHO region)** | **Data year** | **Data source** |
| --- | --- | --- | --- |
| **Afghanistan** | AFG (EMRO) | 2015 | WHO dashboard |
| **Angola** | AGO (AFRO) | 2017 | Polaris Observatory |
| **Albania** | ALB (EURO) | 2017 | Polaris Observatory |
| **Armenia** | ARM (EURO) | 2017 | Polaris Observatory |
| **Azerbaijan** | AZE (EURO) | 2017 | Polaris Observatory |
| **Burundi** | BDI (AFRO) | 2017 | Polaris Observatory |
| **Benin** | BEN (AFRO) | 2015 | WHO dashboard |
| **Burkina Faso** | BFA (AFRO) | 2017 | Polaris Observatory |
| **Bangladesh** | BGD (SEARO) | 2017 | Polaris Observatory |
| **Bosnia and Herzegovina** | BIH (EURO) | 2015 | WHO dashboard |
| **Belarus** | BLR (EURO) | 2017 | Polaris Observatory |
| **Belize** | BLZ (PAHO) | 2017 | Polaris Observatory |
| **Bolivia** | BOL (PAHO) | 2015 | WHO dashboard |
| **Bhutan** | BTN (SEARO) | 2015 | WHO dashboard |
| **Central African Republic** | CAF (AFRO) | 2017 | Polaris Observatory |
| **China** | CHN (WPRO) | 1992, 2006 and 2014 | Cui *et al*. (2017)7 |
| **Ivory Coast** | CIV (AFRO) | 2017 | Polaris Observatory |
| **Cameroon** | CMR (AFRO) | 2017 | Polaris Observatory |
| **Democratic Republic of the Congo** | COD (AFRO) | 2015 | WHO dashboard |
| **Congo** | COG (AFRO) | 2015 | WHO dashboard |
| **Colombia** | COL (PAHO) | 2017 | Polaris Observatory |
| **Comoros** | COM (AFRO) | 2015 | WHO dashboard |
| **Cape Verde** | CPV (AFRO) | 2015 | WHO dashboard |
| **Cuba** | CUB (PAHO) | 2017 | Polaris Observatory |
| **Djibouti** | DJI (EMRO) | 2015 | WHO dashboard |
| **Algeria** | DZA (AFRO) | 2017 | Polaris Observatory |
| **Ecuador** | ECU (PAHO) | 2015 | WHO dashboard |
| **Egypt** | EGY (EMRO) | 2017 | Polaris Observatory |
| **Eritrea** | ERI (AFRO) | 2015 | WHO dashboard |
| **Ethiopia** | ETH (AFRO) | 2002 and 2015 | Polaris Observatory |
| **Fiji** | FJI (WPRO) | 2017 | Polaris Observatory |
| **Micronesia** | FSM (WPRO) | 2015 | WHO dashboard |
| **Georgia** | GEO (EURO) | 2017 | Polaris Observatory |
| **Ghana** | GHA (AFRO) | 2017 | Polaris Observatory |
| **Guinea** | GIN (AFRO) | 2015 | WHO dashboard |
| **Gambia** | GMB (AFRO) | 2017 | Polaris Observatory |
| **Guinea-Bissau** | GNB (AFRO) | 2015 | WHO dashboard |
| **Guatemala** | GTM (PAHO) | 2017 | Polaris Observatory |
| **Guyana** | GUY (PAHO) | 2015 | WHO dashboard |
| **Honduras** | HND (PAHO) | 2015 | WHO dashboard |
| **Haiti** | HTI (PAHO) | 2017 | Polaris Observatory |
| **Indonesia** | IDN (SEARO) | 2017 | Polaris Observatory |
| **India** | IND (SEARO) | 2002 | Polaris Observatory |
| **Iran** | IRN (EMRO) | 2017 | Polaris Observatory |
| **Iraq** | IRQ (EMRO) | 2017 | Polaris Observatory |
| **Jamaica** | JAM (PAHO) | 2017 | Polaris Observatory |
| **Jordan** | JOR (EMRO) | 2017 | Polaris Observatory |
| **Kenya** | KEN (AFRO) | 2017 | Polaris Observatory |
| **Kyrgyzstan** | KGZ (EURO) | 2017 | Polaris Observatory |
| **Cambodia** | KHM (WPRO) | 2017 | Polaris Observatory |
| **Kiribati** | KIR (WPRO) | 2017 | Polaris Observatory |
| **Laos** | LAO (WPRO) | 2017 | Polaris Observatory |
| **Liberia** | LBR (AFRO) | 2015 | WHO dashboard |
| **Sri Lanka** | LKA (SEARO) | 2015 | WHO dashboard |
| **Lesotho** | LSO (AFRO) | 2015 | WHO dashboard |
| **Morocco** | MAR (EMRO) | 2017 | Polaris Observatory |
| **Moldova** | MDA (EURO) | 2015 | WHO dashboard |
| **Madagascar** | MDG (AFRO) | 2017 | Polaris Observatory |
| **Marshall Islands** | MHL (WPRO) | 2015 | WHO dashboard |
| **North Macedonia** | MKD (EURO) | 2015 | WHO dashboard |
| **Mali** | MLI (AFRO) | 2017 | Polaris Observatory |
| **Myanmar** | MMR (SEARO) | 2017 | Polaris Observatory |
| **Mongolia** | MNG (WPRO) | 2017 | Polaris Observatory |
| **Mozambique** | MOZ (AFRO) | 2017 | Polaris Observatory |
| **Mauritania** | MRT (AFRO) | 2017 | Polaris Observatory |
| **Malawi** | MWI (AFRO) | 2017 | Polaris Observatory |
| **Namibia** | NAM (AFRO) | 2015 | WHO dashboard |
| **Niger** | NER (AFRO) | 2015 | WHO dashboard |
| **Nigeria** | NGA (AFRO) | 2013 | Polaris Observatory |
| **Nicaragua** | NIC (PAHO) | 2017 | Polaris Observatory |
| **Nepal** | NPL (SEARO) | 2015 | WHO dashboard |
| **Pakistan** | PAK (EMRO) | 2008 | Polaris Observatory |
| **Peru** | PER (PAHO) | 2017 | Polaris Observatory |
| **Philippines** | PHL (WPRO) | 2017 | Polaris Observatory |
| **Papua New Guinea** | PNG (WPRO) | 2017 | Polaris Observatory |
| **Korea, North** | PRK (SEARO) | 2015 | WHO dashboard |
| **Paraguay** | PRY (PAHO) | 2015 | WHO dashboard |
| **Rwanda** | RWA (AFRO) | 2017 | Polaris Observatory |
| **Sudan** | SDN (EMRO) | 2017 | Polaris Observatory |
| **Senegal** | SEN (AFRO) | 2017 | Polaris Observatory |
| **Solomon Islands** | SLB (WPRO) | 2015 | WHO dashboard |
| **Sierra Leone** | SLE (AFRO) | 2015 | WHO dashboard |
| **El Salvador** | SLV (PAHO) | 2017 | Polaris Observatory |
| **Somalia** | SOM (EMRO) | 2015 | WHO dashboard |
| **Serbia** | SRB (EURO) | 2015 | WHO dashboard |
| **South Sudan** | SSD (AFRO) | 2015 | WHO dashboard |
| **Sao Tome and Principe** | STP (AFRO) | 2015 | WHO dashboard |
| **Eswatini** | SWZ (AFRO) | 2015 | WHO dashboard |
| **Syria** | SYR (EMRO) | 2017 | Polaris Observatory |
| **Chad** | TCD (AFRO) | 2017 | Polaris Observatory |
| **Togo** | TGO (AFRO) | 2015 | WHO dashboard |
| **Thailand** | THA (SEARO) | 2017 | Polaris Observatory |
| **Tajikistan** | TJK (EURO) | 2017 | Polaris Observatory |
| **Turkmenistan** | TKM (EURO) | 2017 | Polaris Observatory |
| **Timor-Leste** | TLS (SEARO) | 2015 | WHO dashboard |
| **Tonga** | TON (WPRO) | 2015 | WHO dashboard |
| **Tunisia** | TUN (EMRO) | 2017 | Polaris Observatory |
| **Tuvalu** | TUV (WPRO) | 2015 | WHO dashboard |
| **Tanzania** | TZA (AFRO) | 2017 | Polaris Observatory |
| **Uganda** | UGA (AFRO) | 2017 | Polaris Observatory |
| **Ukraine** | UKR (EURO) | 2015 | WHO dashboard |
| **Uzbekistan** | UZB (EURO) | 2017 | Polaris Observatory |
| **Venezuela** | VEN (PAHO) | 2017 | Polaris Observatory |
| **Viet Nam** | VNM (WPRO) | 2017 | Polaris Observatory |
| **Vanuatu** | VUT (WPRO) | 2015 | WHO dashboard |
| **Samoa** | WSM (WPRO) | 2015 | WHO dashboard |
| **Yemen** | YEM (EMRO) | 2017 | Polaris Observatory |
| **South Africa** | ZAF (AFRO) | 2015 | WHO dashboard |
| **Zambia** | ZMB (AFRO) | 2017 | Polaris Observatory |
| **Zimbabwe** | ZWE (AFRO) | 2017 | Polaris Observatory |

Table S2: HBsAg prevalence (<http://whohbsagdashboard.com/#hbv-country-profiles>, accessed in January 2021) in all age groups in 2015 in the countries modelled in the WHO regions. HBsAg: hepatitis B surface antigen; WHO: World Health Organization.

| **WHO region** | **HBsAg prevalence in modelled countries (%)** | **HBsAg prevalence in excluded countries (%)** | **HBsAg prevalent cases located in modelled countries (%)** |
| --- | --- | --- | --- |
| **AFRO** | 6.10 | 4.40 | 99.52 |
| **EMRO** | 3.41 | 1.68 | 94.81 |
| **EURO** | 2.75 | 1.39 | 26.81 |
| **PAHO** | 1.51 | 0.46 | 46.90 |
| **SEARO** | 2.05 | 1.10 | 99.99 |
| **WPRO** | 6.71 | 1.97 | 95.81 |
| **Global** | 4.31 | 1.10 | 92.02 |

Table S3: Mean number of HBV-related deaths averted regionally and globally in birth cohorts born between 2020 and 2030 in selected scenarios relative to the status quo scenario (scenario 1), with 95% credibility intervals in parentheses. Two target values are presented for scenario 2 i.e. TBD expansion to ≥25% and ≥90% by 2030. HBV: hepatitis B; TBD: timely birth dose; WHO: World Health Organization.

| **WHO region** | **Scenario 2 (≥25%)** | **Scenario 2 (≥90%)** | **Scenario 3a** | **Scenario 3d** | **Scenario 4a** | **Scenario 4c** |
| --- | --- | --- | --- | --- | --- | --- |
| **Default settings** | | | | | | |
| **AFRO** | 152,880 (112,997 to 227,681) | 558,284 (412,990 to 829,888) | -194 (-272 to -138) | -778 (-1,089 to -554) | 405,526 (299,599 to 609,113) | 106,330 (78,410 to 160,964) |
| **EMRO** | 24,773 (14,447 to 40,445) | 94,193 (57,686 to 150,325) | -97 (-121 to -76) | -387 (-484 to -303) | 68,147 (41,026 to 109,299) | 17,902 (10,624 to 28,959) |
| **EURO** | 14 (8 to 24) | 533 (284 to 891) | -289 (-485 to -180) | -1,154 (-1,941 to -721) | 360 (192 to 606) | 89 (48 to 151) |
| **PAHO** | 818 (540 to 1,260) | 4,005 (2,855 to 5,579) | -41 (-51 to -32) | -165 (-205 to -126) | 2,841 (2,007 to 3,987) | 737 (516 to 1,043) |
| **SEARO** | 5,967 (4,092 to 8,641) | 102,953 (61,568 to 156,522) | -1,857 (-2,677 to -1,190) | -7,429 (-10,708 to -4,759) | 73,792 (43,654 to 112,979) | 19,024 (11,151 to 29,296) |
| **WPRO** | 0 (0 to 0) | 11,064 (7,614 to 16,026) | -1,787 (-2,846 to -1,117) | -7,148 (-11,385 to -4,470) | 7,644 (5,217 to 11,052) | 1,949 (1,316 to 2,825) |
| **Global** | 184,454 (139,937 to 265,792) | 771,032 (602,591 to 1,058,276) | -4,265 (-5,710 to -3,206) | -17,061 (-22,846 to -12,826) | 558,311 (435,030 to 774,235) | 146,032 (113,588 to 204,113) |
| **Infant HBV vaccine series scaled up to 100% coverage in 2020** | | | | | | |
| **AFRO** | 125,129 (93,125 to 187,593) | 453,640 (338,834 to 676,799) | -188 (-264 to -133) | -753 (-1,056 to -534) | 329,441 (245,093 to 495,719) | 85,523 (63,436 to 129,505) |
| **EMRO** | 21,608 (12,175 to 35,506) | 81,827 (48,463 to 132,343) | -92 (-115 to -72) | -369 (-459 to -289) | 59,115 (34,448 to 96,596) | 15,318 (8,810 to 25,206) |
| **EURO** | 13 (7 to 22) | 470 (250 to 793) | -283 (-478 to -176) | -1,134 (-1,914 to -705) | 317 (168 to 538) | 78 (41 to 133) |
| **PAHO** | 701 (445 to 1,110) | 3,477 (2,462 to 4,908) | -39 (-49 to -30) | -157 (-195 to -119) | 2,460 (1,721 to 3,506) | 627 (435 to 901) |
| **SEARO** | 5,850 (3,998 to 8,518) | 99,022 (58,802 to 151,220) | -1,794 (-2,595 to -1,141) | -7,178 (-10,382 to -4,566) | 70,920 (41,656 to 109,069) | 18,220 (10,604 to 28,186) |
| **WPRO** | 0 (0 to 0) | 8,513 (5,788 to 12,515) | -1,754 (-2,805 to -1,087) | -7,016 (-11,221 to -4,347) | 5,885 (3,967 to 8,781) | 1,476 (989 to 2,231) |
| **Global** | 153,300 (117,276 to 217,823) | 646,949 (507,736 to 877,077) | -4,151 (-5,580 to -3,112) | -16,606 (-22,327 to -12,449) | 468,139 (366,174 to 638,636) | 121,241 (94,596 to 166,153) |
| **Treatment level such that 40% of treatment-eligible individuals are in treatment in 2030** | | | | | | |
| **AFRO** | 87,993 (71,712 to 108,935) | 321,502 (261,703 to 397,703) | -129 (-159 to -104) | -516 (-637 to -415) | 232,155 (188,254 to 289,461) | 60,602 (49,098 to 75,984) |
| **EMRO** | 15,166 (10,046 to 18,688) | 57,623 (39,297 to 70,433) | -67 (-78 to -58) | -269 (-312 to -230) | 41,408 (27,796 to 51,004) | 10,823 (7,154 to 13,405) |
| **EURO** | 8 (6 to 10) | 315 (240 to 412) | -187 (-270 to -130) | -748 (-1,080 to -520) | 211 (159 to 278) | 52 (39 to 69) |
| **PAHO** | 491 (391 to 569) | 2,442 (2,067 to 2,734) | -28 (-31 to -25) | -111 (-123 to -98) | 1,719 (1,442 to 1,933) | 443 (369 to 499) |
| **SEARO** | 3,617 (3,291 to 4,002) | 64,360 (41,328 to 80,792) | -1,194 (-1,490 to -816) | -4,776 (-5,962 to -3,263) | 45,917 (29,162 to 57,869) | 11,801 (7,428 to 14,919) |
| **WPRO** | 0 (0 to 0) | 6,875 (5,678 to 7,837) | -1,302 (-1,853 to -873) | -5,211 (-7,414 to -3,493) | 4,715 (3,833 to 5,430) | 1,195 (961 to 1,393) |
| **Global** | 107,276 (89,031 to 128,369) | 453,116 (398,089 to 518,093) | -2,907 (-3,574 to -2,325) | -11,629 (-14,297 to -9,300) | 326,125 (285,410 to 375,192) | 84,917 (74,059 to 98,112) |
| **Treatment level such that 80% of treatment-eligible individuals are in treatment in 2030** | | | | | | |
| **AFRO** | 36,388 (32,500 to 43,665) | 132,635 (118,456 to 158,811) | -51 (-63 to -39) | -202 (-253 to -157) | 94,768 (84,409 to 114,362) | 24,503 (21,789 to 29,745) |
| **EMRO** | 5,748 (3,947 to 7,235) | 21,794 (15,268 to 27,293) | -28 (-32 to -24) | -112 (-130 to -96) | 15,411 (10,606 to 19,492) | 3,971 (2,707 to 5,051) |
| **EURO** | 3 (2 to 3) | 116 (78 to 151) | -111 (-136 to -88) | -446 (-544 to -351) | 76 (49 to 100) | 18 (12 to 25) |
| **PAHO** | 218 (161 to 257) | 1,026 (787 to 1,179) | -11 (-13 to -10) | -45 (-51 to -39) | 710 (538 to 823) | 180 (136 to 210) |
| **SEARO** | 1,112 (1,008 to 1,229) | 23,733 (14,201 to 30,050) | -528 (-642 to -367) | -2,111 (-2,567 to -1,468) | 16,719 (9,842 to 21,310) | 4,263 (2,480 to 5,459) |
| **WPRO** | 0 (0 to 0) | 3,037 (2,493 to 3,514) | -557 (-857 to -342) | -2,228 (-3,428 to -1,368) | 2,038 (1,646 to 2,388) | 507 (406 to 599) |
| **Global** | 43,469 (39,356 to 50,302) | 182,341 (165,764 to 207,171) | -1,286 (-1,603 to -1,025) | -5,145 (-6,413 to -4,100) | 129,723 (117,318 to 148,525) | 33,443 (30,149 to 38,505) |

Table S4: Median year of elimination of HBV (year that HBsAg prevalence in five-year-olds falls below 0.1%) regionally and globally in selected scenarios, with 95% credibility intervals in parentheses. Two target values are presented for scenario 2 i.e. TBD expansion to ≥25% and ≥90% by 2030. HBsAg: hepatitis B surface antigen; HBV: hepatitis B; TBD: timely birth dose; WHO: World Health Organization.

| **WHO region** | **Scenario 1** | **Scenario 2 (≥25%)** | **Scenario 2 (≥90%)** | **Scenario 3a** | **Scenario 3d** | **Scenario 4a** | **Scenario 4c** |
| --- | --- | --- | --- | --- | --- | --- | --- |
| **Default settings** | | | | | | | |
| **AFRO** | after 2100 (after 2100 to after 2100) | after 2100 (after 2100 to after 2100) | 2059 (2058 to 2063) | after 2100 (after 2100 to after 2100) | after 2100 (after 2100 to after 2100) | 2060 (2059 to 2064) | 2065 (2063 to 2069) |
| **EMRO** | after 2100 (after 2100 to after 2100) | after 2100 (2082 to after 2100) | 2051 (2042 to 2057) | after 2100 (after 2100 to after 2100) | after 2100 (after 2100 to after 2100) | 2052 (2042 to 2058) | 2055 (2045 to 2064) |
| **EURO** | 2038 (2037 to 2039) | 2038 (2037 to 2039) | 2037 (2035 to 2038) | 2038 (2037 to 2039) | 2038 (2037 to 2039) | 2037 (2035 to 2038) | 2037 (2036 to 2039) |
| **PAHO** | 2053 (2043 to 2072) | 2045 (2039 to 2054) | 2032 (2031 to 2032) | 2053 (2043 to 2072) | 2053 (2043 to 2072) | 2033 (2032 to 2033) | 2038 (2036 to 2039) |
| **SEARO** | 2064 (2051 to 2075) | 2062 (2049 to 2074) | 2045 (2040 to 2049) | 2064 (2051 to 2075) | 2064 (2051 to 2075) | 2045 (2040 to 2049) | 2045 (2042 to 2049) |
| **WPRO** | 2042 (2040 to 2045) | 2042 (2040 to 2045) | 2035 (2034 to 2037) | 2042 (2040 to 2045) | 2042 (2040 to 2045) | 2035 (2034 to 2037) | 2038 (2037 to 2040) |
| **Global** | after 2100 (after 2100 to after 2100) | after 2100 (2095 to after 2100) | 2053 (2051 to 2056) | after 2100 (after 2100 to after 2100) | after 2100 (after 2100 to after 2100) | 2054 (2052 to 2057) | 2057 (2054 to 2061) |
| **Infant HBV vaccine series scaled up to 100% coverage in 2020** | | | | | | | |
| **AFRO** | after 2100 (after 2100 to after 2100) | 2093 (2085 to after 2100) | 2054 (2058 to 2058) | after 2100 (after 2100 to after 2100) | after 2100 (after 2100 to after 2100) | 2055 (2053 to 2059) | 2057 (2054 to 2062) |
| **EMRO** | after 2100 (2074 to after 2100) | 2082 (2063 to after 2100) | 2044 (2035 to 2051) | after 2100 (2074 to after 2100) | after 2100 (2074 to after 2100) | 2044 (2035 to 2051) | 2045 (2043 to 2053) |
| **EURO** | 2038 (2036 to 2039) | 2038 (2036 to 2039) | 2036 (2035 to 2038) | 2038 (2036 to 2039) | 2038 (2036 to 2039) | 2036 (2035 to 2038) | 2037 (2036 to 2038) |
| **PAHO** | 2047 (2039 to 2059) | 2041 (2035 to 2048) | 2031 (2030 to 2032) | 2047 (2039 to 2059) | 2047 (2039 to 2059) | 2032 (2031 to 2033) | 2036 (2034 to 2038) |
| **SEARO** | 2062 (2050 to 2074) | 2060 (2049 to 2073) | 2044 (2039 to 2048) | 2062 (2050 to 2074) | 2062 (2050 to 2074) | 2044 (2039 to 2048) | 2045 (2042 to 2048) |
| **WPRO** | 2039 (2037 to 2041) | 2039 (2037 to 2041) | 2034 (2032 to 2035) | 2039 (2037 to 2042) | 2039 (2037 to 2042) | 2034 (2033 to 2035) | 2037 (2035 to 2038) |
| **Global** | after 2100 (2090 to after 2100) | 2082 (2076 to 2095) | 2048 (2046 to 2051) | after 2100 (2090 to after 2100) | after 2100 (2090 to after 2100) | 2048 (2046 to 2052) | 2049 (2047 to 2053) |
| **Treatment level such that 40% of treatment-eligible individuals are in treatment in 2030** | | | | | | | |
| **AFRO** | after 2100 (after 2100 to after 2100) | 2099 (2093 to after 2100) | 2056 (2055 to 2060) | after 2100 (after 2100 to after 2100) | after 2100 (after 2100 to after 2100) | 2057 (2056 to 2061) | 2061 (2059 to 2065) |
| **EMRO** | after 2100 (2089 to after 2100) | 2089 (2074 to 2100) | 2046 (2039 to 2051) | after 2100 (2089 to after 2100) | after 2100 (2089 to after 2100) | 2046 (2039 to 2053) | 2047 (2044 to 2055) |
| **EURO** | 2037 (2036 to 2038) | 2037 (2036 to 2038) | 2036 (2035 to 2037) | 2037 (2036 to 2038) | 2037 (2036 to 2038) | 2036 (2035 to 2037) | 2037 (2036 to 2037) |
| **PAHO** | 2047 (2041 to 2052) | 2041 (2037 to 2045) | 2031 (2030 to 2032) | 2047 (2041 to 2052) | 2047 (2041 to 2052) | 2032 (2032 to 2032) | 2036 (2035 to 2037) |
| **SEARO** | 2059 (2048 to 2068) | 2057 (2048 to 2067) | 2043 (2037 to 2047) | 2059 (2048 to 2068) | 2059 (2048 to 2069) | 2043 (2037 to 2047) | 2044 (2041 to 2047) |
| **WPRO** | 2040 (2039 to 2042) | 2040 (2039 to 2042) | 2034 (2033 to 2035) | 2040 (2039 to 2042) | 2040 (2039 to 2042) | 2034 (2033 to 2035) | 2037 (2036 to 2038) |
| **Global** | after 2100 (2100 to after 2100) | 2088 (2083 to 2100) | 2050 (2048 to 2052) | after 2100 (2100 to after 2100) | after 2100 (2100 to after 2100) | 2050 (2049 to 2053) | 2052 (2050 to 2056) |
| **Treatment level such that 80% of treatment-eligible individuals are in treatment in 2030** | | | | | | | |
| **AFRO** | 2085 (2080 to 2099) | 2075 (2071 to 2085) | 2049 (2048 to 2053) | 2085 (2080 to 2099) | 2085 (2080 to 2099) | 2050 (2048 to 2053) | 2050 (2049 to 2055) |
| **EMRO** | 2068 (2057 to 2078) | 2060 (2052 to 2067) | 2035 (2034 to 2038) | 2068 (2057 to 2078) | 2068 (2057 to 2078) | 2035 (2035 to 2038) | 2043 (2042 to 2044) |
| **EURO** | 2034 (2033 to 2035) | 2034 (2033 to 2035) | 2034 (2033 to 2034) | 2034 (2033 to 2035) | 2034 (2033 to 2035) | 2034 (2033 to 2034) | 2034 (2033 to 2035) |
| **PAHO** | 2036 (2032 to 2039) | 2033 (2030 to 2035) | 2029 (2028 to 2030) | 2036 (2032 to 2039) | 2036 (2032 to 2039) | 2030 (2029 to 2031) | 2033 (2031 to 2034) |
| **SEARO** | 2050 (2044 to 2055) | 2050 (2043 to 2054) | 2038 (2034 to 2042) | 2050 (2044 to 2055) | 2051 (2044 to 2055) | 2038 (2034 to 2042) | 2042 (2039 to 2044) |
| **WPRO** | 2036 (2034 to 2037) | 2036 (2034 to 2037) | 2032 (2031 to 2033) | 2036 (2034 to 2037) | 2036 (2034 to 2037) | 2032 (2031 to 2033) | 2034 (2033 to 2035) |
| **Global** | 2074 (2071 to 2085) | 2065 (2063 to 2073) | 2042 (2040 to 2044) | 2074 (2071 to 2085) | 2074 (2071 to 2085) | 2042 (2040 to 2045) | 2045 (2044 to 2045) |

Table S5. Mean number of HBV-related deaths averted in birth cohorts born between 2020 and 2030 in selected scenarios relative to the status quo scenario (scenario 1) for each country modelled, with 95% credibility intervals in parentheses. Two target values are presented for scenario 2 i.e. TBD expansion to ≥25% and ≥90% by 2030. HBV: hepatitis B; TBD: timely birth dose; WHO: World Health Organization.

| **Country** | **ISO  (WHO region)** | **Scenario 2 (≥25%)** | **Scenario 2 (≥90%)** | **Scenario 3a** | **Scenario 3d** | **Scenario 4a** | **Scenario 4c** |
| --- | --- | --- | --- | --- | --- | --- | --- |
| **Default settings** | | | | | | | |
| **Afghanistan** | AFG (EMRO) | 0 (0 to 0) | 3,496 (1,899 to 5,999) | -23 (-38 to -13) | -91 (-150 to -53) | 2,532 (1,363 to 4,412) | 666 (353 to 1,176) |
| **Angola** | AGO (AFRO) | 6,428 (3,164 to 11,558) | 23,199 (11,440 to 41,596) | 0 (0 to 0) | 0 (0 to 0) | 17,074 (8,209 to 31,090) | 4,587 (2,157 to 8,470) |
| **Albania** | ALB (EURO) | 0 (0 to 0) | 0 (0 to 0) | 0 (-1 to 0) | -2 (-3 to -1) | 0 (0 to 0) | 0 (0 to 0) |
| **Armenia** | ARM (EURO) | 0 (0 to 0) | 0 (0 to 0) | -3 (-6 to -1) | -12 (-23 to -6) | 0 (0 to 0) | 0 (0 to 0) |
| **Azerbaijan** | AZE (EURO) | 0 (0 to 0) | 0 (0 to 0) | -26 (-43 to -13) | -105 (-174 to -53) | 0 (0 to 0) | 0 (0 to 0) |
| **Burundi** | BDI (AFRO) | 511 (290 to 826) | 1,840 (1,044 to 2,972) | 0 (0 to 0) | 0 (0 to 0) | 1,349 (756 to 2,207) | 355 (196 to 586) |
| **Benin** | BEN (AFRO) | 2,778 (1,483 to 5,699) | 10,052 (5,369 to 20,550) | 0 (0 to 0) | 0 (0 to 0) | 7,121 (3,755 to 14,923) | 1,823 (952 to 3,874) |
| **Burkina Faso** | BFA (AFRO) | 1,745 (1,049 to 2,712) | 6,283 (3,779 to 9,762) | 0 (0 to 0) | 0 (0 to 0) | 4,449 (2,626 to 7,018) | 1,133 (658 to 1,815) |
| **Bangladesh** | BGD (SEARO) | 4,168 (2,495 to 6,726) | 15,002 (8,982 to 24,203) | 0 (0 to 0) | 0 (0 to 0) | 10,671 (6,302 to 17,351) | 2,738 (1,600 to 4,486) |
| **Bosnia and Herzegovina** | BIH (EURO) | 14 (8 to 24) | 51 (27 to 85) | 0 (0 to 0) | 0 (0 to 0) | 36 (19 to 60) | 9 (5 to 16) |
| **Belarus** | BLR (EURO) | 0 (0 to 0) | 0 (0 to 0) | -7 (-13 to -3) | -28 (-53 to -13) | 0 (0 to 0) | 0 (0 to 0) |
| **Belize** | BLZ (PAHO) | 0 (0 to 0) | 1 (1 to 2) | 0 (0 to 0) | 0 (0 to 0) | 1 (0 to 1) | 0 (0 to 0) |
| **Bolivia** | BOL (PAHO) | 123 (59 to 223) | 442 (212 to 803) | 0 (0 to 0) | 0 (0 to 0) | 313 (144 to 586) | 81 (36 to 155) |
| **Bhutan** | BTN (SEARO) | 0 (0 to 0) | 3 (1 to 6) | -1 (-2 to 0) | -4 (-6 to -2) | 2 (1 to 4) | 0 (0 to 1) |
| **Central African Republic** | CAF (AFRO) | 1,239 (609 to 2,415) | 4,512 (2,218 to 8,755) | 0 (0 to 0) | 0 (0 to 0) | 3,318 (1,613 to 6,509) | 884 (424 to 1,757) |
| **China** | CHN (WPRO) | 0 (0 to 0) | 0 (0 to 0) | -1,412 (-2,421 to -760) | -5,650 (-9,686 to -3,039) | 0 (0 to 0) | 0 (0 to 0) |
| **Ivory Coast** | CIV (AFRO) | 2,048 (943 to 3,412) | 10,366 (4,773 to 17,264) | -10 (-17 to -6) | -41 (-66 to -22) | 7,644 (3,412 to 12,798) | 2,029 (886 to 3,414) |
| **Cameroon** | CMR (AFRO) | 4,447 (2,288 to 7,569) | 16,008 (8,246 to 27,244) | 0 (0 to 0) | 0 (0 to 0) | 11,710 (5,841 to 20,036) | 3,121 (1,510 to 5,303) |
| **Democratic Republic of the Congo** | COD (AFRO) | 11,041 (5,448 to 21,233) | 39,758 (19,638 to 76,429) | 0 (0 to 0) | 0 (0 to 0) | 29,190 (14,011 to 56,755) | 7,843 (3,679 to 15,393) |
| **Congo** | COG (AFRO) | 925 (422 to 1,777) | 3,333 (1,525 to 6,388) | 0 (0 to 0) | 0 (0 to 0) | 2,421 (1,066 to 4,731) | 635 (271 to 1,266) |
| **Colombia** | COL (PAHO) | 0 (0 to 0) | 12 (7 to 17) | -1 (-2 to -1) | -5 (-8 to -4) | 7 (5 to 11) | 2 (1 to 3) |
| **Comoros** | COM (AFRO) | 39 (19 to 74) | 141 (67 to 266) | 0 (0 to 0) | 0 (0 to 0) | 98 (46 to 186) | 25 (11 to 47) |
| **Cape Verde** | CPV (AFRO) | 0 (0 to 0) | 0 (0 to 0) | -3 (-6 to -2) | -13 (-23 to -7) | 0 (0 to 0) | 0 (0 to 0) |
| **Cuba** | CUB (PAHO) | 0 (0 to 0) | 0 (0 to 0) | 0 (0 to 0) | -1 (-2 to -1) | 0 (0 to 0) | 0 (0 to 0) |
| **Djibouti** | DJI (EMRO) | 0 (0 to 0) | 0 (0 to 0) | -2 (-3 to -1) | -8 (-13 to -5) | 0 (0 to 0) | 0 (0 to 0) |
| **Algeria** | DZA (AFRO) | 0 (0 to 0) | 0 (0 to 0) | -82 (-152 to -35) | -326 (-609 to -141) | 0 (0 to 0) | 0 (0 to 0) |
| **Ecuador** | ECU (PAHO) | 0 (0 to 0) | 258 (130 to 419) | -11 (-17 to -6) | -44 (-68 to -25) | 183 (88 to 298) | 47 (22 to 77) |
| **Egypt** | EGY (EMRO) | 0 (0 to 0) | 0 (0 to 0) | -15 (-22 to -11) | -61 (-87 to -43) | 0 (0 to 0) | 0 (0 to 0) |
| **Eritrea** | ERI (AFRO) | 136 (75 to 228) | 490 (271 to 819) | 0 (0 to 0) | 0 (0 to 0) | 345 (185 to 588) | 88 (46 to 153) |
| **Ethiopia** | ETH (AFRO) | 6,834 (3,470 to 12,101) | 24,650 (12,513 to 43,639) | 0 (0 to 0) | 0 (0 to 0) | 17,500 (8,772 to 31,172) | 4,483 (2,227 to 8,023) |
| **Fiji** | FJI (WPRO) | 0 (0 to 0) | 0 (0 to 0) | -1 (-2 to -1) | -5 (-8 to -2) | 0 (0 to 0) | 0 (0 to 0) |
| **Micronesia** | FSM (WPRO) | 0 (0 to 0) | 6 (2 to 11) | 0 (0 to 0) | -1 (-2 to 0) | 4 (1 to 8) | 1 (0 to 2) |
| **Georgia** | GEO (EURO) | 0 (0 to 0) | 0 (0 to 0) | -4 (-7 to -2) | -17 (-30 to -10) | 0 (0 to 0) | 0 (0 to 0) |
| **Ghana** | GHA (AFRO) | 4,360 (2,698 to 6,754) | 15,686 (9,709 to 24,290) | 0 (0 to 0) | 0 (0 to 0) | 11,438 (6,997 to 17,838) | 2,988 (1,811 to 4,689) |
| **Guinea** | GIN (AFRO) | 6,997 (3,271 to 12,422) | 25,423 (11,946 to 45,415) | 0 (0 to 0) | 0 (0 to 0) | 18,564 (8,562 to 33,013) | 4,954 (2,252 to 8,745) |
| **Gambia** | GMB (AFRO) | 155 (50 to 309) | 559 (179 to 1,114) | 0 (0 to 0) | 0 (0 to 0) | 396 (118 to 813) | 102 (29 to 213) |
| **Guinea-Bissau** | GNB (AFRO) | 377 (201 to 613) | 1,355 (722 to 2,205) | 0 (0 to 0) | 0 (0 to 0) | 993 (523 to 1,639) | 262 (137 to 439) |
| **Guatemala** | GTM (PAHO) | 0 (0 to 0) | 145 (101 to 207) | -2 (-3 to -2) | -9 (-11 to -6) | 99 (68 to 141) | 24 (17 to 35) |
| **Guyana** | GUY (PAHO) | 14 (7 to 25) | 49 (25 to 90) | 0 (0 to 0) | 0 (0 to 0) | 35 (17 to 64) | 9 (4 to 16) |
| **Honduras** | HND (PAHO) | 0 (0 to 0) | 162 (84 to 283) | -10 (-17 to -6) | -41 (-68 to -23) | 112 (56 to 196) | 28 (14 to 49) |
| **Haiti** | HTI (PAHO) | 549 (281 to 973) | 1,980 (1,014 to 3,502) | 0 (0 to 0) | 0 (0 to 0) | 1,432 (725 to 2,544) | 379 (190 to 677) |
| **Indonesia** | IDN (SEARO) | 0 (0 to 0) | 2,544 (1,374 to 4,988) | -497 (-924 to -282) | -1,987 (-3,698 to -1,130) | 1,728 (924 to 3,426) | 432 (230 to 864) |
| **India** | IND (SEARO) | 0 (0 to 0) | 72,033 (35,903 to 125,275) | -1,174 (-2,012 to -608) | -4,696 (-8,048 to -2,433) | 52,072 (25,654 to 90,947) | 13,500 (6,580 to 23,630) |
| **Iran** | IRN (EMRO) | 0 (0 to 0) | 0 (0 to 0) | -38 (-53 to -24) | -150 (-210 to -98) | 0 (0 to 0) | 0 (0 to 0) |
| **Iraq** | IRQ (EMRO) | 0 (0 to 0) | 1,192 (476 to 2,383) | -16 (-29 to -7) | -64 (-117 to -28) | 780 (302 to 1,582) | 190 (72 to 390) |
| **Jamaica** | JAM (PAHO) | 19 (9 to 34) | 69 (34 to 122) | 0 (0 to 0) | 0 (0 to 0) | 48 (23 to 85) | 12 (6 to 22) |
| **Jordan** | JOR (EMRO) | 28 (19 to 40) | 102 (70 to 145) | 0 (0 to 0) | 0 (0 to 0) | 73 (49 to 105) | 19 (13 to 27) |
| **Kenya** | KEN (AFRO) | 368 (240 to 546) | 1,324 (866 to 1,964) | 0 (0 to 0) | 0 (0 to 0) | 886 (569 to 1,313) | 217 (137 to 324) |
| **Kyrgyzstan** | KGZ (EURO) | 0 (0 to 0) | 0 (0 to 0) | -19 (-37 to -8) | -75 (-150 to -31) | 0 (0 to 0) | 0 (0 to 0) |
| **Cambodia** | KHM (WPRO) | 0 (0 to 0) | 58 (34 to 93) | -31 (-46 to -19) | -122 (-183 to -76) | 40 (23 to 65) | 10 (5 to 16) |
| **Kiribati** | KIR (WPRO) | 0 (0 to 0) | 0 (0 to 0) | -1 (-1 to 0) | -3 (-5 to -1) | 0 (0 to 0) | 0 (0 to 0) |
| **Laos** | LAO (WPRO) | 0 (0 to 0) | 522 (317 to 832) | -9 (-13 to -6) | -34 (-53 to -23) | 374 (224 to 597) | 98 (58 to 157) |
| **Liberia** | LBR (AFRO) | 2,084 (1,017 to 3,926) | 7,531 (3,682 to 14,135) | 0 (0 to 0) | 0 (0 to 0) | 5,452 (2,603 to 10,379) | 1,427 (670 to 2,751) |
| **Sri Lanka** | LKA (SEARO) | 232 (116 to 415) | 834 (416 to 1,493) | 0 (0 to 0) | 0 (0 to 0) | 572 (279 to 1,042) | 142 (68 to 264) |
| **Lesotho** | LSO (AFRO) | 82 (39 to 153) | 296 (142 to 551) | 0 (0 to 0) | 0 (0 to 0) | 208 (96 to 394) | 53 (24 to 103) |
| **Morocco** | MAR (EMRO) | 0 (0 to 0) | 84 (48 to 130) | -1 (-1 to -1) | -4 (-5 to -2) | 59 (32 to 92) | 15 (8 to 23) |
| **Moldova** | MDA (EURO) | 0 (0 to 0) | 0 (0 to 0) | -13 (-23 to -8) | -52 (-92 to -31) | 0 (0 to 0) | 0 (0 to 0) |
| **Madagascar** | MDG (AFRO) | 2,456 (1,502 to 3,848) | 8,840 (5,407 to 13,845) | 0 (0 to 0) | 0 (0 to 0) | 6,486 (3,942 to 10,223) | 1,709 (1,035 to 2,706) |
| **Marshall Islands** | MHL (WPRO) | 0 (0 to 0) | 0 (0 to 0) | 0 (-1 to 0) | -1 (-3 to -1) | 0 (0 to 0) | 0 (0 to 0) |
| **North Macedonia** | MKD (EURO) | 0 (0 to 0) | 0 (0 to 0) | -2 (-3 to -1) | -7 (-11 to -4) | 0 (0 to 0) | 0 (0 to 0) |
| **Mali** | MLI (AFRO) | 1,633 (860 to 2,745) | 5,888 (3,101 to 9,893) | 0 (0 to 0) | 0 (0 to 0) | 4,101 (2,129 to 6,980) | 1,040 (534 to 1,787) |
| **Myanmar** | MMR (SEARO) | 1,235 (639 to 2,173) | 11,273 (5,832 to 19,835) | -30 (-50 to -17) | -120 (-202 to -68) | 7,874 (3,991 to 14,040) | 1,993 (993 to 3,601) |
| **Mongolia** | MNG (WPRO) | 0 (0 to 0) | 0 (0 to 0) | -8 (-16 to -3) | -31 (-65 to -13) | 0 (0 to 0) | 0 (0 to 0) |
| **Mozambique** | MOZ (AFRO) | 4,236 (2,344 to 7,349) | 15,240 (8,436 to 26,428) | 0 (0 to 0) | 0 (0 to 0) | 11,236 (6,156 to 19,650) | 2,973 (1,616 to 5,235) |
| **Mauritania** | MRT (AFRO) | 1,188 (644 to 2,228) | 4,275 (2,321 to 8,004) | 0 (0 to 0) | 0 (0 to 0) | 3,144 (1,681 to 5,942) | 833 (439 to 1,584) |
| **Malawi** | MWI (AFRO) | 433 (252 to 697) | 1,559 (909 to 2,508) | 0 (0 to 0) | 0 (0 to 0) | 1,062 (603 to 1,731) | 265 (148 to 436) |
| **Namibia** | NAM (AFRO) | 0 (0 to 0) | 21 (12 to 36) | -2 (-3 to -1) | -8 (-13 to -4) | 15 (8 to 26) | 4 (2 to 7) |
| **Niger** | NER (AFRO) | 12,596 (6,620 to 22,178) | 45,375 (23,875 to 79,808) | 0 (0 to 0) | 0 (0 to 0) | 33,571 (17,314 to 59,433) | 8,921 (4,488 to 15,944) |
| **Nigeria** | NGA (AFRO) | 55,646 (20,370 to 128,090) | 203,537 (74,608 to 466,361) | 0 (0 to 0) | 0 (0 to 0) | 147,378 (53,553 to 344,344) | 38,274 (13,806 to 91,094) |
| **Nicaragua** | NIC (PAHO) | 6 (4 to 8) | 22 (16 to 31) | 0 (0 to 0) | 0 (0 to 0) | 14 (10 to 20) | 3 (2 to 5) |
| **Nepal** | NPL (SEARO) | 333 (177 to 555) | 1,198 (638 to 1,999) | 0 (0 to 0) | 0 (0 to 0) | 824 (419 to 1,421) | 206 (101 to 362) |
| **Pakistan** | PAK (EMRO) | 17,434 (8,033 to 32,551) | 62,773 (28,934 to 117,136) | 0 (0 to 0) | 0 (0 to 0) | 45,340 (20,123 to 85,733) | 11,909 (5,110 to 22,716) |
| **Peru** | PER (PAHO) | 0 (0 to 0) | 57 (34 to 82) | -8 (-11 to -5) | -31 (-43 to -20) | 38 (22 to 57) | 9 (5 to 14) |
| **Philippines** | PHL (WPRO) | 0 (0 to 0) | 3,831 (2,410 to 6,336) | -69 (-113 to -45) | -276 (-452 to -181) | 2,519 (1,567 to 4,171) | 614 (379 to 1,017) |
| **Papua New Guinea** | PNG (WPRO) | 0 (0 to 0) | 3,782 (1,775 to 6,996) | -14 (-25 to -8) | -58 (-101 to -30) | 2,699 (1,240 to 5,041) | 718 (326 to 1,363) |
| **Korea, North** | PRK (SEARO) | 0 (0 to 0) | 0 (0 to 0) | -137 (-239 to -74) | -550 (-959 to -294) | 0 (0 to 0) | 0 (0 to 0) |
| **Paraguay** | PRY (PAHO) | 107 (57 to 187) | 386 (206 to 673) | 0 (0 to 0) | 0 (0 to 0) | 272 (140 to 482) | 70 (35 to 125) |
| **Rwanda** | RWA (AFRO) | 383 (219 to 648) | 1,379 (789 to 2,332) | 0 (0 to 0) | 0 (0 to 0) | 997 (559 to 1,699) | 259 (143 to 444) |
| **Sudan** | SDN (EMRO) | 2,861 (1,408 to 5,278) | 10,294 (5,070 to 18,986) | 0 (0 to 0) | 0 (0 to 0) | 7,572 (3,667 to 14,065) | 1,992 (952 to 3,716) |
| **Senegal** | SEN (AFRO) | 0 (0 to 0) | 611 (370 to 883) | -54 (-75 to -36) | -215 (-302 to -144) | 442 (259 to 645) | 115 (66 to 168) |
| **Solomon Islands** | SLB (WPRO) | 0 (0 to 0) | 20 (12 to 34) | -1 (-2 to -1) | -4 (-7 to -3) | 13 (8 to 22) | 3 (2 to 5) |
| **Sierra Leone** | SLE (AFRO) | 1,780 (899 to 3,174) | 6,425 (3,239 to 11,465) | 0 (0 to 0) | 0 (0 to 0) | 4,490 (2,223 to 8,055) | 1,130 (552 to 2,036) |
| **El Salvador** | SLV (PAHO) | 0 (0 to 0) | 26 (15 to 41) | -2 (-2 to -1) | -7 (-10 to -4) | 18 (10 to 29) | 5 (3 to 8) |
| **Somalia** | SOM (EMRO) | 2,958 (1,712 to 5,122) | 10,855 (6,286 to 18,786) | 0 (0 to 0) | 0 (0 to 0) | 7,997 (4,600 to 13,862) | 2,130 (1,214 to 3,673) |
| **Serbia** | SRB (EURO) | 0 (0 to 0) | 0 (0 to 0) | -5 (-8 to -2) | -19 (-33 to -9) | 0 (0 to 0) | 0 (0 to 0) |
| **South Sudan** | SSD (AFRO) | 1,416 (1,001 to 2,275) | 5,356 (3,766 to 8,596) | 0 (0 to 0) | 0 (0 to 0) | 3,877 (2,722 to 6,219) | 989 (696 to 1,586) |
| **Sao Tome and Principe** | STP (AFRO) | 0 (0 to 0) | 0 (0 to 0) | -1 (-1 to -1) | -4 (-5 to -2) | 0 (0 to 0) | 0 (0 to 0) |
| **Eswatini** | SWZ (AFRO) | 20 (10 to 37) | 72 (34 to 134) | 0 (0 to 0) | 0 (0 to 0) | 49 (23 to 93) | 12 (6 to 24) |
| **Syria** | SYR (EMRO) | 303 (180 to 542) | 1,094 (651 to 1,956) | 0 (0 to 0) | 0 (0 to 0) | 678 (399 to 1,223) | 161 (94 to 291) |
| **Chad** | TCD (AFRO) | 8,940 (4,158 to 17,782) | 32,496 (15,160 to 64,439) | 0 (0 to 0) | 0 (0 to 0) | 24,050 (11,030 to 48,107) | 6,476 (2,911 to 13,088) |
| **Togo** | TGO (AFRO) | 1,821 (974 to 3,434) | 6,556 (3,510 to 12,350) | 0 (0 to 0) | 0 (0 to 0) | 4,807 (2,533 to 9,146) | 1,267 (658 to 2,434) |
| **Thailand** | THA (SEARO) | 0 (0 to 0) | 0 (0 to 0) | -16 (-23 to -9) | -63 (-92 to -35) | 0 (0 to 0) | 0 (0 to 0) |
| **Tajikistan** | TJK (EURO) | 0 (0 to 0) | 0 (0 to 0) | -32 (-67 to -10) | -130 (-268 to -41) | 0 (0 to 0) | 0 (0 to 0) |
| **Turkmenistan** | TKM (EURO) | 0 (0 to 0) | 0 (0 to 0) | -11 (-18 to -6) | -43 (-74 to -23) | 0 (0 to 0) | 0 (0 to 0) |
| **Timor-Leste** | TLS (SEARO) | 0 (0 to 0) | 68 (37 to 116) | -2 (-4 to -1) | -9 (-15 to -5) | 49 (27 to 85) | 13 (7 to 22) |
| **Tonga** | TON (WPRO) | 0 (0 to 0) | 0 (0 to 0) | -1 (-1 to 0) | -3 (-5 to -2) | 0 (0 to 0) | 0 (0 to 0) |
| **Tunisia** | TUN (EMRO) | 0 (0 to 0) | 24 (16 to 37) | -2 (-4 to -1) | -9 (-14 to -6) | 15 (10 to 23) | 3 (2 to 5) |
| **Tuvalu** | TUV (WPRO) | 0 (0 to 0) | 0 (0 to 0) | 0 (0 to 0) | 0 (0 to 0) | 0 (0 to 0) | 0 (0 to 0) |
| **Tanzania** | TZA (AFRO) | 2,639 (1,082 to 4,602) | 9,496 (3,895 to 16,559) | 0 (0 to 0) | 0 (0 to 0) | 6,933 (2,687 to 12,214) | 1,822 (677 to 3,250) |
| **Uganda** | UGA (AFRO) | 2,131 (1,032 to 4,127) | 7,676 (3,718 to 14,863) | 0 (0 to 0) | 0 (0 to 0) | 5,149 (2,438 to 10,085) | 1,266 (590 to 2,499) |
| **Ukraine** | UKR (EURO) | 0 (0 to 0) | 482 (237 to 856) | -14 (-23 to -7) | -54 (-92 to -28) | 324 (156 to 579) | 80 (38 to 144) |
| **Uzbekistan** | UZB (EURO) | 0 (0 to 0) | 0 (0 to 0) | -153 (-360 to -50) | -611 (-1,442 to -201) | 0 (0 to 0) | 0 (0 to 0) |
| **Venezuela** | VEN (PAHO) | 0 (0 to 0) | 396 (170 to 716) | -7 (-12 to -4) | -28 (-48 to -14) | 270 (110 to 493) | 68 (27 to 124) |
| **Viet Nam** | VNM (WPRO) | 0 (0 to 0) | 2,808 (1,285 to 4,831) | -237 (-393 to -124) | -948 (-1,571 to -498) | 1,968 (873 to 3,419) | 498 (216 to 870) |
| **Vanuatu** | VUT (WPRO) | 0 (0 to 0) | 25 (8 to 52) | -3 (-5 to -1) | -10 (-20 to -4) | 18 (6 to 38) | 5 (1 to 10) |
| **Samoa** | WSM (WPRO) | 0 (0 to 0) | 13 (7 to 23) | 0 (-1 to 0) | -2 (-3 to -1) | 9 (5 to 16) | 2 (1 to 4) |
| **Yemen** | YEM (EMRO) | 1,189 (596 to 2,066) | 4,280 (2,147 to 7,434) | 0 (0 to 0) | 0 (0 to 0) | 3,102 (1,525 to 5,450) | 817 (396 to 1,449) |
| **South Africa** | ZAF (AFRO) | 2,592 (1,138 to 4,588) | 9,331 (4,101 to 16,507) | 0 (0 to 0) | 0 (0 to 0) | 6,682 (2,818 to 11,947) | 1,743 (710 to 3,137) |
| **Zambia** | ZMB (AFRO) | 0 (0 to 0) | 0 (0 to 0) | -43 (-63 to -23) | -170 (-251 to -93) | 0 (0 to 0) | 0 (0 to 0) |
| **Zimbabwe** | ZWE (AFRO) | 373 (201 to 610) | 1,343 (722 to 2,196) | 0 (0 to 0) | 0 (0 to 0) | 900 (475 to 1,482) | 222 (115 to 368) |
| **Infant HBV vaccine series scaled up to 100% coverage in 2020** | | | | | | | |
| **Afghanistan** | AFG (EMRO) | 0 (0 to 0) | 2,894 (1,501 to 5,285) | -20 (-34 to -11) | -80 (-137 to -45) | 2,093 (1,067 to 3,853) | 541 (272 to 1,000) |
| **Angola** | AGO (AFRO) | 5,078 (2,228 to 10,101) | 18,269 (8,022 to 36,313) | 0 (0 to 0) | 0 (0 to 0) | 13,419 (5,760 to 27,043) | 3,516 (1,484 to 7,160) |
| **Albania** | ALB (EURO) | 0 (0 to 0) | 0 (0 to 0) | 0 (-1 to 0) | -2 (-3 to -1) | 0 (0 to 0) | 0 (0 to 0) |
| **Armenia** | ARM (EURO) | 0 (0 to 0) | 0 (0 to 0) | -3 (-6 to -1) | -12 (-22 to -5) | 0 (0 to 0) | 0 (0 to 0) |
| **Azerbaijan** | AZE (EURO) | 0 (0 to 0) | 0 (0 to 0) | -26 (-43 to -13) | -102 (-170 to -52) | 0 (0 to 0) | 0 (0 to 0) |
| **Burundi** | BDI (AFRO) | 501 (282 to 821) | 1,804 (1,015 to 2,953) | 0 (0 to 0) | 0 (0 to 0) | 1,321 (729 to 2,192) | 346 (188 to 580) |
| **Benin** | BEN (AFRO) | 2,365 (1,240 to 5,021) | 8,512 (4,464 to 18,061) | 0 (0 to 0) | 0 (0 to 0) | 6,020 (3,122 to 12,917) | 1,531 (787 to 3,315) |
| **Burkina Faso** | BFA (AFRO) | 1,637 (984 to 2,551) | 5,893 (3,544 to 9,182) | 0 (0 to 0) | 0 (0 to 0) | 4,169 (2,455 to 6,625) | 1,057 (613 to 1,710) |
| **Bangladesh** | BGD (SEARO) | 4,149 (2,480 to 6,697) | 14,932 (8,926 to 24,098) | 0 (0 to 0) | 0 (0 to 0) | 10,620 (6,261 to 17,273) | 2,722 (1,586 to 4,465) |
| **Bosnia and Herzegovina** | BIH (EURO) | 13 (7 to 22) | 47 (24 to 79) | 0 (0 to 0) | 0 (0 to 0) | 33 (17 to 56) | 8 (4 to 14) |
| **Belarus** | BLR (EURO) | 0 (0 to 0) | 0 (0 to 0) | -7 (-13 to -3) | -28 (-53 to -13) | 0 (0 to 0) | 0 (0 to 0) |
| **Belize** | BLZ (PAHO) | 0 (0 to 0) | 1 (1 to 2) | 0 (0 to 0) | 0 (0 to 0) | 1 (0 to 1) | 0 (0 to 0) |
| **Bolivia** | BOL (PAHO) | 108 (49 to 209) | 387 (177 to 753) | 0 (0 to 0) | 0 (0 to 0) | 274 (120 to 546) | 70 (30 to 142) |
| **Bhutan** | BTN (SEARO) | 0 (0 to 0) | 3 (1 to 6) | -1 (-2 to 0) | -4 (-6 to -2) | 2 (1 to 4) | 0 (0 to 1) |
| **Central African Republic** | CAF (AFRO) | 965 (452 to 1,930) | 3,473 (1,627 to 6,932) | 0 (0 to 0) | 0 (0 to 0) | 2,551 (1,178 to 5,136) | 667 (304 to 1,355) |
| **China** | CHN (WPRO) | 0 (0 to 0) | 0 (0 to 0) | -1,407 (-2,415 to -757) | -5,631 (-9,661 to -3,026) | 0 (0 to 0) | 0 (0 to 0) |
| **Ivory Coast** | CIV (AFRO) | 1,920 (852 to 3,199) | 9,717 (4,311 to 16,179) | -10 (-16 to -5) | -39 (-63 to -21) | 7,153 (3,076 to 12,010) | 1,880 (791 to 3,173) |
| **Cameroon** | CMR (AFRO) | 3,848 (1,815 to 6,411) | 13,843 (6,534 to 23,056) | 0 (0 to 0) | 0 (0 to 0) | 10,105 (4,613 to 16,930) | 2,638 (1,175 to 4,445) |
| **Democratic Republic of the Congo** | COD (AFRO) | 9,045 (4,004 to 17,704) | 32,547 (14,412 to 63,684) | 0 (0 to 0) | 0 (0 to 0) | 23,848 (10,344 to 47,165) | 6,237 (2,658 to 12,437) |
| **Congo** | COG (AFRO) | 839 (361 to 1,701) | 3,019 (1,299 to 6,113) | 0 (0 to 0) | 0 (0 to 0) | 2,190 (908 to 4,524) | 568 (229 to 1,197) |
| **Colombia** | COL (PAHO) | 0 (0 to 0) | 11 (7 to 16) | -1 (-2 to -1) | -5 (-7 to -3) | 7 (4 to 11) | 2 (1 to 3) |
| **Comoros** | COM (AFRO) | 37 (18 to 70) | 133 (63 to 251) | 0 (0 to 0) | 0 (0 to 0) | 92 (43 to 176) | 23 (11 to 44) |
| **Cape Verde** | CPV (AFRO) | 0 (0 to 0) | 0 (0 to 0) | -3 (-6 to -2) | -13 (-23 to -7) | 0 (0 to 0) | 0 (0 to 0) |
| **Cuba** | CUB (PAHO) | 0 (0 to 0) | 0 (0 to 0) | 0 (0 to 0) | -1 (-2 to -1) | 0 (0 to 0) | 0 (0 to 0) |
| **Djibouti** | DJI (EMRO) | 0 (0 to 0) | 0 (0 to 0) | -2 (-3 to -1) | -8 (-13 to -5) | 0 (0 to 0) | 0 (0 to 0) |
| **Algeria** | DZA (AFRO) | 0 (0 to 0) | 0 (0 to 0) | -79 (-149 to -34) | -316 (-595 to -135) | 0 (0 to 0) | 0 (0 to 0) |
| **Ecuador** | ECU (PAHO) | 0 (0 to 0) | 247 (119 to 402) | -11 (-16 to -6) | -42 (-66 to -24) | 175 (81 to 289) | 44 (20 to 74) |
| **Egypt** | EGY (EMRO) | 0 (0 to 0) | 0 (0 to 0) | -15 (-21 to -11) | -60 (-84 to -42) | 0 (0 to 0) | 0 (0 to 0) |
| **Eritrea** | ERI (AFRO) | 132 (73 to 221) | 475 (262 to 796) | 0 (0 to 0) | 0 (0 to 0) | 335 (178 to 573) | 85 (44 to 148) |
| **Ethiopia** | ETH (AFRO) | 5,098 (2,542 to 9,275) | 18,353 (9,152 to 33,387) | 0 (0 to 0) | 0 (0 to 0) | 13,065 (6,431 to 23,890) | 3,325 (1,621 to 6,105) |
| **Fiji** | FJI (WPRO) | 0 (0 to 0) | 0 (0 to 0) | -1 (-2 to -1) | -5 (-8 to -2) | 0 (0 to 0) | 0 (0 to 0) |
| **Micronesia** | FSM (WPRO) | 0 (0 to 0) | 5 (2 to 10) | 0 (0 to 0) | -1 (-2 to 0) | 4 (1 to 7) | 1 (0 to 2) |
| **Georgia** | GEO (EURO) | 0 (0 to 0) | 0 (0 to 0) | -4 (-7 to -2) | -17 (-29 to -9) | 0 (0 to 0) | 0 (0 to 0) |
| **Ghana** | GHA (AFRO) | 4,322 (2,668 to 6,696) | 15,547 (9,601 to 24,080) | 0 (0 to 0) | 0 (0 to 0) | 11,333 (6,917 to 17,679) | 2,956 (1,783 to 4,640) |
| **Guinea** | GIN (AFRO) | 5,442 (2,342 to 9,867) | 19,559 (8,430 to 35,398) | 0 (0 to 0) | 0 (0 to 0) | 14,261 (6,029 to 26,019) | 3,723 (1,552 to 6,838) |
| **Gambia** | GMB (AFRO) | 145 (45 to 293) | 521 (162 to 1,054) | 0 (0 to 0) | 0 (0 to 0) | 369 (107 to 768) | 94 (26 to 201) |
| **Guinea-Bissau** | GNB (AFRO) | 350 (183 to 595) | 1,260 (660 to 2,138) | 0 (0 to 0) | 0 (0 to 0) | 922 (477 to 1,587) | 241 (123 to 421) |
| **Guatemala** | GTM (PAHO) | 0 (0 to 0) | 130 (91 to 185) | -2 (-3 to -1) | -8 (-11 to -6) | 88 (61 to 126) | 22 (15 to 31) |
| **Guyana** | GUY (PAHO) | 14 (7 to 25) | 49 (25 to 90) | 0 (0 to 0) | 0 (0 to 0) | 35 (17 to 64) | 9 (4 to 16) |
| **Honduras** | HND (PAHO) | 0 (0 to 0) | 153 (77 to 269) | -10 (-16 to -6) | -39 (-66 to -22) | 106 (52 to 186) | 26 (13 to 47) |
| **Haiti** | HTI (PAHO) | 453 (203 to 840) | 1,629 (731 to 3,023) | 0 (0 to 0) | 0 (0 to 0) | 1,174 (523 to 2,188) | 303 (134 to 568) |
| **Indonesia** | IDN (SEARO) | 0 (0 to 0) | 2,287 (1,233 to 4,481) | -464 (-860 to -264) | -1,856 (-3,441 to -1,055) | 1,550 (827 to 3,073) | 385 (205 to 770) |
| **India** | IND (SEARO) | 0 (0 to 0) | 69,274 (33,820 to 121,359) | -1,147 (-1,975 to -586) | -4,589 (-7,903 to -2,345) | 50,028 (24,130 to 88,016) | 12,920 (6,162 to 22,820) |
| **Iran** | IRN (EMRO) | 0 (0 to 0) | 0 (0 to 0) | -38 (-52 to -24) | -150 (-210 to -98) | 0 (0 to 0) | 0 (0 to 0) |
| **Iraq** | IRQ (EMRO) | 0 (0 to 0) | 1,063 (418 to 2,133) | -15 (-28 to -6) | -59 (-111 to -26) | 694 (264 to 1,423) | 168 (62 to 349) |
| **Jamaica** | JAM (PAHO) | 19 (9 to 34) | 68 (33 to 121) | 0 (0 to 0) | 0 (0 to 0) | 47 (23 to 85) | 12 (6 to 21) |
| **Jordan** | JOR (EMRO) | 27 (19 to 40) | 99 (67 to 142) | 0 (0 to 0) | 0 (0 to 0) | 70 (47 to 103) | 18 (12 to 27) |
| **Kenya** | KEN (AFRO) | 347 (227 to 514) | 1,249 (817 to 1,850) | 0 (0 to 0) | 0 (0 to 0) | 835 (536 to 1,238) | 204 (129 to 305) |
| **Kyrgyzstan** | KGZ (EURO) | 0 (0 to 0) | 0 (0 to 0) | -18 (-37 to -8) | -73 (-146 to -30) | 0 (0 to 0) | 0 (0 to 0) |
| **Cambodia** | KHM (WPRO) | 0 (0 to 0) | 55 (32 to 89) | -30 (-44 to -18) | -118 (-178 to -74) | 38 (21 to 62) | 9 (5 to 16) |
| **Kiribati** | KIR (WPRO) | 0 (0 to 0) | 0 (0 to 0) | -1 (-1 to 0) | -2 (-5 to -1) | 0 (0 to 0) | 0 (0 to 0) |
| **Laos** | LAO (WPRO) | 0 (0 to 0) | 470 (274 to 778) | -8 (-12 to -5) | -32 (-49 to -20) | 336 (192 to 564) | 87 (49 to 146) |
| **Liberia** | LBR (AFRO) | 1,843 (854 to 3,585) | 6,627 (3,077 to 12,861) | 0 (0 to 0) | 0 (0 to 0) | 4,788 (2,145 to 9,423) | 1,241 (541 to 2,467) |
| **Sri Lanka** | LKA (SEARO) | 230 (115 to 413) | 828 (413 to 1,486) | 0 (0 to 0) | 0 (0 to 0) | 568 (277 to 1,037) | 141 (67 to 262) |
| **Lesotho** | LSO (AFRO) | 78 (36 to 147) | 279 (130 to 528) | 0 (0 to 0) | 0 (0 to 0) | 196 (88 to 381) | 50 (22 to 99) |
| **Morocco** | MAR (EMRO) | 0 (0 to 0) | 84 (48 to 129) | -1 (-1 to -1) | -4 (-5 to -2) | 58 (32 to 91) | 15 (8 to 23) |
| **Moldova** | MDA (EURO) | 0 (0 to 0) | 0 (0 to 0) | -13 (-23 to -8) | -52 (-91 to -30) | 0 (0 to 0) | 0 (0 to 0) |
| **Madagascar** | MDG (AFRO) | 2,319 (1,412 to 3,657) | 8,345 (5,081 to 13,158) | 0 (0 to 0) | 0 (0 to 0) | 6,113 (3,698 to 9,702) | 1,598 (959 to 2,547) |
| **Marshall Islands** | MHL (WPRO) | 0 (0 to 0) | 0 (0 to 0) | 0 (-1 to 0) | -1 (-2 to -1) | 0 (0 to 0) | 0 (0 to 0) |
| **North Macedonia** | MKD (EURO) | 0 (0 to 0) | 0 (0 to 0) | -2 (-3 to -1) | -6 (-11 to -4) | 0 (0 to 0) | 0 (0 to 0) |
| **Mali** | MLI (AFRO) | 1,297 (667 to 2,227) | 4,668 (2,402 to 8,017) | 0 (0 to 0) | 0 (0 to 0) | 3,258 (1,653 to 5,674) | 822 (413 to 1,445) |
| **Myanmar** | MMR (SEARO) | 1,148 (591 to 2,031) | 10,476 (5,393 to 18,519) | -29 (-48 to -16) | -115 (-192 to -64) | 7,310 (3,684 to 13,142) | 1,841 (912 to 3,355) |
| **Mongolia** | MNG (WPRO) | 0 (0 to 0) | 0 (0 to 0) | -8 (-16 to -3) | -31 (-64 to -13) | 0 (0 to 0) | 0 (0 to 0) |
| **Mozambique** | MOZ (AFRO) | 4,131 (2,264 to 7,235) | 14,861 (8,149 to 26,018) | 0 (0 to 0) | 0 (0 to 0) | 10,946 (5,916 to 19,330) | 2,876 (1,545 to 5,116) |
| **Mauritania** | MRT (AFRO) | 1,134 (588 to 2,138) | 4,077 (2,116 to 7,682) | 0 (0 to 0) | 0 (0 to 0) | 2,994 (1,528 to 5,687) | 785 (397 to 1,499) |
| **Malawi** | MWI (AFRO) | 418 (244 to 671) | 1,504 (877 to 2,417) | 0 (0 to 0) | 0 (0 to 0) | 1,024 (582 to 1,667) | 255 (142 to 419) |
| **Namibia** | NAM (AFRO) | 0 (0 to 0) | 19 (11 to 34) | -2 (-3 to -1) | -7 (-12 to -4) | 14 (8 to 24) | 4 (2 to 6) |
| **Niger** | NER (AFRO) | 11,644 (5,842 to 20,731) | 41,849 (21,020 to 74,413) | 0 (0 to 0) | 0 (0 to 0) | 30,920 (15,209 to 55,559) | 8,135 (3,921 to 14,785) |
| **Nigeria** | NGA (AFRO) | 41,015 (14,683 to 99,603) | 147,640 (52,860 to 357,992) | 0 (0 to 0) | 0 (0 to 0) | 107,029 (37,835 to 262,127) | 27,686 (9,679 to 68,356) |
| **Nicaragua** | NIC (PAHO) | 6 (4 to 8) | 22 (16 to 30) | 0 (0 to 0) | 0 (0 to 0) | 14 (10 to 20) | 3 (2 to 5) |
| **Nepal** | NPL (SEARO) | 322 (169 to 547) | 1,159 (609 to 1,969) | 0 (0 to 0) | 0 (0 to 0) | 798 (399 to 1,390) | 199 (96 to 353) |
| **Pakistan** | PAK (EMRO) | 15,283 (6,659 to 29,062) | 54,995 (23,969 to 104,538) | 0 (0 to 0) | 0 (0 to 0) | 39,634 (16,638 to 76,309) | 10,256 (4,177 to 19,901) |
| **Peru** | PER (PAHO) | 0 (0 to 0) | 52 (31 to 76) | -7 (-10 to -5) | -29 (-41 to -19) | 35 (20 to 52) | 9 (5 to 13) |
| **Philippines** | PHL (WPRO) | 0 (0 to 0) | 2,796 (1,739 to 4,646) | -55 (-91 to -36) | -220 (-362 to -143) | 1,838 (1,131 to 3,057) | 445 (272 to 739) |
| **Papua New Guinea** | PNG (WPRO) | 0 (0 to 0) | 2,477 (1,036 to 5,405) | -10 (-20 to -5) | -41 (-80 to -19) | 1,773 (728 to 3,936) | 456 (185 to 1,026) |
| **Korea, North** | PRK (SEARO) | 0 (0 to 0) | 0 (0 to 0) | -136 (-237 to -72) | -545 (-950 to -290) | 0 (0 to 0) | 0 (0 to 0) |
| **Paraguay** | PRY (PAHO) | 102 (52 to 183) | 367 (189 to 657) | 0 (0 to 0) | 0 (0 to 0) | 259 (128 to 470) | 66 (32 to 121) |
| **Rwanda** | RWA (AFRO) | 381 (217 to 645) | 1,373 (782 to 2,321) | 0 (0 to 0) | 0 (0 to 0) | 992 (554 to 1,689) | 257 (142 to 441) |
| **Sudan** | SDN (EMRO) | 2,819 (1,363 to 5,216) | 10,145 (4,906 to 18,765) | 0 (0 to 0) | 0 (0 to 0) | 7,458 (3,546 to 13,886) | 1,955 (917 to 3,654) |
| **Senegal** | SEN (AFRO) | 0 (0 to 0) | 590 (352 to 855) | -53 (-74 to -35) | -211 (-294 to -140) | 427 (246 to 624) | 110 (62 to 164) |
| **Solomon Islands** | SLB (WPRO) | 0 (0 to 0) | 19 (11 to 33) | -1 (-2 to -1) | -4 (-7 to -2) | 12 (7 to 21) | 3 (2 to 5) |
| **Sierra Leone** | SLE (AFRO) | 1,711 (862 to 3,047) | 6,162 (3,101 to 10,988) | 0 (0 to 0) | 0 (0 to 0) | 4,302 (2,126 to 7,716) | 1,081 (527 to 1,950) |
| **El Salvador** | SLV (PAHO) | 0 (0 to 0) | 24 (13 to 38) | -2 (-2 to -1) | -6 (-9 to -4) | 17 (9 to 27) | 4 (2 to 7) |
| **Somalia** | SOM (EMRO) | 2,192 (1,124 to 3,783) | 7,896 (4,051 to 13,631) | 0 (0 to 0) | 0 (0 to 0) | 5,820 (2,983 to 10,045) | 1,525 (781 to 2,636) |
| **Serbia** | SRB (EURO) | 0 (0 to 0) | 0 (0 to 0) | -5 (-8 to -2) | -18 (-32 to -9) | 0 (0 to 0) | 0 (0 to 0) |
| **South Sudan** | SSD (AFRO) | 987 (638 to 1,651) | 3,565 (2,302 to 5,961) | 0 (0 to 0) | 0 (0 to 0) | 2,596 (1,674 to 4,332) | 674 (435 to 1,123) |
| **Sao Tome and Principe** | STP (AFRO) | 0 (0 to 0) | 0 (0 to 0) | -1 (-1 to -1) | -4 (-5 to -2) | 0 (0 to 0) | 0 (0 to 0) |
| **Eswatini** | SWZ (AFRO) | 19 (9 to 35) | 67 (32 to 126) | 0 (0 to 0) | 0 (0 to 0) | 46 (21 to 87) | 11 (5 to 22) |
| **Syria** | SYR (EMRO) | 201 (115 to 369) | 722 (414 to 1,327) | 0 (0 to 0) | 0 (0 to 0) | 447 (253 to 828) | 105 (58 to 195) |
| **Chad** | TCD (AFRO) | 7,072 (2,970 to 14,762) | 25,419 (10,686 to 52,971) | 0 (0 to 0) | 0 (0 to 0) | 18,775 (7,771 to 39,449) | 4,943 (2,017 to 10,479) |
| **Togo** | TGO (AFRO) | 1,707 (892 to 3,265) | 6,140 (3,209 to 11,734) | 0 (0 to 0) | 0 (0 to 0) | 4,497 (2,302 to 8,679) | 1,175 (594 to 2,290) |
| **Thailand** | THA (SEARO) | 0 (0 to 0) | 0 (0 to 0) | -16 (-23 to -9) | -62 (-92 to -35) | 0 (0 to 0) | 0 (0 to 0) |
| **Tajikistan** | TJK (EURO) | 0 (0 to 0) | 0 (0 to 0) | -32 (-67 to -10) | -128 (-266 to -40) | 0 (0 to 0) | 0 (0 to 0) |
| **Turkmenistan** | TKM (EURO) | 0 (0 to 0) | 0 (0 to 0) | -11 (-18 to -6) | -43 (-74 to -23) | 0 (0 to 0) | 0 (0 to 0) |
| **Timor-Leste** | TLS (SEARO) | 0 (0 to 0) | 63 (34 to 107) | -2 (-3 to -1) | -8 (-14 to -5) | 46 (24 to 78) | 12 (6 to 21) |
| **Tonga** | TON (WPRO) | 0 (0 to 0) | 0 (0 to 0) | -1 (-1 to 0) | -3 (-5 to -2) | 0 (0 to 0) | 0 (0 to 0) |
| **Tunisia** | TUN (EMRO) | 0 (0 to 0) | 22 (15 to 35) | -2 (-3 to -1) | -8 (-14 to -5) | 14 (10 to 21) | 3 (2 to 5) |
| **Tuvalu** | TUV (WPRO) | 0 (0 to 0) | 0 (0 to 0) | 0 (0 to 0) | 0 (0 to 0) | 0 (0 to 0) | 0 (0 to 0) |
| **Tanzania** | TZA (AFRO) | 2,539 (1,002 to 4,472) | 9,140 (3,609 to 16,094) | 0 (0 to 0) | 0 (0 to 0) | 6,667 (2,485 to 11,884) | 1,741 (622 to 3,129) |
| **Uganda** | UGA (AFRO) | 2,025 (978 to 3,919) | 7,290 (3,523 to 14,107) | 0 (0 to 0) | 0 (0 to 0) | 4,885 (2,306 to 9,563) | 1,197 (557 to 2,363) |
| **Ukraine** | UKR (EURO) | 0 (0 to 0) | 423 (202 to 756) | -12 (-21 to -6) | -50 (-86 to -26) | 284 (133 to 513) | 70 (32 to 127) |
| **Uzbekistan** | UZB (EURO) | 0 (0 to 0) | 0 (0 to 0) | -151 (-356 to -50) | -602 (-1,424 to -198) | 0 (0 to 0) | 0 (0 to 0) |
| **Venezuela** | VEN (PAHO) | 0 (0 to 0) | 336 (129 to 614) | -6 (-11 to -3) | -25 (-44 to -12) | 229 (84 to 419) | 57 (20 to 104) |
| **Viet Nam** | VNM (WPRO) | 0 (0 to 0) | 2,657 (1,179 to 4,616) | -229 (-380 to -118) | -915 (-1,520 to -471) | 1,861 (800 to 3,262) | 469 (197 to 827) |
| **Vanuatu** | VUT (WPRO) | 0 (0 to 0) | 24 (8 to 50) | -2 (-5 to -1) | -10 (-19 to -4) | 17 (5 to 37) | 4 (1 to 10) |
| **Samoa** | WSM (WPRO) | 0 (0 to 0) | 10 (6 to 19) | 0 (-1 to 0) | -2 (-3 to -1) | 7 (4 to 13) | 2 (1 to 3) |
| **Yemen** | YEM (EMRO) | 1,086 (520 to 1,955) | 3,909 (1,872 to 7,033) | 0 (0 to 0) | 0 (0 to 0) | 2,827 (1,327 to 5,145) | 733 (339 to 1,346) |
| **South Africa** | ZAF (AFRO) | 2,391 (973 to 4,364) | 8,605 (3,503 to 15,697) | 0 (0 to 0) | 0 (0 to 0) | 6,152 (2,377 to 11,337) | 1,586 (591 to 2,944) |
| **Zambia** | ZMB (AFRO) | 0 (0 to 0) | 0 (0 to 0) | -41 (-61 to -22) | -163 (-242 to -88) | 0 (0 to 0) | 0 (0 to 0) |
| **Zimbabwe** | ZWE (AFRO) | 346 (186 to 566) | 1,247 (671 to 2,039) | 0 (0 to 0) | 0 (0 to 0) | 835 (440 to 1,374) | 205 (106 to 340) |
| **Treatment level such that 40% of treatment-eligible individuals are in treatment in 2030** | | | | | | | |
| **Afghanistan** | AFG (EMRO) | 0 (0 to 0) | 2,040 (1,536 to 2,456) | -14 (-17 to -11) | -57 (-68 to -45) | 1,463 (1,089 to 1,777) | 382 (280 to 467) |
| **Angola** | AGO (AFRO) | 3,613 (2,527 to 4,353) | 13,039 (9,139 to 15,674) | 0 (0 to 0) | 0 (0 to 0) | 9,528 (6,483 to 11,607) | 2,545 (1,685 to 3,139) |
| **Albania** | ALB (EURO) | 0 (0 to 0) | 0 (0 to 0) | 0 (0 to 0) | -1 (-2 to -1) | 0 (0 to 0) | 0 (0 to 0) |
| **Armenia** | ARM (EURO) | 0 (0 to 0) | 0 (0 to 0) | -2 (-3 to -1) | -8 (-13 to -5) | 0 (0 to 0) | 0 (0 to 0) |
| **Azerbaijan** | AZE (EURO) | 0 (0 to 0) | 0 (0 to 0) | -16 (-23 to -11) | -66 (-90 to -44) | 0 (0 to 0) | 0 (0 to 0) |
| **Burundi** | BDI (AFRO) | 308 (240 to 347) | 1,108 (863 to 1,248) | 0 (0 to 0) | 0 (0 to 0) | 805 (611 to 913) | 210 (157 to 240) |
| **Benin** | BEN (AFRO) | 1,682 (1,262 to 2,372) | 6,086 (4,564 to 8,559) | 0 (0 to 0) | 0 (0 to 0) | 4,297 (3,170 to 6,205) | 1,098 (800 to 1,622) |
| **Burkina Faso** | BFA (AFRO) | 1,112 (841 to 1,429) | 4,005 (3,029 to 5,145) | 0 (0 to 0) | 0 (0 to 0) | 2,809 (2,082 to 3,679) | 711 (520 to 945) |
| **Bangladesh** | BGD (SEARO) | 2,552 (2,236 to 2,797) | 9,186 (8,049 to 10,068) | 0 (0 to 0) | 0 (0 to 0) | 6,478 (5,610 to 7,133) | 1,652 (1,417 to 1,827) |
| **Bosnia and Herzegovina** | BIH (EURO) | 8 (6 to 10) | 30 (22 to 36) | 0 (0 to 0) | 0 (0 to 0) | 21 (15 to 26) | 5 (4 to 7) |
| **Belarus** | BLR (EURO) | 0 (0 to 0) | 0 (0 to 0) | -5 (-7 to -3) | -18 (-28 to -10) | 0 (0 to 0) | 0 (0 to 0) |
| **Belize** | BLZ (PAHO) | 0 (0 to 0) | 1 (1 to 1) | 0 (0 to 0) | 0 (0 to 0) | 0 (0 to 1) | 0 (0 to 0) |
| **Bolivia** | BOL (PAHO) | 79 (46 to 109) | 285 (166 to 391) | 0 (0 to 0) | 0 (0 to 0) | 200 (110 to 281) | 51 (27 to 74) |
| **Bhutan** | BTN (SEARO) | 0 (0 to 0) | 2 (1 to 3) | -1 (-1 to 0) | -2 (-3 to -2) | 1 (1 to 2) | 0 (0 to 0) |
| **Central African Republic** | CAF (AFRO) | 736 (484 to 951) | 2,680 (1,766 to 3,445) | 0 (0 to 0) | 0 (0 to 0) | 1,958 (1,283 to 2,544) | 519 (335 to 681) |
| **China** | CHN (WPRO) | 0 (0 to 0) | 0 (0 to 0) | -1,058 (-1,619 to -624) | -4,232 (-6,475 to -2,496) | 0 (0 to 0) | 0 (0 to 0) |
| **Ivory Coast** | CIV (AFRO) | 1,221 (769 to 1,449) | 6,180 (3,894 to 7,332) | -6 (-7 to -5) | -26 (-30 to -19) | 4,521 (2,765 to 5,404) | 1,193 (714 to 1,432) |
| **Cameroon** | CMR (AFRO) | 2,595 (1,740 to 3,166) | 9,344 (6,272 to 11,396) | 0 (0 to 0) | 0 (0 to 0) | 6,770 (4,418 to 8,326) | 1,791 (1,136 to 2,223) |
| **Democratic Republic of the Congo** | COD (AFRO) | 5,923 (4,385 to 7,898) | 21,330 (15,815 to 28,414) | 0 (0 to 0) | 0 (0 to 0) | 15,510 (11,159 to 20,862) | 4,137 (2,885 to 5,612) |
| **Congo** | COG (AFRO) | 532 (345 to 672) | 1,918 (1,244 to 2,419) | 0 (0 to 0) | 0 (0 to 0) | 1,382 (868 to 1,776) | 360 (220 to 470) |
| **Colombia** | COL (PAHO) | 0 (0 to 0) | 8 (7 to 9) | -1 (-1 to -1) | -4 (-4 to -3) | 5 (4 to 6) | 1 (1 to 1) |
| **Comoros** | COM (AFRO) | 23 (15 to 34) | 84 (54 to 122) | 0 (0 to 0) | 0 (0 to 0) | 58 (36 to 86) | 14 (9 to 22) |
| **Cape Verde** | CPV (AFRO) | 0 (0 to 0) | 0 (0 to 0) | -2 (-3 to -1) | -9 (-11 to -6) | 0 (0 to 0) | 0 (0 to 0) |
| **Cuba** | CUB (PAHO) | 0 (0 to 0) | 0 (0 to 0) | 0 (0 to 0) | -1 (-1 to -1) | 0 (0 to 0) | 0 (0 to 0) |
| **Djibouti** | DJI (EMRO) | 0 (0 to 0) | 0 (0 to 0) | -1 (-2 to -1) | -5 (-6 to -4) | 0 (0 to 0) | 0 (0 to 0) |
| **Algeria** | DZA (AFRO) | 0 (0 to 0) | 0 (0 to 0) | -50 (-77 to -29) | -202 (-306 to -117) | 0 (0 to 0) | 0 (0 to 0) |
| **Ecuador** | ECU (PAHO) | 0 (0 to 0) | 159 (101 to 200) | -7 (-9 to -5) | -29 (-34 to -21) | 112 (68 to 142) | 28 (17 to 36) |
| **Egypt** | EGY (EMRO) | 0 (0 to 0) | 0 (0 to 0) | -12 (-13 to -10) | -47 (-53 to -41) | 0 (0 to 0) | 0 (0 to 0) |
| **Eritrea** | ERI (AFRO) | 82 (50 to 115) | 294 (178 to 416) | 0 (0 to 0) | 0 (0 to 0) | 205 (118 to 300) | 52 (29 to 78) |
| **Ethiopia** | ETH (AFRO) | 4,051 (2,701 to 5,442) | 14,614 (9,740 to 19,637) | 0 (0 to 0) | 0 (0 to 0) | 10,336 (6,809 to 13,973) | 2,642 (1,723 to 3,594) |
| **Fiji** | FJI (WPRO) | 0 (0 to 0) | 0 (0 to 0) | -1 (-1 to 0) | -3 (-4 to -2) | 0 (0 to 0) | 0 (0 to 0) |
| **Micronesia** | FSM (WPRO) | 0 (0 to 0) | 4 (1 to 5) | 0 (0 to 0) | -1 (-1 to 0) | 2 (1 to 3) | 1 (0 to 1) |
| **Georgia** | GEO (EURO) | 0 (0 to 0) | 0 (0 to 0) | -3 (-4 to -2) | -11 (-14 to -7) | 0 (0 to 0) | 0 (0 to 0) |
| **Ghana** | GHA (AFRO) | 2,749 (2,178 to 3,269) | 9,891 (7,840 to 11,763) | 0 (0 to 0) | 0 (0 to 0) | 7,160 (5,561 to 8,563) | 1,860 (1,421 to 2,237) |
| **Guinea** | GIN (AFRO) | 3,916 (2,640 to 5,028) | 14,224 (9,644 to 18,244) | 0 (0 to 0) | 0 (0 to 0) | 10,302 (6,797 to 13,319) | 2,732 (1,752 to 3,564) |
| **Gambia** | GMB (AFRO) | 107 (40 to 197) | 387 (143 to 708) | 0 (0 to 0) | 0 (0 to 0) | 273 (93 to 516) | 70 (22 to 135) |
| **Guinea-Bissau** | GNB (AFRO) | 221 (159 to 285) | 797 (574 to 1,026) | 0 (0 to 0) | 0 (0 to 0) | 578 (408 to 750) | 152 (105 to 197) |
| **Guatemala** | GTM (PAHO) | 0 (0 to 0) | 108 (91 to 129) | -2 (-2 to -1) | -7 (-8 to -6) | 73 (61 to 88) | 18 (15 to 22) |
| **Guyana** | GUY (PAHO) | 8 (5 to 10) | 30 (18 to 37) | 0 (0 to 0) | 0 (0 to 0) | 21 (12 to 26) | 5 (3 to 7) |
| **Honduras** | HND (PAHO) | 0 (0 to 0) | 98 (59 to 127) | -6 (-8 to -5) | -26 (-31 to -18) | 67 (39 to 88) | 17 (10 to 22) |
| **Haiti** | HTI (PAHO) | 323 (230 to 387) | 1,165 (830 to 1,394) | 0 (0 to 0) | 0 (0 to 0) | 838 (592 to 1,005) | 221 (155 to 265) |
| **Indonesia** | IDN (SEARO) | 0 (0 to 0) | 1,544 (1,175 to 2,321) | -306 (-433 to -241) | -1,222 (-1,731 to -966) | 1,047 (790 to 1,594) | 262 (196 to 402) |
| **India** | IND (SEARO) | 0 (0 to 0) | 45,755 (22,214 to 62,606) | -765 (-1,033 to -392) | -3,060 (-4,132 to -1,568) | 32,957 (15,794 to 45,271) | 8,523 (4,036 to 11,743) |
| **Iran** | IRN (EMRO) | 0 (0 to 0) | 0 (0 to 0) | -27 (-32 to -20) | -110 (-128 to -82) | 0 (0 to 0) | 0 (0 to 0) |
| **Iraq** | IRQ (EMRO) | 0 (0 to 0) | 766 (430 to 1,501) | -10 (-18 to -6) | -41 (-70 to -25) | 501 (277 to 1,014) | 122 (66 to 252) |
| **Jamaica** | JAM (PAHO) | 12 (8 to 15) | 45 (29 to 56) | 0 (0 to 0) | 0 (0 to 0) | 31 (20 to 39) | 8 (5 to 10) |
| **Jordan** | JOR (EMRO) | 21 (17 to 25) | 75 (61 to 89) | 0 (0 to 0) | 0 (0 to 0) | 54 (42 to 65) | 14 (11 to 17) |
| **Kenya** | KEN (AFRO) | 252 (188 to 322) | 907 (677 to 1,158) | 0 (0 to 0) | 0 (0 to 0) | 603 (443 to 782) | 147 (107 to 193) |
| **Kyrgyzstan** | KGZ (EURO) | 0 (0 to 0) | 0 (0 to 0) | -12 (-17 to -7) | -47 (-69 to -27) | 0 (0 to 0) | 0 (0 to 0) |
| **Cambodia** | KHM (WPRO) | 0 (0 to 0) | 37 (28 to 46) | -21 (-24 to -17) | -83 (-96 to -68) | 25 (18 to 32) | 6 (4 to 8) |
| **Kiribati** | KIR (WPRO) | 0 (0 to 0) | 0 (0 to 0) | 0 (-1 to 0) | -2 (-2 to -1) | 0 (0 to 0) | 0 (0 to 0) |
| **Laos** | LAO (WPRO) | 0 (0 to 0) | 324 (243 to 379) | -6 (-6 to -5) | -23 (-26 to -19) | 230 (167 to 270) | 60 (42 to 70) |
| **Liberia** | LBR (AFRO) | 1,143 (818 to 1,500) | 4,132 (2,967 to 5,404) | 0 (0 to 0) | 0 (0 to 0) | 2,966 (2,063 to 3,945) | 772 (519 to 1,042) |
| **Sri Lanka** | LKA (SEARO) | 135 (99 to 173) | 486 (356 to 624) | 0 (0 to 0) | 0 (0 to 0) | 330 (239 to 434) | 81 (58 to 109) |
| **Lesotho** | LSO (AFRO) | 51 (31 to 70) | 183 (111 to 251) | 0 (0 to 0) | 0 (0 to 0) | 128 (73 to 180) | 33 (18 to 47) |
| **Morocco** | MAR (EMRO) | 0 (0 to 0) | 60 (38 to 81) | -1 (-1 to 0) | -3 (-3 to -2) | 42 (25 to 57) | 11 (6 to 15) |
| **Moldova** | MDA (EURO) | 0 (0 to 0) | 0 (0 to 0) | -8 (-9 to -6) | -32 (-38 to -23) | 0 (0 to 0) | 0 (0 to 0) |
| **Madagascar** | MDG (AFRO) | 1,549 (1,332 to 1,721) | 5,576 (4,797 to 6,195) | 0 (0 to 0) | 0 (0 to 0) | 4,071 (3,463 to 4,547) | 1,069 (903 to 1,196) |
| **Marshall Islands** | MHL (WPRO) | 0 (0 to 0) | 0 (0 to 0) | 0 (0 to 0) | -1 (-1 to -1) | 0 (0 to 0) | 0 (0 to 0) |
| **North Macedonia** | MKD (EURO) | 0 (0 to 0) | 0 (0 to 0) | -1 (-1 to -1) | -4 (-6 to -3) | 0 (0 to 0) | 0 (0 to 0) |
| **Mali** | MLI (AFRO) | 1,073 (702 to 1,446) | 3,869 (2,529 to 5,210) | 0 (0 to 0) | 0 (0 to 0) | 2,680 (1,713 to 3,669) | 677 (426 to 938) |
| **Myanmar** | MMR (SEARO) | 723 (518 to 1,023) | 6,603 (4,732 to 9,342) | -19 (-24 to -14) | -74 (-97 to -56) | 4,569 (3,230 to 6,597) | 1,149 (803 to 1,685) |
| **Mongolia** | MNG (WPRO) | 0 (0 to 0) | 0 (0 to 0) | -5 (-10 to -3) | -21 (-39 to -11) | 0 (0 to 0) | 0 (0 to 0) |
| **Mozambique** | MOZ (AFRO) | 2,369 (1,959 to 2,652) | 8,525 (7,053 to 9,544) | 0 (0 to 0) | 0 (0 to 0) | 6,227 (5,103 to 6,995) | 1,636 (1,332 to 1,842) |
| **Mauritania** | MRT (AFRO) | 656 (531 to 761) | 2,361 (1,912 to 2,741) | 0 (0 to 0) | 0 (0 to 0) | 1,721 (1,380 to 2,007) | 453 (360 to 531) |
| **Malawi** | MWI (AFRO) | 260 (211 to 337) | 936 (761 to 1,212) | 0 (0 to 0) | 0 (0 to 0) | 629 (503 to 831) | 156 (123 to 210) |
| **Namibia** | NAM (AFRO) | 0 (0 to 0) | 13 (9 to 16) | -1 (-1 to -1) | -5 (-6 to -4) | 9 (7 to 11) | 2 (2 to 3) |
| **Niger** | NER (AFRO) | 7,189 (5,119 to 9,185) | 25,915 (18,481 to 33,079) | 0 (0 to 0) | 0 (0 to 0) | 19,009 (13,322 to 24,501) | 5,015 (3,440 to 6,509) |
| **Nigeria** | NGA (AFRO) | 31,640 (16,906 to 51,568) | 115,712 (61,838 to 188,267) | 0 (0 to 0) | 0 (0 to 0) | 83,630 (44,387 to 138,121) | 21,709 (11,461 to 36,318) |
| **Nicaragua** | NIC (PAHO) | 5 (4 to 6) | 17 (14 to 21) | 0 (0 to 0) | 0 (0 to 0) | 11 (9 to 13) | 3 (2 to 3) |
| **Nepal** | NPL (SEARO) | 207 (141 to 264) | 743 (507 to 950) | 0 (0 to 0) | 0 (0 to 0) | 507 (330 to 668) | 126 (79 to 170) |
| **Pakistan** | PAK (EMRO) | 10,508 (5,517 to 14,194) | 37,839 (19,872 to 51,100) | 0 (0 to 0) | 0 (0 to 0) | 27,115 (13,808 to 37,097) | 7,081 (3,507 to 9,807) |
| **Peru** | PER (PAHO) | 0 (0 to 0) | 41 (29 to 53) | -6 (-7 to -4) | -24 (-29 to -18) | 27 (19 to 36) | 7 (5 to 9) |
| **Philippines** | PHL (WPRO) | 0 (0 to 0) | 2,582 (2,154 to 3,063) | -47 (-54 to -40) | -187 (-216 to -160) | 1,700 (1,407 to 2,028) | 415 (343 to 495) |
| **Papua New Guinea** | PNG (WPRO) | 0 (0 to 0) | 2,148 (1,467 to 2,717) | -9 (-10 to -7) | -35 (-41 to -26) | 1,519 (1,008 to 1,956) | 401 (261 to 523) |
| **Korea, North** | PRK (SEARO) | 0 (0 to 0) | 0 (0 to 0) | -90 (-123 to -60) | -362 (-493 to -240) | 0 (0 to 0) | 0 (0 to 0) |
| **Paraguay** | PRY (PAHO) | 64 (40 to 79) | 230 (145 to 285) | 0 (0 to 0) | 0 (0 to 0) | 161 (98 to 202) | 41 (24 to 52) |
| **Rwanda** | RWA (AFRO) | 231 (177 to 263) | 830 (637 to 946) | 0 (0 to 0) | 0 (0 to 0) | 594 (444 to 683) | 153 (112 to 177) |
| **Sudan** | SDN (EMRO) | 1,557 (1,206 to 1,789) | 5,604 (4,342 to 6,440) | 0 (0 to 0) | 0 (0 to 0) | 4,086 (3,139 to 4,716) | 1,069 (814 to 1,237) |
| **Senegal** | SEN (AFRO) | 0 (0 to 0) | 424 (291 to 545) | -39 (-47 to -29) | -155 (-187 to -117) | 305 (205 to 399) | 79 (52 to 104) |
| **Solomon Islands** | SLB (WPRO) | 0 (0 to 0) | 14 (11 to 19) | -1 (-1 to -1) | -3 (-4 to -2) | 9 (7 to 12) | 2 (2 to 3) |
| **Sierra Leone** | SLE (AFRO) | 1,044 (712 to 1,275) | 3,769 (2,571 to 4,605) | 0 (0 to 0) | 0 (0 to 0) | 2,610 (1,761 to 3,201) | 653 (436 to 804) |
| **El Salvador** | SLV (PAHO) | 0 (0 to 0) | 17 (11 to 21) | -1 (-1 to -1) | -4 (-5 to -3) | 12 (7 to 15) | 3 (2 to 4) |
| **Somalia** | SOM (EMRO) | 2,202 (1,560 to 2,775) | 8,058 (5,729 to 10,114) | 0 (0 to 0) | 0 (0 to 0) | 5,938 (4,176 to 7,498) | 1,578 (1,098 to 2,002) |
| **Serbia** | SRB (EURO) | 0 (0 to 0) | 0 (0 to 0) | -3 (-4 to -2) | -12 (-17 to -7) | 0 (0 to 0) | 0 (0 to 0) |
| **South Sudan** | SSD (AFRO) | 1,222 (941 to 1,513) | 4,606 (3,518 to 5,718) | 0 (0 to 0) | 0 (0 to 0) | 3,339 (2,541 to 4,146) | 855 (653 to 1,061) |
| **Sao Tome and Principe** | STP (AFRO) | 0 (0 to 0) | 0 (0 to 0) | -1 (-1 to 0) | -2 (-3 to -2) | 0 (0 to 0) | 0 (0 to 0) |
| **Eswatini** | SWZ (AFRO) | 12 (7 to 18) | 44 (26 to 66) | 0 (0 to 0) | 0 (0 to 0) | 30 (17 to 46) | 7 (4 to 12) |
| **Syria** | SYR (EMRO) | 213 (160 to 281) | 770 (576 to 1,014) | 0 (0 to 0) | 0 (0 to 0) | 480 (355 to 641) | 114 (84 to 155) |
| **Chad** | TCD (AFRO) | 4,840 (3,516 to 6,251) | 17,591 (12,812 to 22,686) | 0 (0 to 0) | 0 (0 to 0) | 12,913 (9,297 to 16,728) | 3,454 (2,459 to 4,489) |
| **Togo** | TGO (AFRO) | 1,012 (757 to 1,346) | 3,646 (2,729 to 4,843) | 0 (0 to 0) | 0 (0 to 0) | 2,649 (1,946 to 3,555) | 694 (502 to 939) |
| **Thailand** | THA (SEARO) | 0 (0 to 0) | 0 (0 to 0) | -12 (-16 to -8) | -49 (-63 to -32) | 0 (0 to 0) | 0 (0 to 0) |
| **Tajikistan** | TJK (EURO) | 0 (0 to 0) | 0 (0 to 0) | -20 (-30 to -8) | -80 (-120 to -32) | 0 (0 to 0) | 0 (0 to 0) |
| **Turkmenistan** | TKM (EURO) | 0 (0 to 0) | 0 (0 to 0) | -7 (-9 to -5) | -29 (-36 to -21) | 0 (0 to 0) | 0 (0 to 0) |
| **Timor-Leste** | TLS (SEARO) | 0 (0 to 0) | 40 (31 to 49) | -1 (-2 to -1) | -6 (-7 to -4) | 29 (22 to 36) | 8 (6 to 9) |
| **Tonga** | TON (WPRO) | 0 (0 to 0) | 0 (0 to 0) | -1 (-1 to 0) | -2 (-3 to -2) | 0 (0 to 0) | 0 (0 to 0) |
| **Tunisia** | TUN (EMRO) | 0 (0 to 0) | 18 (15 to 20) | -2 (-2 to -1) | -6 (-7 to -5) | 11 (9 to 13) | 3 (2 to 3) |
| **Tuvalu** | TUV (WPRO) | 0 (0 to 0) | 0 (0 to 0) | 0 (0 to 0) | 0 (0 to 0) | 0 (0 to 0) | 0 (0 to 0) |
| **Tanzania** | TZA (AFRO) | 1,554 (932 to 2,092) | 5,594 (3,355 to 7,531) | 0 (0 to 0) | 0 (0 to 0) | 4,047 (2,311 to 5,539) | 1,057 (582 to 1,456) |
| **Uganda** | UGA (AFRO) | 1,221 (839 to 1,687) | 4,397 (3,022 to 6,076) | 0 (0 to 0) | 0 (0 to 0) | 2,929 (2,002 to 4,113) | 717 (489 to 1,020) |
| **Ukraine** | UKR (EURO) | 0 (0 to 0) | 285 (211 to 379) | -8 (-11 to -6) | -33 (-43 to -25) | 190 (139 to 255) | 47 (34 to 63) |
| **Uzbekistan** | UZB (EURO) | 0 (0 to 0) | 0 (0 to 0) | -102 (-182 to -50) | -407 (-730 to -200) | 0 (0 to 0) | 0 (0 to 0) |
| **Venezuela** | VEN (PAHO) | 0 (0 to 0) | 240 (131 to 304) | -4 (-5 to -3) | -17 (-21 to -12) | 163 (84 to 209) | 41 (20 to 52) |
| **Viet Nam** | VNM (WPRO) | 0 (0 to 0) | 1,742 (928 to 2,354) | -153 (-197 to -94) | -611 (-787 to -376) | 1,213 (627 to 1,656) | 306 (154 to 420) |
| **Vanuatu** | VUT (WPRO) | 0 (0 to 0) | 15 (7 to 24) | -2 (-2 to -1) | -7 (-10 to -3) | 11 (5 to 18) | 3 (1 to 5) |
| **Samoa** | WSM (WPRO) | 0 (0 to 0) | 8 (5 to 10) | 0 (0 to 0) | -1 (-1 to -1) | 5 (4 to 7) | 1 (1 to 2) |
| **Yemen** | YEM (EMRO) | 665 (474 to 780) | 2,394 (1,708 to 2,808) | 0 (0 to 0) | 0 (0 to 0) | 1,719 (1,184 to 2,035) | 450 (303 to 536) |
| **South Africa** | ZAF (AFRO) | 1,579 (911 to 2,037) | 5,684 (3,281 to 7,332) | 0 (0 to 0) | 0 (0 to 0) | 4,039 (2,225 to 5,251) | 1,047 (559 to 1,371) |
| **Zambia** | ZMB (AFRO) | 0 (0 to 0) | 0 (0 to 0) | -29 (-35 to -21) | -118 (-140 to -85) | 0 (0 to 0) | 0 (0 to 0) |
| **Zimbabwe** | ZWE (AFRO) | 224 (182 to 279) | 806 (657 to 1,004) | 0 (0 to 0) | 0 (0 to 0) | 534 (431 to 675) | 131 (105 to 167) |
| **Treatment level such that 80% of treatment-eligible individuals are in treatment in 2030** | | | | | | | |
| **Afghanistan** | AFG (EMRO) | 0 (0 to 0) | 596 (414 to 781) | -5 (-6 to -4) | -20 (-24 to -15) | 416 (277 to 556) | 106 (68 to 144) |
| **Angola** | AGO (AFRO) | 1,420 (838 to 1,828) | 5,120 (3,023 to 6,581) | 0 (0 to 0) | 0 (0 to 0) | 3,677 (2,090 to 4,797) | 962 (533 to 1,265) |
| **Albania** | ALB (EURO) | 0 (0 to 0) | 0 (0 to 0) | 0 (0 to 0) | -1 (-2 to -1) | 0 (0 to 0) | 0 (0 to 0) |
| **Armenia** | ARM (EURO) | 0 (0 to 0) | 0 (0 to 0) | -1 (-1 to 0) | -3 (-5 to -2) | 0 (0 to 0) | 0 (0 to 0) |
| **Azerbaijan** | AZE (EURO) | 0 (0 to 0) | 0 (0 to 0) | -6 (-8 to -4) | -24 (-33 to -15) | 0 (0 to 0) | 0 (0 to 0) |
| **Burundi** | BDI (AFRO) | 91 (65 to 105) | 328 (232 to 379) | 0 (0 to 0) | 0 (0 to 0) | 233 (160 to 271) | 60 (40 to 70) |
| **Benin** | BEN (AFRO) | 753 (559 to 1,052) | 2,720 (2,021 to 3,792) | 0 (0 to 0) | 0 (0 to 0) | 1,911 (1,392 to 2,746) | 487 (351 to 718) |
| **Burkina Faso** | BFA (AFRO) | 347 (228 to 502) | 1,249 (821 to 1,806) | 0 (0 to 0) | 0 (0 to 0) | 858 (549 to 1,270) | 215 (134 to 323) |
| **Bangladesh** | BGD (SEARO) | 781 (686 to 847) | 2,810 (2,471 to 3,048) | 0 (0 to 0) | 0 (0 to 0) | 1,935 (1,685 to 2,110) | 486 (419 to 532) |
| **Bosnia and Herzegovina** | BIH (EURO) | 3 (2 to 3) | 10 (7 to 12) | 0 (0 to 0) | 0 (0 to 0) | 7 (4 to 8) | 2 (1 to 2) |
| **Belarus** | BLR (EURO) | 0 (0 to 0) | 0 (0 to 0) | -3 (-4 to -2) | -11 (-17 to -6) | 0 (0 to 0) | 0 (0 to 0) |
| **Belize** | BLZ (PAHO) | 0 (0 to 0) | 0 (0 to 0) | 0 (0 to 0) | 0 (0 to 0) | 0 (0 to 0) | 0 (0 to 0) |
| **Bolivia** | BOL (PAHO) | 25 (13 to 37) | 90 (46 to 132) | 0 (0 to 0) | 0 (0 to 0) | 62 (29 to 92) | 16 (7 to 24) |
| **Bhutan** | BTN (SEARO) | 0 (0 to 0) | 1 (0 to 1) | 0 (0 to 0) | -1 (-1 to -1) | 0 (0 to 1) | 0 (0 to 0) |
| **Central African Republic** | CAF (AFRO) | 393 (267 to 501) | 1,423 (968 to 1,814) | 0 (0 to 0) | 0 (0 to 0) | 1,022 (680 to 1,325) | 266 (174 to 348) |
| **China** | CHN (WPRO) | 0 (0 to 0) | 0 (0 to 0) | -446 (-740 to -232) | -1,782 (-2,961 to -930) | 0 (0 to 0) | 0 (0 to 0) |
| **Ivory Coast** | CIV (AFRO) | 387 (209 to 488) | 1,959 (1,059 to 2,469) | -2 (-3 to -2) | -9 (-11 to -6) | 1,407 (732 to 1,794) | 366 (186 to 468) |
| **Cameroon** | CMR (AFRO) | 786 (473 to 1,039) | 2,829 (1,704 to 3,739) | 0 (0 to 0) | 0 (0 to 0) | 2,002 (1,161 to 2,687) | 518 (290 to 701) |
| **Democratic Republic of the Congo** | COD (AFRO) | 1,923 (1,349 to 2,458) | 6,925 (4,860 to 8,848) | 0 (0 to 0) | 0 (0 to 0) | 4,916 (3,355 to 6,350) | 1,276 (854 to 1,661) |
| **Congo** | COG (AFRO) | 222 (134 to 288) | 801 (482 to 1,038) | 0 (0 to 0) | 0 (0 to 0) | 566 (328 to 749) | 145 (82 to 195) |
| **Colombia** | COL (PAHO) | 0 (0 to 0) | 3 (2 to 3) | 0 (0 to 0) | -1 (-2 to -1) | 2 (1 to 2) | 0 (0 to 1) |
| **Comoros** | COM (AFRO) | 10 (7 to 14) | 37 (26 to 52) | 0 (0 to 0) | 0 (0 to 0) | 25 (17 to 37) | 6 (4 to 9) |
| **Cape Verde** | CPV (AFRO) | 0 (0 to 0) | 0 (0 to 0) | -1 (-1 to -1) | -4 (-5 to -2) | 0 (0 to 0) | 0 (0 to 0) |
| **Cuba** | CUB (PAHO) | 0 (0 to 0) | 0 (0 to 0) | 0 (0 to 0) | 0 (-1 to 0) | 0 (0 to 0) | 0 (0 to 0) |
| **Djibouti** | DJI (EMRO) | 0 (0 to 0) | 0 (0 to 0) | -1 (-1 to 0) | -2 (-2 to -2) | 0 (0 to 0) | 0 (0 to 0) |
| **Algeria** | DZA (AFRO) | 0 (0 to 0) | 0 (0 to 0) | -19 (-29 to -10) | -76 (-118 to -41) | 0 (0 to 0) | 0 (0 to 0) |
| **Ecuador** | ECU (PAHO) | 0 (0 to 0) | 50 (28 to 65) | -3 (-3 to -2) | -10 (-13 to -7) | 34 (19 to 45) | 8 (5 to 11) |
| **Egypt** | EGY (EMRO) | 0 (0 to 0) | 0 (0 to 0) | -4 (-5 to -4) | -18 (-21 to -15) | 0 (0 to 0) | 0 (0 to 0) |
| **Eritrea** | ERI (AFRO) | 25 (14 to 38) | 89 (49 to 135) | 0 (0 to 0) | 0 (0 to 0) | 61 (31 to 97) | 15 (7 to 25) |
| **Ethiopia** | ETH (AFRO) | 1,388 (885 to 1,940) | 5,003 (3,191 to 6,997) | 0 (0 to 0) | 0 (0 to 0) | 3,523 (2,209 to 4,973) | 899 (558 to 1,278) |
| **Fiji** | FJI (WPRO) | 0 (0 to 0) | 0 (0 to 0) | 0 (0 to 0) | -1 (-2 to -1) | 0 (0 to 0) | 0 (0 to 0) |
| **Micronesia** | FSM (WPRO) | 0 (0 to 0) | 1 (1 to 2) | 0 (0 to 0) | 0 (0 to 0) | 1 (0 to 1) | 0 (0 to 0) |
| **Georgia** | GEO (EURO) | 0 (0 to 0) | 0 (0 to 0) | -1 (-1 to -1) | -4 (-6 to -3) | 0 (0 to 0) | 0 (0 to 0) |
| **Ghana** | GHA (AFRO) | 948 (724 to 1,184) | 3,413 (2,605 to 4,262) | 0 (0 to 0) | 0 (0 to 0) | 2,431 (1,814 to 3,050) | 624 (459 to 786) |
| **Guinea** | GIN (AFRO) | 1,460 (966 to 1,924) | 5,282 (3,511 to 6,967) | 0 (0 to 0) | 0 (0 to 0) | 3,746 (2,395 to 5,015) | 972 (608 to 1,316) |
| **Gambia** | GMB (AFRO) | 42 (12 to 81) | 151 (44 to 291) | 0 (0 to 0) | 0 (0 to 0) | 106 (29 to 210) | 27 (7 to 54) |
| **Guinea-Bissau** | GNB (AFRO) | 67 (45 to 93) | 241 (163 to 335) | 0 (0 to 0) | 0 (0 to 0) | 170 (112 to 241) | 44 (28 to 63) |
| **Guatemala** | GTM (PAHO) | 0 (0 to 0) | 37 (29 to 51) | -1 (-1 to -1) | -3 (-3 to -2) | 25 (19 to 34) | 6 (5 to 8) |
| **Guyana** | GUY (PAHO) | 3 (2 to 4) | 12 (7 to 16) | 0 (0 to 0) | 0 (0 to 0) | 8 (5 to 11) | 2 (1 to 3) |
| **Honduras** | HND (PAHO) | 0 (0 to 0) | 38 (20 to 50) | -3 (-3 to -2) | -11 (-14 to -8) | 26 (13 to 34) | 6 (3 to 9) |
| **Haiti** | HTI (PAHO) | 152 (95 to 186) | 547 (343 to 671) | 0 (0 to 0) | 0 (0 to 0) | 387 (240 to 477) | 100 (62 to 123) |
| **Indonesia** | IDN (SEARO) | 0 (0 to 0) | 748 (643 to 908) | -157 (-187 to -138) | -627 (-746 to -553) | 505 (433 to 616) | 126 (108 to 154) |
| **India** | IND (SEARO) | 0 (0 to 0) | 17,715 (8,211 to 24,034) | -320 (-425 to -159) | -1,282 (-1,698 to -634) | 12,630 (5,761 to 17,211) | 3,244 (1,463 to 4,432) |
| **Iran** | IRN (EMRO) | 0 (0 to 0) | 0 (0 to 0) | -10 (-13 to -8) | -42 (-50 to -30) | 0 (0 to 0) | 0 (0 to 0) |
| **Iraq** | IRQ (EMRO) | 0 (0 to 0) | 416 (254 to 742) | -6 (-9 to -4) | -24 (-37 to -17) | 269 (159 to 498) | 65 (38 to 123) |
| **Jamaica** | JAM (PAHO) | 7 (6 to 9) | 26 (21 to 31) | 0 (0 to 0) | 0 (0 to 0) | 18 (14 to 21) | 4 (4 to 5) |
| **Jordan** | JOR (EMRO) | 8 (6 to 10) | 29 (23 to 35) | 0 (0 to 0) | 0 (0 to 0) | 20 (16 to 25) | 5 (4 to 6) |
| **Kenya** | KEN (AFRO) | 85 (60 to 116) | 307 (217 to 416) | 0 (0 to 0) | 0 (0 to 0) | 202 (139 to 279) | 49 (34 to 68) |
| **Kyrgyzstan** | KGZ (EURO) | 0 (0 to 0) | 0 (0 to 0) | -6 (-9 to -5) | -25 (-35 to -18) | 0 (0 to 0) | 0 (0 to 0) |
| **Cambodia** | KHM (WPRO) | 0 (0 to 0) | 11 (7 to 14) | -7 (-8 to -5) | -28 (-33 to -22) | 7 (5 to 9) | 2 (1 to 2) |
| **Kiribati** | KIR (WPRO) | 0 (0 to 0) | 0 (0 to 0) | 0 (0 to 0) | -1 (-1 to -1) | 0 (0 to 0) | 0 (0 to 0) |
| **Laos** | LAO (WPRO) | 0 (0 to 0) | 95 (66 to 116) | -2 (-2 to -2) | -8 (-9 to -6) | 66 (44 to 80) | 17 (11 to 21) |
| **Liberia** | LBR (AFRO) | 425 (267 to 552) | 1,534 (967 to 1,991) | 0 (0 to 0) | 0 (0 to 0) | 1,078 (648 to 1,428) | 276 (160 to 371) |
| **Sri Lanka** | LKA (SEARO) | 43 (31 to 58) | 154 (113 to 208) | 0 (0 to 0) | 0 (0 to 0) | 102 (73 to 142) | 25 (17 to 35) |
| **Lesotho** | LSO (AFRO) | 21 (11 to 30) | 77 (40 to 109) | 0 (0 to 0) | 0 (0 to 0) | 53 (26 to 77) | 13 (6 to 20) |
| **Morocco** | MAR (EMRO) | 0 (0 to 0) | 16 (10 to 21) | 0 (0 to 0) | -1 (-1 to -1) | 11 (6 to 15) | 3 (1 to 4) |
| **Moldova** | MDA (EURO) | 0 (0 to 0) | 0 (0 to 0) | -3 (-4 to -2) | -13 (-16 to -9) | 0 (0 to 0) | 0 (0 to 0) |
| **Madagascar** | MDG (AFRO) | 550 (467 to 618) | 1,980 (1,681 to 2,226) | 0 (0 to 0) | 0 (0 to 0) | 1,432 (1,202 to 1,618) | 373 (311 to 422) |
| **Marshall Islands** | MHL (WPRO) | 0 (0 to 0) | 0 (0 to 0) | 0 (0 to 0) | -1 (-1 to 0) | 0 (0 to 0) | 0 (0 to 0) |
| **North Macedonia** | MKD (EURO) | 0 (0 to 0) | 0 (0 to 0) | -1 (-1 to 0) | -2 (-3 to -2) | 0 (0 to 0) | 0 (0 to 0) |
| **Mali** | MLI (AFRO) | 398 (244 to 570) | 1,435 (881 to 2,054) | 0 (0 to 0) | 0 (0 to 0) | 985 (589 to 1,427) | 247 (146 to 362) |
| **Myanmar** | MMR (SEARO) | 226 (163 to 314) | 2,068 (1,490 to 2,870) | -7 (-9 to -5) | -28 (-35 to -22) | 1,390 (971 to 1,978) | 343 (235 to 497) |
| **Mongolia** | MNG (WPRO) | 0 (0 to 0) | 0 (0 to 0) | -2 (-4 to -1) | -8 (-15 to -4) | 0 (0 to 0) | 0 (0 to 0) |
| **Mozambique** | MOZ (AFRO) | 823 (690 to 942) | 2,963 (2,485 to 3,390) | 0 (0 to 0) | 0 (0 to 0) | 2,122 (1,764 to 2,442) | 548 (453 to 633) |
| **Mauritania** | MRT (AFRO) | 232 (195 to 266) | 837 (701 to 956) | 0 (0 to 0) | 0 (0 to 0) | 598 (498 to 688) | 155 (128 to 178) |
| **Malawi** | MWI (AFRO) | 72 (55 to 101) | 258 (199 to 362) | 0 (0 to 0) | 0 (0 to 0) | 168 (125 to 246) | 41 (30 to 61) |
| **Namibia** | NAM (AFRO) | 0 (0 to 0) | 5 (3 to 6) | -1 (-1 to 0) | -2 (-3 to -2) | 3 (2 to 4) | 1 (1 to 1) |
| **Niger** | NER (AFRO) | 2,865 (1,863 to 3,846) | 10,322 (6,721 to 13,846) | 0 (0 to 0) | 0 (0 to 0) | 7,421 (4,702 to 10,090) | 1,924 (1,193 to 2,641) |
| **Nigeria** | NGA (AFRO) | 15,098 (11,839 to 21,940) | 55,023 (43,166 to 79,804) | 0 (0 to 0) | 0 (0 to 0) | 39,744 (30,958 to 58,344) | 10,331 (8,000 to 15,303) |
| **Nicaragua** | NIC (PAHO) | 2 (1 to 2) | 7 (5 to 9) | 0 (0 to 0) | 0 (0 to 0) | 4 (3 to 6) | 1 (1 to 1) |
| **Nepal** | NPL (SEARO) | 62 (39 to 84) | 225 (142 to 301) | 0 (0 to 0) | 0 (0 to 0) | 150 (88 to 207) | 37 (20 to 52) |
| **Pakistan** | PAK (EMRO) | 3,148 (1,520 to 4,533) | 11,335 (5,473 to 16,324) | 0 (0 to 0) | 0 (0 to 0) | 7,961 (3,672 to 11,681) | 2,042 (913 to 3,034) |
| **Peru** | PER (PAHO) | 0 (0 to 0) | 15 (9 to 23) | -2 (-3 to -2) | -10 (-14 to -7) | 9 (6 to 15) | 2 (1 to 4) |
| **Philippines** | PHL (WPRO) | 0 (0 to 0) | 1,550 (1,266 to 1,783) | -30 (-33 to -27) | -119 (-133 to -106) | 1,017 (810 to 1,176) | 249 (195 to 289) |
| **Papua New Guinea** | PNG (WPRO) | 0 (0 to 0) | 701 (445 to 932) | -3 (-4 to -3) | -14 (-16 to -10) | 483 (294 to 657) | 124 (73 to 171) |
| **Korea, North** | PRK (SEARO) | 0 (0 to 0) | 0 (0 to 0) | -38 (-52 to -23) | -152 (-207 to -94) | 0 (0 to 0) | 0 (0 to 0) |
| **Paraguay** | PRY (PAHO) | 28 (16 to 36) | 102 (59 to 130) | 0 (0 to 0) | 0 (0 to 0) | 70 (38 to 91) | 18 (9 to 23) |
| **Rwanda** | RWA (AFRO) | 71 (52 to 83) | 254 (188 to 299) | 0 (0 to 0) | 0 (0 to 0) | 177 (127 to 211) | 45 (32 to 54) |
| **Sudan** | SDN (EMRO) | 547 (433 to 632) | 1,970 (1,558 to 2,275) | 0 (0 to 0) | 0 (0 to 0) | 1,409 (1,101 to 1,642) | 363 (281 to 424) |
| **Senegal** | SEN (AFRO) | 0 (0 to 0) | 162 (101 to 217) | -16 (-20 to -11) | -65 (-81 to -45) | 115 (70 to 157) | 30 (18 to 41) |
| **Solomon Islands** | SLB (WPRO) | 0 (0 to 0) | 9 (7 to 12) | -1 (-1 to 0) | -2 (-3 to -2) | 6 (4 to 8) | 1 (1 to 2) |
| **Sierra Leone** | SLE (AFRO) | 408 (319 to 501) | 1,470 (1,152 to 1,810) | 0 (0 to 0) | 0 (0 to 0) | 993 (767 to 1,253) | 246 (188 to 315) |
| **El Salvador** | SLV (PAHO) | 0 (0 to 0) | 5 (3 to 7) | 0 (0 to 0) | -2 (-2 to -1) | 4 (2 to 5) | 1 (0 to 1) |
| **Somalia** | SOM (EMRO) | 1,688 (1,046 to 2,249) | 6,132 (3,808 to 8,144) | 0 (0 to 0) | 0 (0 to 0) | 4,455 (2,723 to 5,957) | 1,169 (708 to 1,570) |
| **Serbia** | SRB (EURO) | 0 (0 to 0) | 0 (0 to 0) | -1 (-2 to -1) | -5 (-7 to -3) | 0 (0 to 0) | 0 (0 to 0) |
| **South Sudan** | SSD (AFRO) | 1,075 (782 to 1,392) | 3,986 (2,882 to 5,207) | 0 (0 to 0) | 0 (0 to 0) | 2,848 (2,031 to 3,799) | 731 (519 to 978) |
| **Sao Tome and Principe** | STP (AFRO) | 0 (0 to 0) | 0 (0 to 0) | 0 (0 to 0) | -1 (-1 to -1) | 0 (0 to 0) | 0 (0 to 0) |
| **Eswatini** | SWZ (AFRO) | 4 (2 to 7) | 16 (9 to 25) | 0 (0 to 0) | 0 (0 to 0) | 10 (5 to 17) | 3 (1 to 4) |
| **Syria** | SYR (EMRO) | 143 (109 to 193) | 516 (394 to 697) | 0 (0 to 0) | 0 (0 to 0) | 319 (238 to 444) | 76 (56 to 108) |
| **Chad** | TCD (AFRO) | 1,891 (1,246 to 2,465) | 6,845 (4,512 to 8,920) | 0 (0 to 0) | 0 (0 to 0) | 4,921 (3,181 to 6,484) | 1,285 (822 to 1,704) |
| **Togo** | TGO (AFRO) | 350 (245 to 453) | 1,260 (882 to 1,629) | 0 (0 to 0) | 0 (0 to 0) | 895 (611 to 1,171) | 230 (154 to 303) |
| **Thailand** | THA (SEARO) | 0 (0 to 0) | 0 (0 to 0) | -5 (-7 to -3) | -19 (-26 to -12) | 0 (0 to 0) | 0 (0 to 0) |
| **Tajikistan** | TJK (EURO) | 0 (0 to 0) | 0 (0 to 0) | -10 (-14 to -5) | -39 (-56 to -21) | 0 (0 to 0) | 0 (0 to 0) |
| **Turkmenistan** | TKM (EURO) | 0 (0 to 0) | 0 (0 to 0) | -5 (-6 to -4) | -19 (-24 to -16) | 0 (0 to 0) | 0 (0 to 0) |
| **Timor-Leste** | TLS (SEARO) | 0 (0 to 0) | 12 (9 to 15) | -1 (-1 to 0) | -2 (-2 to -2) | 8 (6 to 11) | 2 (2 to 3) |
| **Tonga** | TON (WPRO) | 0 (0 to 0) | 0 (0 to 0) | -1 (-1 to 0) | -2 (-2 to -2) | 0 (0 to 0) | 0 (0 to 0) |
| **Tunisia** | TUN (EMRO) | 0 (0 to 0) | 15 (14 to 16) | -1 (-1 to -1) | -5 (-5 to -5) | 10 (9 to 10) | 2 (2 to 2) |
| **Tuvalu** | TUV (WPRO) | 0 (0 to 0) | 0 (0 to 0) | 0 (0 to 0) | 0 (0 to 0) | 0 (0 to 0) | 0 (0 to 0) |
| **Tanzania** | TZA (AFRO) | 517 (252 to 854) | 1,860 (908 to 3,076) | 0 (0 to 0) | 0 (0 to 0) | 1,320 (606 to 2,250) | 340 (150 to 589) |
| **Uganda** | UGA (AFRO) | 511 (379 to 678) | 1,839 (1,365 to 2,442) | 0 (0 to 0) | 0 (0 to 0) | 1,212 (881 to 1,640) | 296 (213 to 406) |
| **Ukraine** | UKR (EURO) | 0 (0 to 0) | 107 (69 to 142) | -4 (-4 to -3) | -14 (-18 to -10) | 69 (43 to 93) | 17 (10 to 23) |
| **Uzbekistan** | UZB (EURO) | 0 (0 to 0) | 0 (0 to 0) | -71 (-96 to -50) | -283 (-385 to -199) | 0 (0 to 0) | 0 (0 to 0) |
| **Venezuela** | VEN (PAHO) | 0 (0 to 0) | 93 (47 to 115) | -2 (-2 to -1) | -8 (-9 to -5) | 62 (29 to 78) | 15 (7 to 19) |
| **Viet Nam** | VNM (WPRO) | 0 (0 to 0) | 658 (339 to 875) | -64 (-81 to -39) | -257 (-324 to -154) | 451 (223 to 608) | 112 (54 to 153) |
| **Vanuatu** | VUT (WPRO) | 0 (0 to 0) | 7 (4 to 10) | -1 (-1 to -1) | -3 (-5 to -2) | 5 (3 to 7) | 1 (1 to 2) |
| **Samoa** | WSM (WPRO) | 0 (0 to 0) | 4 (3 to 4) | 0 (0 to 0) | -1 (-1 to -1) | 2 (2 to 3) | 1 (0 to 1) |
| **Yemen** | YEM (EMRO) | 214 (136 to 264) | 770 (489 to 949) | 0 (0 to 0) | 0 (0 to 0) | 541 (331 to 678) | 139 (83 to 175) |
| **South Africa** | ZAF (AFRO) | 652 (335 to 864) | 2,347 (1,207 to 3,111) | 0 (0 to 0) | 0 (0 to 0) | 1,633 (795 to 2,196) | 416 (196 to 563) |
| **Zambia** | ZMB (AFRO) | 0 (0 to 0) | 0 (0 to 0) | -11 (-14 to -7) | -45 (-56 to -29) | 0 (0 to 0) | 0 (0 to 0) |
| **Zimbabwe** | ZWE (AFRO) | 79 (63 to 101) | 284 (228 to 365) | 0 (0 to 0) | 0 (0 to 0) | 184 (143 to 240) | 44 (34 to 59) |

Table S6. Median year of elimination of HBV (year that HBsAg prevalence in five year olds falls below 0.1%) in selected scenarios for each country modelled, with 95% credibility intervals in parentheses. Two target values are presented for scenario 2 i.e. TBD expansion to ≥25% and ≥90% by 2030. HBsAg: hepatitis B surface antigen; HBV: hepatitis B; TBD: timely birth dose; WHO: World Health Organization.

| **Country** | **ISO  (WHO region)** | **Scenario 1** | **Scenario 2 (≥25%)** | **Scenario 2 (≥90%)** | **Scenario 3a** | **Scenario 3d** | **Scenario 4a** | **Scenario 4c** |
| --- | --- | --- | --- | --- | --- | --- | --- | --- |
| **Default settings** | | | | | | | | |
| **Afghanistan** | AFG (EMRO) | 2055 (2045 to 2074) | 2055 (2045 to 2074) | 2034 (2033 to 2039) | 2055 (2045 to 2074) | 2056 (2045 to 2074) | 2034 (2034 to 2039) | 2041 (2038 to 2043) |
| **Angola** | AGO (AFRO) | after 2100 (2092 to after 2100) | after 2100 (2081 to after 2100) | 2060 (2052 to 2067) | after 2100 (2092 to after 2100) | after 2100 (2092 to after 2100) | 2061 (2053 to 2068) | 2066 (2055 to 2073) |
| **Albania** | ALB (EURO) | 2026 (2019 to 2028) | 2026 (2019 to 2028) | 2026 (2019 to 2028) | 2026 (2019 to 2028) | 2026 (2019 to 2028) | 2026 (2019 to 2028) | 2026 (2019 to 2028) |
| **Armenia** | ARM (EURO) | 2031 (2018 to 2033) | 2031 (2018 to 2033) | 2031 (2018 to 2033) | 2031 (2018 to 2033) | 2031 (2018 to 2033) | 2031 (2018 to 2033) | 2031 (2018 to 2033) |
| **Azerbaijan** | AZE (EURO) | 2034 (2027 to 2037) | 2034 (2027 to 2037) | 2034 (2027 to 2037) | 2034 (2027 to 2037) | 2034 (2028 to 2037) | 2034 (2027 to 2037) | 2034 (2027 to 2037) |
| **Burundi** | BDI (AFRO) | 2069 (2051 to 2097) | 2057 (2045 to 2070) | 2033 (2032 to 2034) | 2069 (2051 to 2097) | 2069 (2051 to 2097) | 2033 (2033 to 2034) | 2040 (2038 to 2041) |
| **Benin** | BEN (AFRO) | after 2100 (2097 to after 2100) | 2096 (2086 to after 2100) | 2059 (2056 to 2065) | after 2100 (2097 to after 2100) | after 2100 (2097 to after 2100) | 2060 (2057 to 2066) | 2064 (2060 to 2072) |
| **Burkina Faso** | BFA (AFRO) | 2057 (2048 to 2072) | 2051 (2046 to 2064) | 2036 (2035 to 2038) | 2057 (2048 to 2072) | 2057 (2048 to 2072) | 2036 (2035 to 2039) | 2042 (2041 to 2043) |
| **Bangladesh** | BGD (SEARO) | 2096 (2073 to after 2100) | 2073 (2061 to 2095) | 2034 (2034 to 2035) | 2096 (2073 to after 2100) | 2096 (2073 to after 2100) | 2035 (2034 to 2035) | 2043 (2042 to 2044) |
| **Bosnia and Herzegovina** | BIH (EURO) | 2047 (2041 to 2072) | 2042 (2038 to 2057) | 2032 (2031 to 2033) | 2047 (2041 to 2072) | 2047 (2041 to 2072) | 2033 (2032 to 2034) | 2038 (2037 to 2039) |
| **Belarus** | BLR (EURO) | 2037 (2030 to 2039) | 2037 (2030 to 2039) | 2037 (2030 to 2039) | 2037 (2030 to 2039) | 2037 (2030 to 2039) | 2037 (2030 to 2039) | 2037 (2030 to 2039) |
| **Belize** | BLZ (PAHO) | 2019 (2008 to 2021) | 2019 (2008 to 2021) | 2019 (2008 to 2021) | 2019 (2008 to 2021) | 2019 (2008 to 2021) | 2019 (2008 to 2021) | 2019 (2008 to 2021) |
| **Bolivia** | BOL (PAHO) | 2038 (2031 to 2060) | 2034 (2030 to 2042) | 2029 (2028 to 2030) | 2038 (2031 to 2060) | 2038 (2031 to 2060) | 2031 (2029 to 2031) | 2034 (2031 to 2036) |
| **Bhutan** | BTN (SEARO) | 2039 (2031 to 2046) | 2039 (2031 to 2046) | 2036 (2030 to 2044) | 2039 (2031 to 2046) | 2039 (2031 to 2046) | 2036 (2031 to 2044) | 2037 (2031 to 2044) |
| **Central African Republic** | CAF (AFRO) | after 2100 (after 2100 to after 2100) | after 2100 (after 2100 to after 2100) | 2076 (2068 to 2093) | after 2100 (after 2100 to after 2100) | after 2100 (after 2100 to after 2100) | 2077 (2069 to 2094) | 2082 (2074 to 2099) |
| **China** | CHN (WPRO) | 2026 (2021 to 2031) | 2026 (2021 to 2031) | 2026 (2021 to 2031) | 2026 (2021 to 2031) | 2026 (2021 to 2031) | 2026 (2021 to 2031) | 2026 (2021 to 2031) |
| **Ivory Coast** | CIV (AFRO) | after 2100 (2066 to after 2100) | 2098 (2062 to after 2100) | 2050 (2039 to 2056) | after 2100 (2066 to after 2100) | after 2100 (2066 to after 2100) | 2051 (2039 to 2057) | 2053 (2044 to 2062) |
| **Cameroon** | CMR (AFRO) | after 2100 (2079 to after 2100) | after 2100 (2070 to after 2100) | 2055 (2045 to 2061) | after 2100 (2079 to after 2100) | after 2100 (2079 to after 2100) | 2056 (2045 to 2062) | 2059 (2047 to 2067) |
| **Democratic Republic of the Congo** | COD (AFRO) | after 2100 (2082 to after 2100) | 2096 (2071 to after 2100) | 2052 (2044 to 2059) | after 2100 (2082 to after 2100) | after 2100 (2082 to after 2100) | 2053 (2044 to 2060) | 2056 (2046 to 2065) |
| **Congo** | COG (AFRO) | after 2100 (2079 to after 2100) | after 2100 (2072 to after 2100) | 2061 (2052 to 2069) | after 2100 (2079 to after 2100) | after 2100 (2079 to after 2100) | 2062 (2052 to 2070) | 2066 (2054 to 2075) |
| **Colombia** | COL (PAHO) | 2000 (2000 to 2000) | 2000 (2000 to 2000) | 2000 (2000 to 2000) | 2000 (2000 to 2000) | 2000 (2000 to 2000) | 2000 (2000 to 2000) | 2000 (2000 to 2000) |
| **Comoros** | COM (AFRO) | 2076 (2063 to after 2100) | 2068 (2058 to 2087) | 2046 (2039 to 2053) | 2076 (2063 to after 2100) | 2076 (2063 to after 2100) | 2046 (2039 to 2054) | 2046 (2044 to 2057) |
| **Cape Verde** | CPV (AFRO) | 2044 (2039 to 2051) | 2044 (2039 to 2051) | 2044 (2039 to 2051) | 2044 (2039 to 2051) | 2044 (2039 to 2052) | 2044 (2039 to 2051) | 2044 (2039 to 2051) |
| **Cuba** | CUB (PAHO) | before 1980 (before 1980 to before 1980) | before 1980 (before 1980 to before 1980) | before 1980 (before 1980 to before 1980) | before 1980 (before 1980 to before 1980) | before 1980 (before 1980 to before 1980) | before 1980 (before 1980 to before 1980) | before 1980 (before 1980 to before 1980) |
| **Djibouti** | DJI (EMRO) | 2039 (2028 to 2045) | 2039 (2028 to 2045) | 2039 (2028 to 2045) | 2039 (2028 to 2045) | 2039 (2028 to 2045) | 2039 (2028 to 2045) | 2039 (2028 to 2045) |
| **Algeria** | DZA (AFRO) | 2024 (2011 to 2034) | 2024 (2011 to 2034) | 2024 (2011 to 2034) | 2024 (2011 to 2034) | 2024 (2011 to 2034) | 2024 (2011 to 2034) | 2024 (2011 to 2034) |
| **Ecuador** | ECU (PAHO) | 2034 (2028 to 2038) | 2034 (2028 to 2038) | 2029 (2026 to 2031) | 2034 (2028 to 2038) | 2034 (2028 to 2038) | 2030 (2028 to 2032) | 2032 (2028 to 2035) |
| **Egypt** | EGY (EMRO) | 2021 (2021 to 2022) | 2021 (2021 to 2022) | 2021 (2021 to 2022) | 2021 (2021 to 2022) | 2021 (2021 to 2022) | 2021 (2021 to 2022) | 2021 (2021 to 2022) |
| **Eritrea** | ERI (AFRO) | 2062 (2043 to 2095) | 2056 (2041 to 2074) | 2034 (2033 to 2035) | 2062 (2043 to 2095) | 2062 (2043 to 2095) | 2034 (2034 to 2035) | 2041 (2038 to 2043) |
| **Ethiopia** | ETH (AFRO) | 2063 (2052 to 2073) | 2056 (2050 to 2065) | 2038 (2035 to 2041) | 2063 (2052 to 2073) | 2063 (2052 to 2073) | 2038 (2036 to 2041) | 2043 (2042 to 2045) |
| **Fiji** | FJI (WPRO) | 2021 (2006 to 2027) | 2021 (2006 to 2027) | 2021 (2006 to 2027) | 2021 (2006 to 2027) | 2021 (2006 to 2027) | 2021 (2006 to 2027) | 2021 (2006 to 2027) |
| **Micronesia** | FSM (WPRO) | 2062 (2044 to 2071) | 2062 (2044 to 2071) | 2042 (2037 to 2057) | 2062 (2044 to 2071) | 2063 (2044 to 2071) | 2042 (2037 to 2058) | 2044 (2040 to 2059) |
| **Georgia** | GEO (EURO) | 2033 (2012 to 2037) | 2033 (2012 to 2037) | 2033 (2012 to 2037) | 2033 (2012 to 2037) | 2033 (2012 to 2037) | 2033 (2012 to 2037) | 2033 (2012 to 2037) |
| **Ghana** | GHA (AFRO) | after 2100 (2089 to after 2100) | after 2100 (2076 to after 2100) | 2055 (2044 to 2059) | after 2100 (2089 to after 2100) | after 2100 (2089 to after 2100) | 2056 (2045 to 2060) | 2059 (2045 to 2064) |
| **Guinea** | GIN (AFRO) | after 2100 (after 2100 to after 2100) | after 2100 (after 2100 to after 2100) | 2076 (2067 to 2089) | after 2100 (after 2100 to after 2100) | after 2100 (after 2100 to after 2100) | 2076 (2068 to 2090) | 2081 (2072 to 2094) |
| **Gambia** | GMB (AFRO) | 2064 (2040 to after 2100) | 2058 (2037 to 2090) | 2034 (2032 to 2035) | 2064 (2040 to after 2100) | 2064 (2040 to after 2100) | 2034 (2033 to 2035) | 2041 (2036 to 2044) |
| **Guinea-Bissau** | GNB (AFRO) | after 2100 (2077 to after 2100) | after 2100 (2070 to after 2100) | 2056 (2048 to 2064) | after 2100 (2077 to after 2100) | after 2100 (2077 to after 2100) | 2057 (2048 to 2065) | 2061 (2049 to 2070) |
| **Guatemala** | GTM (PAHO) | 2012 (2011 to 2012) | 2012 (2011 to 2012) | 2012 (2011 to 2012) | 2012 (2011 to 2012) | 2012 (2011 to 2012) | 2012 (2011 to 2012) | 2012 (2011 to 2012) |
| **Guyana** | GUY (PAHO) | after 2100 (2064 to after 2100) | 2081 (2057 to after 2100) | 2040 (2035 to 2052) | after 2100 (2064 to after 2100) | after 2100 (2064 to after 2100) | 2040 (2035 to 2053) | 2045 (2042 to 2057) |
| **Honduras** | HND (PAHO) | 2042 (2036 to 2048) | 2042 (2036 to 2048) | 2035 (2032 to 2039) | 2042 (2036 to 2048) | 2042 (2036 to 2048) | 2035 (2033 to 2039) | 2038 (2035 to 2042) |
| **Haiti** | HTI (PAHO) | after 2100 (2095 to after 2100) | after 2100 (2081 to after 2100) | 2059 (2049 to 2065) | after 2100 (2095 to after 2100) | after 2100 (2095 to after 2100) | 2060 (2049 to 2066) | 2064 (2051 to 2072) |
| **Indonesia** | IDN (SEARO) | 2053 (2051 to 2057) | 2053 (2051 to 2057) | 2051 (2048 to 2055) | 2054 (2051 to 2057) | 2054 (2051 to 2057) | 2051 (2048 to 2055) | 2051 (2048 to 2055) |
| **India** | IND (SEARO) | 2064 (2045 to 2078) | 2064 (2045 to 2078) | 2044 (2034 to 2049) | 2064 (2045 to 2078) | 2065 (2045 to 2078) | 2044 (2035 to 2050) | 2045 (2040 to 2050) |
| **Iran** | IRN (EMRO) | 2005 (2005 to 2005) | 2005 (2005 to 2005) | 2005 (2005 to 2005) | 2005 (2005 to 2005) | 2005 (2005 to 2005) | 2005 (2005 to 2005) | 2005 (2005 to 2005) |
| **Iraq** | IRQ (EMRO) | 2048 (2040 to 2062) | 2048 (2040 to 2062) | 2035 (2033 to 2039) | 2048 (2040 to 2062) | 2048 (2040 to 2062) | 2035 (2033 to 2039) | 2040 (2037 to 2044) |
| **Jamaica** | JAM (PAHO) | 2097 (2070 to after 2100) | 2075 (2060 to after 2100) | 2035 (2034 to 2040) | 2097 (2070 to after 2100) | 2097 (2070 to after 2100) | 2035 (2034 to 2040) | 2043 (2042 to 2045) |
| **Jordan** | JOR (EMRO) | 2000 (1993 to 2000) | 2000 (1993 to 2000) | 2000 (1993 to 2000) | 2000 (1993 to 2000) | 2000 (1993 to 2000) | 2000 (1993 to 2000) | 2000 (1993 to 2000) |
| **Kenya** | KEN (AFRO) | 2029 (2027 to 2031) | 2028 (2027 to 2030) | 2027 (2026 to 2028) | 2029 (2027 to 2031) | 2029 (2027 to 2031) | 2028 (2027 to 2029) | 2029 (2027 to 2031) |
| **Kyrgyzstan** | KGZ (EURO) | 2038 (2034 to 2041) | 2038 (2034 to 2041) | 2038 (2034 to 2041) | 2038 (2034 to 2041) | 2038 (2034 to 2041) | 2038 (2034 to 2041) | 2038 (2034 to 2041) |
| **Cambodia** | KHM (WPRO) | 2035 (2032 to 2038) | 2035 (2032 to 2038) | 2035 (2031 to 2037) | 2035 (2032 to 2038) | 2035 (2032 to 2038) | 2035 (2032 to 2037) | 2035 (2032 to 2038) |
| **Kiribati** | KIR (WPRO) | 2048 (2037 to 2057) | 2048 (2037 to 2057) | 2048 (2037 to 2057) | 2048 (2037 to 2057) | 2049 (2037 to 2057) | 2048 (2037 to 2057) | 2048 (2037 to 2057) |
| **Laos** | LAO (WPRO) | 2058 (2050 to 2069) | 2058 (2050 to 2069) | 2039 (2034 to 2046) | 2058 (2050 to 2069) | 2058 (2050 to 2070) | 2039 (2035 to 2046) | 2043 (2041 to 2047) |
| **Liberia** | LBR (AFRO) | after 2100 (after 2100 to after 2100) | after 2100 (2095 to after 2100) | 2068 (2061 to 2080) | after 2100 (after 2100 to after 2100) | after 2100 (after 2100 to after 2100) | 2069 (2062 to 2081) | 2074 (2065 to 2085) |
| **Sri Lanka** | LKA (SEARO) | 2056 (2043 to 2079) | 2047 (2041 to 2065) | 2034 (2033 to 2036) | 2056 (2043 to 2079) | 2056 (2043 to 2079) | 2034 (2034 to 2036) | 2040 (2038 to 2042) |
| **Lesotho** | LSO (AFRO) | 2094 (2061 to after 2100) | 2078 (2056 to after 2100) | 2046 (2038 to 2055) | 2094 (2061 to after 2100) | 2094 (2061 to after 2100) | 2047 (2038 to 2056) | 2048 (2043 to 2061) |
| **Morocco** | MAR (EMRO) | before 1980 (before 1980 to 1986) | before 1980 (before 1980 to 1986) | before 1980 (before 1980 to 1986) | before 1980 (before 1980 to 1986) | before 1980 (before 1980 to 1986) | before 1980 (before 1980 to 1986) | before 1980 (before 1980 to 1986) |
| **Moldova** | MDA (EURO) | 2043 (2040 to 2054) | 2043 (2040 to 2054) | 2043 (2040 to 2054) | 2043 (2040 to 2055) | 2043 (2040 to 2056) | 2043 (2040 to 2054) | 2043 (2040 to 2054) |
| **Madagascar** | MDG (AFRO) | after 2100 (2098 to after 2100) | 2094 (2079 to after 2100) | 2042 (2036 to 2048) | after 2100 (2098 to after 2100) | after 2100 (2098 to after 2100) | 2042 (2036 to 2049) | 2045 (2044 to 2051) |
| **Marshall Islands** | MHL (WPRO) | 2044 (2040 to 2058) | 2044 (2040 to 2058) | 2044 (2040 to 2058) | 2044 (2040 to 2058) | 2044 (2040 to 2059) | 2044 (2040 to 2058) | 2044 (2040 to 2058) |
| **North Macedonia** | MKD (EURO) | 2040 (2017 to 2044) | 2040 (2017 to 2044) | 2040 (2017 to 2044) | 2040 (2017 to 2044) | 2040 (2017 to 2044) | 2040 (2017 to 2044) | 2040 (2017 to 2044) |
| **Mali** | MLI (AFRO) | 2058 (2051 to 2067) | 2054 (2048 to 2060) | 2036 (2035 to 2037) | 2058 (2051 to 2067) | 2058 (2051 to 2067) | 2036 (2035 to 2038) | 2042 (2041 to 2043) |
| **Myanmar** | MMR (SEARO) | 2078 (2065 to after 2100) | 2075 (2063 to after 2100) | 2052 (2044 to 2061) | 2078 (2065 to after 2100) | 2078 (2065 to after 2100) | 2053 (2044 to 2062) | 2054 (2045 to 2066) |
| **Mongolia** | MNG (WPRO) | 2027 (2021 to 2029) | 2027 (2021 to 2029) | 2027 (2021 to 2029) | 2027 (2021 to 2029) | 2027 (2021 to 2029) | 2027 (2021 to 2029) | 2027 (2021 to 2029) |
| **Mozambique** | MOZ (AFRO) | after 2100 (after 2100 to after 2100) | after 2100 (2083 to after 2100) | 2052 (2046 to 2058) | after 2100 (after 2100 to after 2100) | after 2100 (after 2100 to after 2100) | 2053 (2047 to 2059) | 2057 (2048 to 2064) |
| **Mauritania** | MRT (AFRO) | after 2100 (after 2100 to after 2100) | after 2100 (after 2100 to after 2100) | 2064 (2059 to 2069) | after 2100 (after 2100 to after 2100) | after 2100 (after 2100 to after 2100) | 2065 (2060 to 2070) | 2070 (2064 to 2076) |
| **Malawi** | MWI (AFRO) | 2040 (2037 to 2047) | 2037 (2035 to 2042) | 2032 (2031 to 2033) | 2040 (2037 to 2047) | 2040 (2037 to 2047) | 2033 (2032 to 2033) | 2036 (2034 to 2038) |
| **Namibia** | NAM (AFRO) | 2040 (2036 to 2043) | 2040 (2036 to 2043) | 2035 (2031 to 2041) | 2040 (2036 to 2043) | 2040 (2036 to 2043) | 2035 (2032 to 2041) | 2038 (2034 to 2041) |
| **Niger** | NER (AFRO) | after 2100 (2100 to after 2100) | after 2100 (2089 to after 2100) | 2066 (2058 to 2076) | after 2100 (2100 to after 2100) | after 2100 (2100 to after 2100) | 2067 (2059 to 2078) | 2072 (2062 to 2082) |
| **Nigeria** | NGA (AFRO) | after 2100 (after 2100 to after 2100) | after 2100 (after 2100 to after 2100) | 2066 (2063 to 2072) | after 2100 (after 2100 to after 2100) | after 2100 (after 2100 to after 2100) | 2067 (2064 to 2073) | 2072 (2068 to 2079) |
| **Nicaragua** | NIC (PAHO) | 2004 (2004 to 2004) | 2004 (2004 to 2004) | 2004 (2004 to 2004) | 2004 (2004 to 2004) | 2004 (2004 to 2004) | 2004 (2004 to 2004) | 2004 (2004 to 2004) |
| **Nepal** | NPL (SEARO) | 2051 (2036 to 2079) | 2042 (2035 to 2057) | 2032 (2031 to 2033) | 2051 (2036 to 2079) | 2051 (2036 to 2079) | 2033 (2032 to 2033) | 2037 (2034 to 2039) |
| **Pakistan** | PAK (EMRO) | after 2100 (2064 to after 2100) | 2095 (2057 to after 2100) | 2049 (2035 to 2057) | after 2100 (2064 to after 2100) | after 2100 (2064 to after 2100) | 2050 (2035 to 2059) | 2051 (2042 to 2064) |
| **Peru** | PER (PAHO) | 2008 (2008 to 2009) | 2008 (2008 to 2009) | 2008 (2008 to 2009) | 2008 (2008 to 2009) | 2008 (2008 to 2009) | 2008 (2008 to 2009) | 2008 (2008 to 2009) |
| **Philippines** | PHL (WPRO) | 2058 (2053 to 2064) | 2058 (2053 to 2064) | 2044 (2040 to 2048) | 2058 (2053 to 2064) | 2058 (2053 to 2064) | 2044 (2040 to 2048) | 2045 (2043 to 2049) |
| **Papua New Guinea** | PNG (WPRO) | after 2100 (after 2100 to after 2100) | after 2100 (after 2100 to after 2100) | 2066 (2060 to 2080) | after 2100 (after 2100 to after 2100) | after 2100 (after 2100 to after 2100) | 2067 (2061 to 2081) | 2071 (2064 to 2084) |
| **Korea, North** | PRK (SEARO) | 2042 (2039 to 2043) | 2042 (2039 to 2043) | 2042 (2039 to 2043) | 2042 (2039 to 2043) | 2042 (2039 to 2043) | 2042 (2039 to 2043) | 2042 (2039 to 2043) |
| **Paraguay** | PRY (PAHO) | 2090 (2058 to after 2100) | 2071 (2051 to after 2100) | 2035 (2034 to 2044) | 2090 (2058 to after 2100) | 2090 (2058 to after 2100) | 2035 (2034 to 2045) | 2043 (2041 to 2046) |
| **Rwanda** | RWA (AFRO) | 2062 (2047 to 2083) | 2052 (2041 to 2063) | 2032 (2032 to 2033) | 2062 (2047 to 2083) | 2062 (2047 to 2083) | 2033 (2033 to 2034) | 2039 (2037 to 2041) |
| **Sudan** | SDN (EMRO) | after 2100 (2080 to after 2100) | 2091 (2069 to after 2100) | 2044 (2037 to 2055) | after 2100 (2080 to after 2100) | after 2100 (2080 to after 2100) | 2044 (2037 to 2056) | 2045 (2044 to 2059) |
| **Senegal** | SEN (AFRO) | 2044 (2039 to 2049) | 2044 (2039 to 2049) | 2037 (2034 to 2042) | 2044 (2039 to 2049) | 2044 (2039 to 2050) | 2037 (2034 to 2042) | 2040 (2037 to 2043) |
| **Solomon Islands** | SLB (WPRO) | 2052 (2046 to 2059) | 2052 (2046 to 2059) | 2044 (2038 to 2051) | 2052 (2046 to 2059) | 2052 (2046 to 2059) | 2044 (2038 to 2051) | 2044 (2041 to 2051) |
| **Sierra Leone** | SLE (AFRO) | 2095 (2082 to after 2100) | 2085 (2075 to 2100) | 2059 (2055 to 2065) | 2095 (2082 to after 2100) | 2095 (2082 to after 2100) | 2060 (2056 to 2065) | 2063 (2058 to 2069) |
| **El Salvador** | SLV (PAHO) | 2020 (2020 to 2020) | 2020 (2020 to 2020) | 2020 (2020 to 2020) | 2020 (2020 to 2020) | 2020 (2020 to 2020) | 2020 (2020 to 2020) | 2020 (2020 to 2020) |
| **Somalia** | SOM (EMRO) | after 2100 (after 2100 to after 2100) | after 2100 (after 2100 to after 2100) | 2081 (2069 to 2095) | after 2100 (after 2100 to after 2100) | after 2100 (after 2100 to after 2100) | 2082 (2069 to 2096) | 2086 (2074 to after 2100) |
| **Serbia** | SRB (EURO) | 2018 (2010 to 2036) | 2018 (2010 to 2036) | 2018 (2010 to 2036) | 2018 (2010 to 2036) | 2018 (2010 to 2036) | 2018 (2010 to 2036) | 2018 (2010 to 2036) |
| **South Sudan** | SSD (AFRO) | after 2100 (after 2100 to after 2100) | after 2100 (after 2100 to after 2100) | 2087 (2073 to after 2100) | after 2100 (after 2100 to after 2100) | after 2100 (after 2100 to after 2100) | 2088 (2073 to after 2100) | 2091 (2077 to after 2100) |
| **Sao Tome and Principe** | STP (AFRO) | 2040 (2031 to 2046) | 2040 (2031 to 2046) | 2040 (2031 to 2046) | 2040 (2031 to 2046) | 2040 (2031 to 2046) | 2040 (2031 to 2046) | 2040 (2031 to 2046) |
| **Eswatini** | SWZ (AFRO) | 2052 (2040 to 2066) | 2047 (2037 to 2059) | 2033 (2032 to 2034) | 2052 (2040 to 2066) | 2052 (2040 to 2066) | 2034 (2033 to 2035) | 2039 (2036 to 2042) |
| **Syria** | SYR (EMRO) | 2081 (2067 to 2100) | 2070 (2063 to 2087) | 2050 (2038 to 2058) | 2081 (2067 to 2100) | 2081 (2067 to 2100) | 2051 (2039 to 2059) | 2052 (2044 to 2061) |
| **Chad** | TCD (AFRO) | after 2100 (after 2100 to after 2100) | after 2100 (after 2100 to after 2100) | 2078 (2070 to 2094) | after 2100 (after 2100 to after 2100) | after 2100 (after 2100 to after 2100) | 2079 (2071 to 2095) | 2084 (2075 to 2100) |
| **Togo** | TGO (AFRO) | after 2100 (2091 to after 2100) | after 2100 (2080 to after 2100) | 2060 (2053 to 2066) | after 2100 (2091 to after 2100) | after 2100 (2091 to after 2100) | 2061 (2054 to 2067) | 2066 (2057 to 2072) |
| **Thailand** | THA (SEARO) | 2022 (2022 to 2022) | 2022 (2022 to 2022) | 2022 (2022 to 2022) | 2022 (2022 to 2022) | 2022 (2022 to 2022) | 2022 (2022 to 2022) | 2022 (2022 to 2022) |
| **Tajikistan** | TJK (EURO) | 2033 (2029 to 2035) | 2033 (2029 to 2035) | 2033 (2029 to 2035) | 2033 (2029 to 2035) | 2033 (2029 to 2035) | 2033 (2029 to 2035) | 2033 (2029 to 2035) |
| **Turkmenistan** | TKM (EURO) | 2037 (2033 to 2040) | 2037 (2033 to 2040) | 2037 (2033 to 2040) | 2037 (2033 to 2040) | 2037 (2033 to 2040) | 2037 (2033 to 2040) | 2037 (2033 to 2040) |
| **Timor-Leste** | TLS (SEARO) | 2051 (2045 to 2056) | 2051 (2045 to 2056) | 2042 (2035 to 2048) | 2051 (2045 to 2056) | 2051 (2045 to 2057) | 2042 (2035 to 2048) | 2044 (2040 to 2048) |
| **Tonga** | TON (WPRO) | 2052 (2043 to 2064) | 2052 (2043 to 2064) | 2052 (2043 to 2064) | 2053 (2043 to 2064) | 2054 (2043 to 2064) | 2052 (2043 to 2064) | 2052 (2043 to 2064) |
| **Tunisia** | TUN (EMRO) | 2034 (2013 to 2035) | 2034 (2013 to 2035) | 2031 (2013 to 2032) | 2034 (2013 to 2035) | 2034 (2013 to 2035) | 2032 (2013 to 2032) | 2033 (2013 to 2034) |
| **Tuvalu** | TUV (WPRO) | 2040 (2035 to 2046) | 2040 (2035 to 2046) | 2040 (2035 to 2046) | 2040 (2035 to 2046) | 2040 (2035 to 2046) | 2040 (2035 to 2046) | 2040 (2035 to 2046) |
| **Tanzania** | TZA (AFRO) | 2071 (2045 to after 2100) | 2058 (2040 to 2076) | 2034 (2032 to 2034) | 2071 (2045 to after 2100) | 2071 (2045 to after 2100) | 2034 (2033 to 2035) | 2041 (2037 to 2043) |
| **Uganda** | UGA (AFRO) | 2060 (2054 to 2069) | 2055 (2051 to 2063) | 2039 (2036 to 2042) | 2060 (2054 to 2069) | 2060 (2054 to 2069) | 2039 (2036 to 2043) | 2043 (2042 to 2044) |
| **Ukraine** | UKR (EURO) | 2045 (2009 to 2061) | 2045 (2009 to 2061) | 2035 (2009 to 2038) | 2045 (2009 to 2061) | 2045 (2009 to 2061) | 2035 (2009 to 2038) | 2039 (2009 to 2042) |
| **Uzbekistan** | UZB (EURO) | 2039 (2036 to 2041) | 2039 (2036 to 2041) | 2039 (2036 to 2041) | 2039 (2036 to 2041) | 2039 (2036 to 2041) | 2039 (2036 to 2041) | 2039 (2036 to 2041) |
| **Venezuela** | VEN (PAHO) | 2034 (2018 to 2037) | 2034 (2018 to 2037) | 2030 (2018 to 2031) | 2034 (2018 to 2037) | 2034 (2018 to 2037) | 2031 (2018 to 2032) | 2033 (2018 to 2034) |
| **Viet Nam** | VNM (WPRO) | 2054 (2044 to 2065) | 2054 (2044 to 2065) | 2048 (2042 to 2054) | 2054 (2044 to 2065) | 2054 (2044 to 2065) | 2048 (2042 to 2055) | 2048 (2042 to 2055) |
| **Vanuatu** | VUT (WPRO) | 2072 (2060 to 2084) | 2072 (2060 to 2084) | 2063 (2056 to 2075) | 2072 (2060 to 2084) | 2072 (2060 to 2084) | 2064 (2056 to 2075) | 2065 (2056 to 2076) |
| **Samoa** | WSM (WPRO) | 2075 (2066 to 2095) | 2075 (2066 to 2095) | 2058 (2045 to 2065) | 2075 (2066 to 2095) | 2075 (2066 to 2095) | 2058 (2045 to 2065) | 2060 (2046 to 2068) |
| **Yemen** | YEM (EMRO) | 2099 (2064 to after 2100) | 2076 (2056 to after 2100) | 2035 (2034 to 2041) | 2099 (2064 to after 2100) | 2099 (2064 to after 2100) | 2035 (2034 to 2041) | 2043 (2042 to 2045) |
| **South Africa** | ZAF (AFRO) | after 2100 (2071 to after 2100) | after 2100 (2063 to after 2100) | 2053 (2041 to 2060) | after 2100 (2071 to after 2100) | after 2100 (2071 to after 2100) | 2054 (2041 to 2061) | 2057 (2045 to 2066) |
| **Zambia** | ZMB (AFRO) | 2026 (2024 to 2031) | 2026 (2024 to 2031) | 2026 (2024 to 2031) | 2026 (2024 to 2031) | 2026 (2024 to 2031) | 2026 (2024 to 2031) | 2026 (2024 to 2031) |
| **Zimbabwe** | ZWE (AFRO) | 2053 (2046 to 2061) | 2049 (2043 to 2056) | 2035 (2034 to 2037) | 2053 (2046 to 2061) | 2053 (2046 to 2061) | 2035 (2034 to 2037) | 2041 (2039 to 2042) |
| **Infant HBV vaccine series scaled up to 100% coverage in 2020** | | | | | | | | |
| **Afghanistan** | AFG (EMRO) | 2050 (2042 to 2067) | 2050 (2042 to 2067) | 2033 (2032 to 2035) | 2050 (2042 to 2067) | 2050 (2042 to 2067) | 2034 (2033 to 2035) | 2040 (2037 to 2042) |
| **Angola** | AGO (AFRO) | after 2100 (2069 to after 2100) | 2093 (2063 to after 2100) | 2056 (2045 to 2063) | after 2100 (2069 to after 2100) | after 2100 (2069 to after 2100) | 2056 (2046 to 2064) | 2059 (2046 to 2069) |
| **Albania** | ALB (EURO) | 2026 (2019 to 2028) | 2026 (2019 to 2028) | 2026 (2019 to 2028) | 2026 (2019 to 2028) | 2026 (2019 to 2028) | 2026 (2019 to 2028) | 2026 (2019 to 2028) |
| **Armenia** | ARM (EURO) | 2030 (2018 to 2033) | 2030 (2018 to 2033) | 2030 (2018 to 2033) | 2030 (2018 to 2033) | 2030 (2018 to 2033) | 2030 (2018 to 2033) | 2030 (2018 to 2033) |
| **Azerbaijan** | AZE (EURO) | 2033 (2027 to 2037) | 2033 (2027 to 2037) | 2033 (2027 to 2037) | 2033 (2027 to 2037) | 2033 (2027 to 2037) | 2033 (2027 to 2037) | 2033 (2027 to 2037) |
| **Burundi** | BDI (AFRO) | 2068 (2049 to 2096) | 2056 (2044 to 2069) | 2033 (2032 to 2033) | 2068 (2049 to 2096) | 2068 (2049 to 2096) | 2033 (2033 to 2034) | 2040 (2038 to 2041) |
| **Benin** | BEN (AFRO) | 2097 (2085 to after 2100) | 2085 (2076 to after 2100) | 2056 (2053 to 2063) | 2097 (2085 to after 2100) | 2097 (2085 to after 2100) | 2057 (2054 to 2064) | 2059 (2055 to 2070) |
| **Burkina Faso** | BFA (AFRO) | 2054 (2047 to 2070) | 2050 (2045 to 2062) | 2035 (2034 to 2038) | 2054 (2047 to 2070) | 2054 (2047 to 2070) | 2035 (2035 to 2038) | 2042 (2040 to 2043) |
| **Bangladesh** | BGD (SEARO) | 2096 (2072 to after 2100) | 2073 (2061 to 2094) | 2034 (2034 to 2035) | 2096 (2072 to after 2100) | 2096 (2072 to after 2100) | 2035 (2034 to 2035) | 2043 (2042 to 2044) |
| **Bosnia and Herzegovina** | BIH (EURO) | 2045 (2040 to 2069) | 2041 (2037 to 2056) | 2032 (2031 to 2033) | 2045 (2040 to 2069) | 2045 (2040 to 2069) | 2033 (2032 to 2033) | 2037 (2036 to 2039) |
| **Belarus** | BLR (EURO) | 2036 (2030 to 2039) | 2036 (2030 to 2039) | 2036 (2030 to 2039) | 2036 (2030 to 2039) | 2036 (2030 to 2039) | 2036 (2030 to 2039) | 2036 (2030 to 2039) |
| **Belize** | BLZ (PAHO) | 2019 (2008 to 2021) | 2019 (2008 to 2021) | 2019 (2008 to 2021) | 2019 (2008 to 2021) | 2019 (2008 to 2021) | 2019 (2008 to 2021) | 2019 (2008 to 2021) |
| **Bolivia** | BOL (PAHO) | 2035 (2029 to 2055) | 2032 (2028 to 2040) | 2029 (2027 to 2030) | 2035 (2029 to 2055) | 2035 (2029 to 2055) | 2030 (2028 to 2031) | 2032 (2029 to 2036) |
| **Bhutan** | BTN (SEARO) | 2038 (2031 to 2046) | 2038 (2031 to 2046) | 2035 (2030 to 2044) | 2038 (2031 to 2046) | 2038 (2031 to 2046) | 2035 (2030 to 2044) | 2037 (2031 to 2044) |
| **Central African Republic** | CAF (AFRO) | after 2100 (2099 to after 2100) | after 2100 (2088 to after 2100) | 2067 (2059 to 2079) | after 2100 (2099 to after 2100) | after 2100 (2099 to after 2100) | 2068 (2060 to 2080) | 2073 (2063 to 2085) |
| **China** | CHN (WPRO) | 2026 (2021 to 2031) | 2026 (2021 to 2031) | 2026 (2021 to 2031) | 2026 (2021 to 2031) | 2026 (2021 to 2031) | 2026 (2021 to 2031) | 2026 (2021 to 2031) |
| **Ivory Coast** | CIV (AFRO) | after 2100 (2062 to after 2100) | 2094 (2058 to after 2100) | 2048 (2038 to 2055) | after 2100 (2062 to after 2100) | after 2100 (2062 to after 2100) | 2049 (2038 to 2056) | 2051 (2043 to 2060) |
| **Cameroon** | CMR (AFRO) | after 2100 (2068 to after 2100) | 2091 (2062 to after 2100) | 2052 (2041 to 2059) | after 2100 (2068 to after 2100) | after 2100 (2068 to after 2100) | 2053 (2041 to 2060) | 2055 (2044 to 2064) |
| **Democratic Republic of the Congo** | COD (AFRO) | 2098 (2064 to after 2100) | 2082 (2059 to after 2100) | 2049 (2039 to 2056) | 2098 (2064 to after 2100) | 2098 (2064 to after 2100) | 2049 (2039 to 2057) | 2051 (2044 to 2061) |
| **Congo** | COG (AFRO) | after 2100 (2072 to after 2100) | 2096 (2067 to after 2100) | 2059 (2049 to 2067) | after 2100 (2072 to after 2100) | after 2100 (2072 to after 2100) | 2060 (2050 to 2068) | 2063 (2050 to 2074) |
| **Colombia** | COL (PAHO) | 2000 (2000 to 2000) | 2000 (2000 to 2000) | 2000 (2000 to 2000) | 2000 (2000 to 2000) | 2000 (2000 to 2000) | 2000 (2000 to 2000) | 2000 (2000 to 2000) |
| **Comoros** | COM (AFRO) | 2073 (2061 to 2098) | 2066 (2056 to 2084) | 2045 (2039 to 2052) | 2073 (2061 to 2098) | 2073 (2061 to 2098) | 2045 (2039 to 2053) | 2045 (2043 to 2055) |
| **Cape Verde** | CPV (AFRO) | 2044 (2039 to 2051) | 2044 (2039 to 2051) | 2044 (2039 to 2051) | 2044 (2039 to 2051) | 2044 (2039 to 2052) | 2044 (2039 to 2051) | 2044 (2039 to 2051) |
| **Cuba** | CUB (PAHO) | before 1980 (before 1980 to before 1980) | before 1980 (before 1980 to before 1980) | before 1980 (before 1980 to before 1980) | before 1980 (before 1980 to before 1980) | before 1980 (before 1980 to before 1980) | before 1980 (before 1980 to before 1980) | before 1980 (before 1980 to before 1980) |
| **Djibouti** | DJI (EMRO) | 2039 (2027 to 2045) | 2039 (2027 to 2045) | 2039 (2027 to 2045) | 2039 (2027 to 2045) | 2039 (2027 to 2045) | 2039 (2027 to 2045) | 2039 (2027 to 2045) |
| **Algeria** | DZA (AFRO) | 2024 (2011 to 2034) | 2024 (2011 to 2034) | 2024 (2011 to 2034) | 2024 (2011 to 2034) | 2024 (2011 to 2034) | 2024 (2011 to 2034) | 2024 (2011 to 2034) |
| **Ecuador** | ECU (PAHO) | 2033 (2026 to 2038) | 2033 (2026 to 2038) | 2028 (2026 to 2031) | 2033 (2027 to 2038) | 2033 (2027 to 2038) | 2030 (2026 to 2032) | 2031 (2026 to 2035) |
| **Egypt** | EGY (EMRO) | 2021 (2021 to 2022) | 2021 (2021 to 2022) | 2021 (2021 to 2022) | 2021 (2021 to 2022) | 2021 (2021 to 2022) | 2021 (2021 to 2022) | 2021 (2021 to 2022) |
| **Eritrea** | ERI (AFRO) | 2061 (2042 to 2094) | 2055 (2040 to 2074) | 2034 (2033 to 2035) | 2061 (2042 to 2094) | 2061 (2042 to 2094) | 2034 (2034 to 2035) | 2041 (2038 to 2043) |
| **Ethiopia** | ETH (AFRO) | 2054 (2048 to 2063) | 2050 (2045 to 2057) | 2035 (2034 to 2037) | 2054 (2048 to 2063) | 2054 (2048 to 2063) | 2035 (2034 to 2037) | 2042 (2040 to 2043) |
| **Fiji** | FJI (WPRO) | 2021 (2006 to 2027) | 2021 (2006 to 2027) | 2021 (2006 to 2027) | 2021 (2006 to 2027) | 2021 (2006 to 2027) | 2021 (2006 to 2027) | 2021 (2006 to 2027) |
| **Micronesia** | FSM (WPRO) | 2060 (2043 to 2070) | 2060 (2043 to 2070) | 2042 (2036 to 2055) | 2060 (2043 to 2070) | 2060 (2043 to 2070) | 2042 (2036 to 2056) | 2043 (2039 to 2057) |
| **Georgia** | GEO (EURO) | 2033 (2012 to 2037) | 2033 (2012 to 2037) | 2033 (2012 to 2037) | 2033 (2012 to 2037) | 2033 (2012 to 2037) | 2033 (2012 to 2037) | 2033 (2012 to 2037) |
| **Ghana** | GHA (AFRO) | after 2100 (2088 to after 2100) | after 2100 (2075 to after 2100) | 2055 (2044 to 2059) | after 2100 (2088 to after 2100) | after 2100 (2088 to after 2100) | 2056 (2044 to 2060) | 2059 (2045 to 2064) |
| **Guinea** | GIN (AFRO) | after 2100 (2088 to after 2100) | after 2100 (2080 to after 2100) | 2067 (2057 to 2077) | after 2100 (2088 to after 2100) | after 2100 (2088 to after 2100) | 2068 (2058 to 2078) | 2073 (2059 to 2084) |
| **Gambia** | GMB (AFRO) | 2062 (2038 to after 2100) | 2056 (2036 to 2087) | 2034 (2032 to 2035) | 2062 (2038 to after 2100) | 2062 (2038 to after 2100) | 2034 (2032 to 2035) | 2041 (2035 to 2044) |
| **Guinea-Bissau** | GNB (AFRO) | after 2100 (2072 to after 2100) | 2097 (2065 to after 2100) | 2054 (2046 to 2062) | after 2100 (2072 to after 2100) | after 2100 (2072 to after 2100) | 2055 (2046 to 2063) | 2059 (2047 to 2068) |
| **Guatemala** | GTM (PAHO) | 2012 (2011 to 2012) | 2012 (2011 to 2012) | 2012 (2011 to 2012) | 2012 (2011 to 2012) | 2012 (2011 to 2012) | 2012 (2011 to 2012) | 2012 (2011 to 2012) |
| **Guyana** | GUY (PAHO) | after 2100 (2064 to after 2100) | 2081 (2057 to after 2100) | 2040 (2035 to 2052) | after 2100 (2064 to after 2100) | after 2100 (2064 to after 2100) | 2040 (2035 to 2053) | 2045 (2042 to 2057) |
| **Honduras** | HND (PAHO) | 2041 (2036 to 2047) | 2041 (2036 to 2047) | 2035 (2032 to 2038) | 2041 (2036 to 2047) | 2041 (2036 to 2047) | 2035 (2032 to 2038) | 2038 (2034 to 2041) |
| **Haiti** | HTI (PAHO) | after 2100 (2074 to after 2100) | after 2100 (2065 to after 2100) | 2055 (2043 to 2061) | after 2100 (2074 to after 2100) | after 2100 (2074 to after 2100) | 2056 (2043 to 2062) | 2059 (2045 to 2068) |
| **Indonesia** | IDN (SEARO) | 2052 (2050 to 2055) | 2052 (2050 to 2055) | 2050 (2046 to 2053) | 2052 (2050 to 2055) | 2052 (2050 to 2056) | 2050 (2046 to 2053) | 2050 (2046 to 2053) |
| **India** | IND (SEARO) | 2062 (2045 to 2077) | 2062 (2045 to 2077) | 2044 (2034 to 2049) | 2062 (2045 to 2077) | 2062 (2045 to 2077) | 2044 (2034 to 2049) | 2045 (2040 to 2049) |
| **Iran** | IRN (EMRO) | 2005 (2005 to 2005) | 2005 (2005 to 2005) | 2005 (2005 to 2005) | 2005 (2005 to 2005) | 2005 (2005 to 2005) | 2005 (2005 to 2005) | 2005 (2005 to 2005) |
| **Iraq** | IRQ (EMRO) | 2046 (2039 to 2059) | 2046 (2039 to 2059) | 2034 (2033 to 2038) | 2046 (2039 to 2059) | 2046 (2039 to 2059) | 2034 (2033 to 2038) | 2039 (2036 to 2043) |
| **Jamaica** | JAM (PAHO) | 2095 (2070 to after 2100) | 2074 (2060 to 2100) | 2035 (2034 to 2040) | 2095 (2070 to after 2100) | 2095 (2070 to after 2100) | 2035 (2034 to 2040) | 2043 (2042 to 2045) |
| **Jordan** | JOR (EMRO) | 2000 (1993 to 2000) | 2000 (1993 to 2000) | 2000 (1993 to 2000) | 2000 (1993 to 2000) | 2000 (1993 to 2000) | 2000 (1993 to 2000) | 2000 (1993 to 2000) |
| **Kenya** | KEN (AFRO) | 2028 (2026 to 2030) | 2028 (2026 to 2029) | 2027 (2026 to 2028) | 2028 (2026 to 2030) | 2028 (2026 to 2030) | 2028 (2026 to 2029) | 2028 (2026 to 2030) |
| **Kyrgyzstan** | KGZ (EURO) | 2038 (2034 to 2041) | 2038 (2034 to 2041) | 2038 (2034 to 2041) | 2038 (2034 to 2041) | 2038 (2034 to 2041) | 2038 (2034 to 2041) | 2038 (2034 to 2041) |
| **Cambodia** | KHM (WPRO) | 2035 (2032 to 2038) | 2035 (2032 to 2038) | 2034 (2031 to 2037) | 2035 (2032 to 2038) | 2035 (2032 to 2038) | 2034 (2031 to 2037) | 2035 (2032 to 2037) |
| **Kiribati** | KIR (WPRO) | 2048 (2036 to 2056) | 2048 (2036 to 2056) | 2048 (2036 to 2056) | 2048 (2036 to 2056) | 2048 (2036 to 2056) | 2048 (2036 to 2056) | 2048 (2036 to 2056) |
| **Laos** | LAO (WPRO) | 2055 (2046 to 2066) | 2055 (2046 to 2066) | 2037 (2034 to 2045) | 2055 (2046 to 2066) | 2055 (2046 to 2066) | 2037 (2034 to 2045) | 2043 (2039 to 2045) |
| **Liberia** | LBR (AFRO) | after 2100 (2088 to after 2100) | after 2100 (2080 to after 2100) | 2065 (2056 to 2074) | after 2100 (2088 to after 2100) | after 2100 (2088 to after 2100) | 2066 (2057 to 2074) | 2071 (2059 to 2079) |
| **Sri Lanka** | LKA (SEARO) | 2056 (2043 to 2078) | 2047 (2041 to 2064) | 2034 (2033 to 2036) | 2056 (2043 to 2078) | 2056 (2043 to 2078) | 2034 (2034 to 2036) | 2040 (2038 to 2042) |
| **Lesotho** | LSO (AFRO) | 2088 (2058 to after 2100) | 2075 (2053 to after 2100) | 2045 (2037 to 2054) | 2088 (2058 to after 2100) | 2088 (2058 to after 2100) | 2045 (2037 to 2055) | 2046 (2043 to 2060) |
| **Morocco** | MAR (EMRO) | before 1980 (before 1980 to 1986) | before 1980 (before 1980 to 1986) | before 1980 (before 1980 to 1986) | before 1980 (before 1980 to 1986) | before 1980 (before 1980 to 1986) | before 1980 (before 1980 to 1986) | before 1980 (before 1980 to 1986) |
| **Moldova** | MDA (EURO) | 2043 (2040 to 2053) | 2043 (2040 to 2053) | 2043 (2040 to 2053) | 2043 (2040 to 2054) | 2043 (2040 to 2055) | 2043 (2040 to 2053) | 2043 (2040 to 2053) |
| **Madagascar** | MDG (AFRO) | after 2100 (2090 to after 2100) | 2089 (2073 to after 2100) | 2040 (2035 to 2046) | after 2100 (2090 to after 2100) | after 2100 (2090 to after 2100) | 2040 (2035 to 2048) | 2045 (2044 to 2049) |
| **Marshall Islands** | MHL (WPRO) | 2043 (2039 to 2056) | 2043 (2039 to 2056) | 2043 (2039 to 2056) | 2043 (2039 to 2056) | 2043 (2039 to 2057) | 2043 (2039 to 2056) | 2043 (2039 to 2056) |
| **North Macedonia** | MKD (EURO) | 2040 (2017 to 2044) | 2040 (2017 to 2044) | 2040 (2017 to 2044) | 2040 (2017 to 2044) | 2040 (2017 to 2044) | 2040 (2017 to 2044) | 2040 (2017 to 2044) |
| **Mali** | MLI (AFRO) | 2053 (2047 to 2060) | 2049 (2044 to 2055) | 2034 (2034 to 2035) | 2053 (2047 to 2060) | 2053 (2047 to 2060) | 2035 (2034 to 2035) | 2041 (2040 to 2042) |
| **Myanmar** | MMR (SEARO) | 2075 (2062 to after 2100) | 2072 (2060 to after 2100) | 2051 (2043 to 2060) | 2075 (2062 to after 2100) | 2075 (2062 to after 2100) | 2051 (2043 to 2061) | 2052 (2044 to 2064) |
| **Mongolia** | MNG (WPRO) | 2027 (2021 to 2029) | 2027 (2021 to 2029) | 2027 (2021 to 2029) | 2027 (2021 to 2029) | 2027 (2021 to 2029) | 2027 (2021 to 2029) | 2027 (2021 to 2029) |
| **Mozambique** | MOZ (AFRO) | after 2100 (2098 to after 2100) | after 2100 (2081 to after 2100) | 2052 (2046 to 2057) | after 2100 (2098 to after 2100) | after 2100 (2098 to after 2100) | 2053 (2046 to 2059) | 2056 (2047 to 2064) |
| **Mauritania** | MRT (AFRO) | after 2100 (after 2100 to after 2100) | after 2100 (2097 to after 2100) | 2064 (2058 to 2069) | after 2100 (after 2100 to after 2100) | after 2100 (after 2100 to after 2100) | 2065 (2059 to 2070) | 2069 (2063 to 2075) |
| **Malawi** | MWI (AFRO) | 2040 (2036 to 2046) | 2037 (2034 to 2042) | 2032 (2031 to 2033) | 2040 (2036 to 2046) | 2040 (2036 to 2046) | 2032 (2032 to 2033) | 2036 (2034 to 2038) |
| **Namibia** | NAM (AFRO) | 2039 (2035 to 2042) | 2039 (2035 to 2042) | 2035 (2030 to 2040) | 2039 (2035 to 2042) | 2039 (2035 to 2042) | 2035 (2031 to 2040) | 2037 (2033 to 2041) |
| **Niger** | NER (AFRO) | after 2100 (2090 to after 2100) | after 2100 (2081 to after 2100) | 2065 (2055 to 2073) | after 2100 (2090 to after 2100) | after 2100 (2090 to after 2100) | 2065 (2056 to 2074) | 2070 (2058 to 2079) |
| **Nigeria** | NGA (AFRO) | after 2100 (2094 to after 2100) | 2094 (2084 to after 2100) | 2059 (2056 to 2066) | after 2100 (2094 to after 2100) | after 2100 (2094 to after 2100) | 2060 (2056 to 2068) | 2063 (2058 to 2072) |
| **Nicaragua** | NIC (PAHO) | 2004 (2004 to 2004) | 2004 (2004 to 2004) | 2004 (2004 to 2004) | 2004 (2004 to 2004) | 2004 (2004 to 2004) | 2004 (2004 to 2004) | 2004 (2004 to 2004) |
| **Nepal** | NPL (SEARO) | 2049 (2036 to 2077) | 2041 (2034 to 2056) | 2032 (2031 to 2032) | 2049 (2036 to 2077) | 2049 (2036 to 2077) | 2032 (2032 to 2033) | 2037 (2034 to 2039) |
| **Pakistan** | PAK (EMRO) | after 2100 (2058 to after 2100) | 2085 (2052 to after 2100) | 2045 (2034 to 2055) | after 2100 (2058 to after 2100) | after 2100 (2058 to after 2100) | 2046 (2034 to 2057) | 2046 (2041 to 2061) |
| **Peru** | PER (PAHO) | 2008 (2008 to 2009) | 2008 (2008 to 2009) | 2008 (2008 to 2009) | 2008 (2008 to 2009) | 2008 (2008 to 2009) | 2008 (2008 to 2009) | 2008 (2008 to 2009) |
| **Philippines** | PHL (WPRO) | 2051 (2048 to 2054) | 2051 (2048 to 2054) | 2040 (2036 to 2044) | 2051 (2048 to 2054) | 2051 (2048 to 2054) | 2040 (2036 to 2044) | 2043 (2041 to 2044) |
| **Papua New Guinea** | PNG (WPRO) | 2092 (2068 to after 2100) | 2092 (2068 to after 2100) | 2056 (2048 to 2065) | 2092 (2068 to after 2100) | 2092 (2068 to after 2100) | 2057 (2048 to 2066) | 2059 (2048 to 2070) |
| **Korea, North** | PRK (SEARO) | 2041 (2039 to 2043) | 2041 (2039 to 2043) | 2041 (2039 to 2043) | 2041 (2039 to 2043) | 2041 (2039 to 2043) | 2041 (2039 to 2043) | 2041 (2039 to 2043) |
| **Paraguay** | PRY (PAHO) | 2085 (2054 to after 2100) | 2068 (2049 to 2099) | 2035 (2034 to 2043) | 2085 (2054 to after 2100) | 2085 (2054 to after 2100) | 2035 (2034 to 2043) | 2043 (2040 to 2045) |
| **Rwanda** | RWA (AFRO) | 2062 (2047 to 2083) | 2052 (2041 to 2063) | 2032 (2032 to 2033) | 2062 (2047 to 2083) | 2062 (2047 to 2083) | 2033 (2032 to 2034) | 2039 (2037 to 2041) |
| **Sudan** | SDN (EMRO) | after 2100 (2078 to after 2100) | 2090 (2068 to after 2100) | 2044 (2037 to 2054) | after 2100 (2078 to after 2100) | after 2100 (2078 to after 2100) | 2044 (2037 to 2056) | 2045 (2044 to 2059) |
| **Senegal** | SEN (AFRO) | 2043 (2038 to 2049) | 2043 (2038 to 2049) | 2037 (2034 to 2042) | 2043 (2038 to 2049) | 2043 (2038 to 2049) | 2037 (2034 to 2042) | 2040 (2036 to 2043) |
| **Solomon Islands** | SLB (WPRO) | 2051 (2045 to 2057) | 2051 (2045 to 2057) | 2043 (2037 to 2049) | 2051 (2045 to 2057) | 2051 (2045 to 2057) | 2043 (2037 to 2050) | 2044 (2041 to 2050) |
| **Sierra Leone** | SLE (AFRO) | 2092 (2080 to after 2100) | 2082 (2073 to 2096) | 2058 (2054 to 2063) | 2092 (2080 to after 2100) | 2092 (2080 to after 2100) | 2059 (2055 to 2064) | 2062 (2057 to 2068) |
| **El Salvador** | SLV (PAHO) | 2020 (2020 to 2020) | 2020 (2020 to 2020) | 2020 (2020 to 2020) | 2020 (2020 to 2020) | 2020 (2020 to 2020) | 2020 (2020 to 2020) | 2020 (2020 to 2020) |
| **Somalia** | SOM (EMRO) | after 2100 (2086 to after 2100) | after 2100 (2080 to after 2100) | 2066 (2057 to 2079) | after 2100 (2086 to after 2100) | after 2100 (2086 to after 2100) | 2066 (2057 to 2080) | 2071 (2060 to 2083) |
| **Serbia** | SRB (EURO) | 2018 (2010 to 2035) | 2018 (2010 to 2035) | 2018 (2010 to 2035) | 2018 (2010 to 2035) | 2018 (2010 to 2035) | 2018 (2010 to 2035) | 2018 (2010 to 2035) |
| **South Sudan** | SSD (AFRO) | after 2100 (2086 to after 2100) | 2094 (2081 to after 2100) | 2063 (2058 to 2073) | after 2100 (2086 to after 2100) | after 2100 (2086 to after 2100) | 2063 (2059 to 2073) | 2068 (2061 to 2076) |
| **Sao Tome and Principe** | STP (AFRO) | 2040 (2031 to 2046) | 2040 (2031 to 2046) | 2040 (2031 to 2046) | 2040 (2031 to 2046) | 2040 (2031 to 2046) | 2040 (2031 to 2046) | 2040 (2031 to 2046) |
| **Eswatini** | SWZ (AFRO) | 2050 (2039 to 2063) | 2046 (2036 to 2057) | 2033 (2032 to 2034) | 2050 (2039 to 2063) | 2050 (2039 to 2063) | 2034 (2032 to 2034) | 2039 (2035 to 2042) |
| **Syria** | SYR (EMRO) | 2061 (2056 to 2069) | 2058 (2053 to 2064) | 2037 (2034 to 2048) | 2061 (2056 to 2069) | 2061 (2056 to 2069) | 2037 (2035 to 2049) | 2044 (2042 to 2049) |
| **Chad** | TCD (AFRO) | after 2100 (after 2100 to after 2100) | after 2100 (2091 to after 2100) | 2070 (2061 to 2082) | after 2100 (after 2100 to after 2100) | after 2100 (after 2100 to after 2100) | 2071 (2062 to 2082) | 2076 (2065 to 2087) |
| **Togo** | TGO (AFRO) | after 2100 (2083 to after 2100) | after 2100 (2074 to after 2100) | 2059 (2051 to 2065) | after 2100 (2083 to after 2100) | after 2100 (2083 to after 2100) | 2060 (2052 to 2066) | 2064 (2054 to 2071) |
| **Thailand** | THA (SEARO) | 2022 (2022 to 2022) | 2022 (2022 to 2022) | 2022 (2022 to 2022) | 2022 (2022 to 2022) | 2022 (2022 to 2022) | 2022 (2022 to 2022) | 2022 (2022 to 2022) |
| **Tajikistan** | TJK (EURO) | 2033 (2029 to 2035) | 2033 (2029 to 2035) | 2033 (2029 to 2035) | 2033 (2029 to 2035) | 2033 (2029 to 2035) | 2033 (2029 to 2035) | 2033 (2029 to 2035) |
| **Turkmenistan** | TKM (EURO) | 2037 (2033 to 2040) | 2037 (2033 to 2040) | 2037 (2033 to 2040) | 2037 (2033 to 2040) | 2037 (2033 to 2040) | 2037 (2033 to 2040) | 2037 (2033 to 2040) |
| **Timor-Leste** | TLS (SEARO) | 2050 (2044 to 2055) | 2050 (2044 to 2055) | 2041 (2034 to 2047) | 2050 (2044 to 2055) | 2050 (2044 to 2055) | 2041 (2034 to 2047) | 2043 (2039 to 2047) |
| **Tonga** | TON (WPRO) | 2052 (2043 to 2063) | 2052 (2043 to 2063) | 2052 (2043 to 2063) | 2053 (2043 to 2064) | 2054 (2043 to 2064) | 2052 (2043 to 2063) | 2052 (2043 to 2063) |
| **Tunisia** | TUN (EMRO) | 2034 (2013 to 2035) | 2034 (2013 to 2035) | 2031 (2013 to 2031) | 2034 (2013 to 2035) | 2034 (2013 to 2035) | 2031 (2013 to 2032) | 2033 (2013 to 2034) |
| **Tuvalu** | TUV (WPRO) | 2040 (2035 to 2045) | 2040 (2035 to 2045) | 2040 (2035 to 2045) | 2040 (2035 to 2045) | 2040 (2035 to 2045) | 2040 (2035 to 2045) | 2040 (2035 to 2045) |
| **Tanzania** | TZA (AFRO) | 2068 (2043 to after 2100) | 2057 (2039 to 2075) | 2033 (2032 to 2034) | 2068 (2043 to after 2100) | 2068 (2043 to after 2100) | 2034 (2033 to 2035) | 2041 (2037 to 2043) |
| **Uganda** | UGA (AFRO) | 2058 (2053 to 2067) | 2054 (2050 to 2061) | 2039 (2035 to 2042) | 2058 (2053 to 2067) | 2058 (2053 to 2067) | 2039 (2035 to 2042) | 2043 (2042 to 2044) |
| **Ukraine** | UKR (EURO) | 2043 (2009 to 2057) | 2043 (2009 to 2057) | 2034 (2009 to 2036) | 2043 (2009 to 2057) | 2043 (2009 to 2057) | 2034 (2009 to 2036) | 2038 (2009 to 2041) |
| **Uzbekistan** | UZB (EURO) | 2038 (2036 to 2041) | 2038 (2036 to 2041) | 2038 (2036 to 2041) | 2038 (2036 to 2041) | 2038 (2036 to 2041) | 2038 (2036 to 2041) | 2038 (2036 to 2041) |
| **Venezuela** | VEN (PAHO) | 2033 (2018 to 2035) | 2033 (2018 to 2035) | 2029 (2018 to 2030) | 2033 (2018 to 2035) | 2033 (2018 to 2035) | 2030 (2018 to 2031) | 2032 (2018 to 2033) |
| **Viet Nam** | VNM (WPRO) | 2053 (2044 to 2063) | 2053 (2044 to 2063) | 2048 (2041 to 2054) | 2053 (2044 to 2063) | 2053 (2044 to 2064) | 2048 (2041 to 2054) | 2048 (2042 to 2054) |
| **Vanuatu** | VUT (WPRO) | 2069 (2058 to 2083) | 2069 (2058 to 2083) | 2062 (2055 to 2073) | 2069 (2058 to 2083) | 2070 (2058 to 2083) | 2062 (2055 to 2073) | 2063 (2055 to 2074) |
| **Samoa** | WSM (WPRO) | 2068 (2059 to 2083) | 2068 (2059 to 2083) | 2053 (2042 to 2061) | 2068 (2059 to 2084) | 2068 (2059 to 2084) | 2054 (2042 to 2061) | 2054 (2044 to 2063) |
| **Yemen** | YEM (EMRO) | 2089 (2056 to after 2100) | 2071 (2051 to 2097) | 2034 (2034 to 2037) | 2089 (2056 to after 2100) | 2089 (2056 to after 2100) | 2035 (2034 to 2038) | 2043 (2041 to 2044) |
| **South Africa** | ZAF (AFRO) | after 2100 (2064 to after 2100) | 2095 (2059 to after 2100) | 2051 (2038 to 2058) | after 2100 (2064 to after 2100) | after 2100 (2064 to after 2100) | 2052 (2038 to 2059) | 2054 (2044 to 2064) |
| **Zambia** | ZMB (AFRO) | 2025 (2024 to 2030) | 2025 (2024 to 2030) | 2025 (2024 to 2030) | 2026 (2024 to 2030) | 2026 (2024 to 2030) | 2025 (2024 to 2030) | 2025 (2024 to 2030) |
| **Zimbabwe** | ZWE (AFRO) | 2051 (2045 to 2058) | 2047 (2043 to 2054) | 2034 (2034 to 2037) | 2051 (2045 to 2058) | 2051 (2045 to 2058) | 2035 (2034 to 2037) | 2040 (2039 to 2042) |
| **Treatment level such that 40% of treatment-eligible individuals are in treatment in 2030** | | | | | | | | |
| **Afghanistan** | AFG (EMRO) | 2051 (2042 to 2059) | 2051 (2042 to 2059) | 2034 (2033 to 2035) | 2051 (2042 to 2059) | 2051 (2042 to 2059) | 2034 (2033 to 2036) | 2040 (2038 to 2041) |
| **Angola** | AGO (AFRO) | after 2100 (2079 to after 2100) | 2098 (2072 to after 2100) | 2057 (2049 to 2061) | after 2100 (2079 to after 2100) | after 2100 (2079 to after 2100) | 2058 (2050 to 2062) | 2062 (2051 to 2066) |
| **Albania** | ALB (EURO) | 2025 (2019 to 2028) | 2025 (2019 to 2028) | 2025 (2019 to 2028) | 2026 (2019 to 2028) | 2026 (2019 to 2028) | 2025 (2019 to 2028) | 2025 (2019 to 2028) |
| **Armenia** | ARM (EURO) | 2030 (2018 to 2032) | 2030 (2018 to 2032) | 2030 (2018 to 2032) | 2030 (2018 to 2032) | 2030 (2018 to 2032) | 2030 (2018 to 2032) | 2030 (2018 to 2032) |
| **Azerbaijan** | AZE (EURO) | 2033 (2027 to 2036) | 2033 (2027 to 2036) | 2033 (2027 to 2036) | 2033 (2027 to 2036) | 2033 (2027 to 2036) | 2033 (2027 to 2036) | 2033 (2027 to 2036) |
| **Burundi** | BDI (AFRO) | 2061 (2045 to 2068) | 2052 (2041 to 2056) | 2033 (2032 to 2033) | 2061 (2045 to 2068) | 2061 (2045 to 2068) | 2033 (2033 to 2034) | 2039 (2037 to 2040) |
| **Benin** | BEN (AFRO) | after 2100 (2091 to after 2100) | 2090 (2081 to after 2100) | 2058 (2055 to 2063) | after 2100 (2091 to after 2100) | after 2100 (2091 to after 2100) | 2059 (2056 to 2064) | 2062 (2058 to 2070) |
| **Burkina Faso** | BFA (AFRO) | 2053 (2046 to 2066) | 2049 (2044 to 2060) | 2035 (2034 to 2037) | 2053 (2046 to 2066) | 2053 (2046 to 2066) | 2035 (2035 to 2037) | 2041 (2040 to 2043) |
| **Bangladesh** | BGD (SEARO) | 2082 (2068 to 2091) | 2065 (2058 to 2070) | 2034 (2034 to 2035) | 2082 (2068 to 2091) | 2082 (2068 to 2091) | 2034 (2034 to 2035) | 2043 (2041 to 2043) |
| **Bosnia and Herzegovina** | BIH (EURO) | 2044 (2040 to 2056) | 2040 (2037 to 2047) | 2032 (2031 to 2032) | 2044 (2040 to 2056) | 2044 (2040 to 2056) | 2033 (2032 to 2033) | 2037 (2036 to 2038) |
| **Belarus** | BLR (EURO) | 2035 (2028 to 2038) | 2035 (2028 to 2038) | 2035 (2028 to 2038) | 2035 (2028 to 2038) | 2035 (2028 to 2038) | 2035 (2028 to 2038) | 2035 (2028 to 2038) |
| **Belize** | BLZ (PAHO) | 2019 (2008 to 2021) | 2019 (2008 to 2021) | 2019 (2008 to 2021) | 2019 (2008 to 2021) | 2019 (2008 to 2021) | 2019 (2008 to 2021) | 2019 (2008 to 2021) |
| **Bolivia** | BOL (PAHO) | 2035 (2030 to 2044) | 2032 (2029 to 2036) | 2029 (2028 to 2030) | 2035 (2030 to 2044) | 2035 (2030 to 2044) | 2030 (2029 to 2031) | 2033 (2030 to 2035) |
| **Bhutan** | BTN (SEARO) | 2037 (2027 to 2043) | 2037 (2027 to 2043) | 2034 (2026 to 2041) | 2037 (2027 to 2043) | 2037 (2027 to 2043) | 2034 (2026 to 2041) | 2036 (2027 to 2041) |
| **Central African Republic** | CAF (AFRO) | after 2100 (after 2100 to after 2100) | after 2100 (after 2100 to after 2100) | 2071 (2066 to 2077) | after 2100 (after 2100 to after 2100) | after 2100 (after 2100 to after 2100) | 2072 (2067 to 2078) | 2077 (2071 to 2082) |
| **China** | CHN (WPRO) | 2025 (2021 to 2030) | 2025 (2021 to 2030) | 2025 (2021 to 2030) | 2026 (2021 to 2030) | 2026 (2021 to 2030) | 2025 (2021 to 2030) | 2025 (2021 to 2030) |
| **Ivory Coast** | CIV (AFRO) | 2100 (2064 to after 2100) | 2087 (2060 to 2098) | 2046 (2038 to 2050) | 2100 (2064 to after 2100) | 2100 (2064 to after 2100) | 2047 (2038 to 2051) | 2048 (2043 to 2053) |
| **Cameroon** | CMR (AFRO) | after 2100 (2072 to after 2100) | 2089 (2066 to after 2100) | 2051 (2042 to 2055) | after 2100 (2072 to after 2100) | after 2100 (2072 to after 2100) | 2052 (2042 to 2056) | 2054 (2045 to 2060) |
| **Democratic Republic of the Congo** | COD (AFRO) | after 2100 (2074 to after 2100) | 2083 (2066 to 2097) | 2049 (2041 to 2053) | after 2100 (2074 to after 2100) | after 2100 (2074 to after 2100) | 2050 (2041 to 2054) | 2051 (2045 to 2057) |
| **Congo** | COG (AFRO) | after 2100 (2075 to after 2100) | 2094 (2069 to after 2100) | 2058 (2050 to 2063) | after 2100 (2075 to after 2100) | after 2100 (2075 to after 2100) | 2059 (2051 to 2064) | 2063 (2052 to 2069) |
| **Colombia** | COL (PAHO) | 2000 (2000 to 2000) | 2000 (2000 to 2000) | 2000 (2000 to 2000) | 2000 (2000 to 2000) | 2000 (2000 to 2000) | 2000 (2000 to 2000) | 2000 (2000 to 2000) |
| **Comoros** | COM (AFRO) | 2069 (2060 to 2088) | 2063 (2055 to 2075) | 2043 (2038 to 2049) | 2069 (2060 to 2088) | 2069 (2060 to 2088) | 2043 (2038 to 2049) | 2045 (2043 to 2050) |
| **Cape Verde** | CPV (AFRO) | 2043 (2039 to 2048) | 2043 (2039 to 2048) | 2043 (2039 to 2048) | 2043 (2039 to 2048) | 2043 (2039 to 2048) | 2043 (2039 to 2048) | 2043 (2039 to 2048) |
| **Cuba** | CUB (PAHO) | before 1980 (before 1980 to before 1980) | before 1980 (before 1980 to before 1980) | before 1980 (before 1980 to before 1980) | before 1980 (before 1980 to before 1980) | before 1980 (before 1980 to before 1980) | before 1980 (before 1980 to before 1980) | before 1980 (before 1980 to before 1980) |
| **Djibouti** | DJI (EMRO) | 2037 (2027 to 2042) | 2037 (2027 to 2042) | 2037 (2027 to 2042) | 2037 (2027 to 2042) | 2037 (2027 to 2042) | 2037 (2027 to 2042) | 2037 (2027 to 2042) |
| **Algeria** | DZA (AFRO) | 2022 (2011 to 2033) | 2022 (2011 to 2033) | 2022 (2011 to 2033) | 2022 (2011 to 2033) | 2022 (2011 to 2033) | 2022 (2011 to 2033) | 2022 (2011 to 2033) |
| **Ecuador** | ECU (PAHO) | 2032 (2027 to 2036) | 2032 (2027 to 2036) | 2028 (2026 to 2030) | 2032 (2027 to 2036) | 2032 (2027 to 2036) | 2029 (2027 to 2031) | 2031 (2027 to 2034) |
| **Egypt** | EGY (EMRO) | 2021 (2021 to 2021) | 2021 (2021 to 2021) | 2021 (2021 to 2021) | 2021 (2021 to 2021) | 2021 (2021 to 2021) | 2021 (2021 to 2021) | 2021 (2021 to 2021) |
| **Eritrea** | ERI (AFRO) | 2057 (2040 to 2082) | 2051 (2039 to 2066) | 2034 (2033 to 2035) | 2057 (2040 to 2082) | 2057 (2040 to 2082) | 2034 (2033 to 2035) | 2040 (2037 to 2043) |
| **Ethiopia** | ETH (AFRO) | 2060 (2051 to 2071) | 2055 (2048 to 2063) | 2037 (2035 to 2040) | 2060 (2051 to 2071) | 2060 (2051 to 2071) | 2037 (2035 to 2040) | 2043 (2042 to 2044) |
| **Fiji** | FJI (WPRO) | 2021 (2006 to 2027) | 2021 (2006 to 2027) | 2021 (2006 to 2027) | 2021 (2006 to 2027) | 2021 (2006 to 2027) | 2021 (2006 to 2027) | 2021 (2006 to 2027) |
| **Micronesia** | FSM (WPRO) | 2058 (2042 to 2065) | 2058 (2042 to 2065) | 2041 (2036 to 2045) | 2058 (2042 to 2065) | 2059 (2042 to 2065) | 2041 (2036 to 2045) | 2042 (2039 to 2045) |
| **Georgia** | GEO (EURO) | 2032 (2012 to 2036) | 2032 (2012 to 2036) | 2032 (2012 to 2036) | 2032 (2012 to 2036) | 2032 (2012 to 2036) | 2032 (2012 to 2036) | 2032 (2012 to 2036) |
| **Ghana** | GHA (AFRO) | after 2100 (2082 to after 2100) | 2096 (2072 to after 2100) | 2052 (2042 to 2055) | after 2100 (2082 to after 2100) | after 2100 (2082 to after 2100) | 2053 (2042 to 2056) | 2056 (2045 to 2060) |
| **Guinea** | GIN (AFRO) | after 2100 (after 2100 to after 2100) | after 2100 (after 2100 to after 2100) | 2070 (2064 to 2077) | after 2100 (after 2100 to after 2100) | after 2100 (after 2100 to after 2100) | 2071 (2065 to 2077) | 2076 (2069 to 2081) |
| **Gambia** | GMB (AFRO) | 2062 (2038 to 2097) | 2056 (2036 to 2079) | 2034 (2032 to 2035) | 2062 (2038 to 2097) | 2062 (2038 to 2097) | 2034 (2032 to 2035) | 2041 (2035 to 2044) |
| **Guinea-Bissau** | GNB (AFRO) | after 2100 (2072 to after 2100) | 2090 (2066 to after 2100) | 2053 (2046 to 2058) | after 2100 (2072 to after 2100) | after 2100 (2072 to after 2100) | 2054 (2046 to 2059) | 2057 (2047 to 2063) |
| **Guatemala** | GTM (PAHO) | 2012 (2011 to 2012) | 2012 (2011 to 2012) | 2012 (2011 to 2012) | 2012 (2011 to 2012) | 2012 (2011 to 2012) | 2012 (2011 to 2012) | 2012 (2011 to 2012) |
| **Guyana** | GUY (PAHO) | 2089 (2059 to after 2100) | 2073 (2053 to 2083) | 2036 (2034 to 2045) | 2089 (2059 to after 2100) | 2089 (2059 to after 2100) | 2036 (2034 to 2045) | 2044 (2042 to 2045) |
| **Honduras** | HND (PAHO) | 2041 (2035 to 2044) | 2041 (2035 to 2044) | 2034 (2032 to 2036) | 2041 (2035 to 2044) | 2041 (2035 to 2044) | 2034 (2032 to 2036) | 2037 (2034 to 2039) |
| **Haiti** | HTI (PAHO) | after 2100 (2086 to after 2100) | after 2100 (2076 to after 2100) | 2056 (2047 to 2059) | after 2100 (2086 to after 2100) | after 2100 (2086 to after 2100) | 2057 (2047 to 2060) | 2060 (2048 to 2065) |
| **Indonesia** | IDN (SEARO) | 2052 (2050 to 2054) | 2052 (2050 to 2054) | 2049 (2047 to 2051) | 2052 (2050 to 2054) | 2052 (2050 to 2054) | 2049 (2047 to 2051) | 2049 (2047 to 2051) |
| **India** | IND (SEARO) | 2059 (2044 to 2072) | 2059 (2044 to 2072) | 2043 (2034 to 2047) | 2059 (2044 to 2072) | 2059 (2044 to 2072) | 2043 (2035 to 2047) | 2044 (2040 to 2047) |
| **Iran** | IRN (EMRO) | 2005 (2005 to 2005) | 2005 (2005 to 2005) | 2005 (2005 to 2005) | 2005 (2005 to 2005) | 2005 (2005 to 2005) | 2005 (2005 to 2005) | 2005 (2005 to 2005) |
| **Iraq** | IRQ (EMRO) | 2045 (2039 to 2057) | 2045 (2039 to 2057) | 2034 (2033 to 2037) | 2045 (2039 to 2057) | 2045 (2039 to 2057) | 2034 (2033 to 2037) | 2039 (2036 to 2042) |
| **Jamaica** | JAM (PAHO) | 2081 (2066 to 2094) | 2066 (2057 to 2073) | 2034 (2034 to 2035) | 2081 (2066 to 2094) | 2081 (2066 to 2094) | 2035 (2034 to 2035) | 2043 (2041 to 2043) |
| **Jordan** | JOR (EMRO) | 2000 (1993 to 2000) | 2000 (1993 to 2000) | 2000 (1993 to 2000) | 2000 (1993 to 2000) | 2000 (1993 to 2000) | 2000 (1993 to 2000) | 2000 (1993 to 2000) |
| **Kenya** | KEN (AFRO) | 2028 (2026 to 2031) | 2028 (2026 to 2029) | 2027 (2026 to 2028) | 2028 (2026 to 2031) | 2028 (2026 to 2031) | 2028 (2026 to 2029) | 2028 (2026 to 2030) |
| **Kyrgyzstan** | KGZ (EURO) | 2037 (2034 to 2039) | 2037 (2034 to 2039) | 2037 (2034 to 2039) | 2037 (2034 to 2039) | 2037 (2034 to 2039) | 2037 (2034 to 2039) | 2037 (2034 to 2039) |
| **Cambodia** | KHM (WPRO) | 2034 (2032 to 2037) | 2034 (2032 to 2037) | 2034 (2031 to 2036) | 2034 (2032 to 2037) | 2034 (2032 to 2037) | 2034 (2031 to 2036) | 2034 (2032 to 2036) |
| **Kiribati** | KIR (WPRO) | 2046 (2036 to 2053) | 2046 (2036 to 2053) | 2046 (2036 to 2053) | 2046 (2036 to 2053) | 2046 (2036 to 2054) | 2046 (2036 to 2053) | 2046 (2036 to 2053) |
| **Laos** | LAO (WPRO) | 2054 (2047 to 2057) | 2054 (2047 to 2057) | 2036 (2034 to 2041) | 2054 (2047 to 2057) | 2054 (2047 to 2057) | 2036 (2034 to 2041) | 2042 (2040 to 2044) |
| **Liberia** | LBR (AFRO) | after 2100 (2094 to after 2100) | after 2100 (2084 to after 2100) | 2065 (2058 to 2069) | after 2100 (2094 to after 2100) | after 2100 (2094 to after 2100) | 2066 (2059 to 2070) | 2071 (2063 to 2075) |
| **Sri Lanka** | LKA (SEARO) | 2049 (2042 to 2065) | 2044 (2040 to 2057) | 2034 (2033 to 2035) | 2049 (2042 to 2065) | 2049 (2042 to 2065) | 2034 (2034 to 2035) | 2039 (2038 to 2041) |
| **Lesotho** | LSO (AFRO) | 2083 (2056 to after 2100) | 2071 (2051 to 2096) | 2043 (2036 to 2050) | 2083 (2056 to after 2100) | 2083 (2056 to after 2100) | 2044 (2036 to 2051) | 2045 (2042 to 2054) |
| **Morocco** | MAR (EMRO) | before 1980 (before 1980 to 1986) | before 1980 (before 1980 to 1986) | before 1980 (before 1980 to 1986) | before 1980 (before 1980 to 1986) | before 1980 (before 1980 to 1986) | before 1980 (before 1980 to 1986) | before 1980 (before 1980 to 1986) |
| **Moldova** | MDA (EURO) | 2042 (2039 to 2046) | 2042 (2039 to 2046) | 2042 (2039 to 2046) | 2042 (2039 to 2046) | 2042 (2039 to 2047) | 2042 (2039 to 2046) | 2042 (2039 to 2046) |
| **Madagascar** | MDG (AFRO) | after 2100 (2090 to after 2100) | 2088 (2073 to 2094) | 2039 (2035 to 2043) | after 2100 (2090 to after 2100) | after 2100 (2090 to after 2100) | 2039 (2035 to 2043) | 2045 (2044 to 2045) |
| **Marshall Islands** | MHL (WPRO) | 2043 (2039 to 2051) | 2043 (2039 to 2051) | 2043 (2039 to 2051) | 2043 (2039 to 2051) | 2043 (2039 to 2052) | 2043 (2039 to 2051) | 2043 (2039 to 2051) |
| **North Macedonia** | MKD (EURO) | 2038 (2017 to 2042) | 2038 (2017 to 2042) | 2038 (2017 to 2042) | 2038 (2017 to 2042) | 2038 (2017 to 2042) | 2038 (2017 to 2042) | 2038 (2017 to 2042) |
| **Mali** | MLI (AFRO) | 2056 (2050 to 2063) | 2052 (2046 to 2057) | 2035 (2035 to 2036) | 2056 (2050 to 2063) | 2056 (2050 to 2063) | 2035 (2035 to 2037) | 2042 (2041 to 2043) |
| **Myanmar** | MMR (SEARO) | 2072 (2060 to 2093) | 2069 (2059 to 2088) | 2049 (2043 to 2056) | 2072 (2060 to 2093) | 2072 (2060 to 2093) | 2049 (2043 to 2057) | 2050 (2044 to 2060) |
| **Mongolia** | MNG (WPRO) | 2026 (2021 to 2029) | 2026 (2021 to 2029) | 2026 (2021 to 2029) | 2026 (2021 to 2029) | 2026 (2021 to 2029) | 2026 (2021 to 2029) | 2026 (2021 to 2029) |
| **Mozambique** | MOZ (AFRO) | after 2100 (2095 to after 2100) | 2091 (2079 to 2096) | 2049 (2045 to 2051) | after 2100 (2095 to after 2100) | after 2100 (2095 to after 2100) | 2050 (2045 to 2053) | 2052 (2046 to 2056) |
| **Mauritania** | MRT (AFRO) | after 2100 (after 2100 to after 2100) | after 2100 (2097 to after 2100) | 2061 (2058 to 2064) | after 2100 (after 2100 to after 2100) | after 2100 (after 2100 to after 2100) | 2062 (2059 to 2065) | 2066 (2062 to 2069) |
| **Malawi** | MWI (AFRO) | 2038 (2036 to 2044) | 2036 (2034 to 2040) | 2031 (2031 to 2032) | 2038 (2036 to 2044) | 2038 (2036 to 2044) | 2032 (2032 to 2033) | 2035 (2034 to 2037) |
| **Namibia** | NAM (AFRO) | 2038 (2034 to 2040) | 2038 (2034 to 2040) | 2034 (2030 to 2038) | 2038 (2034 to 2040) | 2038 (2034 to 2040) | 2034 (2031 to 2038) | 2036 (2033 to 2039) |
| **Niger** | NER (AFRO) | after 2100 (2091 to after 2100) | after 2100 (2081 to after 2100) | 2063 (2055 to 2067) | after 2100 (2091 to after 2100) | after 2100 (2091 to after 2100) | 2064 (2056 to 2067) | 2069 (2059 to 2072) |
| **Nigeria** | NGA (AFRO) | after 2100 (after 2100 to after 2100) | after 2100 (after 2100 to after 2100) | 2065 (2062 to 2069) | after 2100 (after 2100 to after 2100) | after 2100 (after 2100 to after 2100) | 2066 (2063 to 2070) | 2070 (2067 to 2076) |
| **Nicaragua** | NIC (PAHO) | 2004 (2004 to 2004) | 2004 (2004 to 2004) | 2004 (2004 to 2004) | 2004 (2004 to 2004) | 2004 (2004 to 2004) | 2004 (2004 to 2004) | 2004 (2004 to 2004) |
| **Nepal** | NPL (SEARO) | 2045 (2035 to 2062) | 2039 (2034 to 2051) | 2031 (2031 to 2032) | 2045 (2035 to 2062) | 2045 (2035 to 2062) | 2032 (2031 to 2033) | 2036 (2034 to 2038) |
| **Pakistan** | PAK (EMRO) | after 2100 (2061 to after 2100) | 2086 (2055 to after 2100) | 2044 (2034 to 2053) | after 2100 (2061 to after 2100) | after 2100 (2061 to after 2100) | 2045 (2035 to 2054) | 2046 (2041 to 2058) |
| **Peru** | PER (PAHO) | 2008 (2008 to 2009) | 2008 (2008 to 2009) | 2008 (2008 to 2009) | 2008 (2008 to 2009) | 2008 (2008 to 2009) | 2008 (2008 to 2009) | 2008 (2008 to 2009) |
| **Philippines** | PHL (WPRO) | 2055 (2052 to 2057) | 2055 (2052 to 2057) | 2042 (2039 to 2044) | 2055 (2052 to 2057) | 2055 (2052 to 2057) | 2042 (2039 to 2045) | 2044 (2043 to 2045) |
| **Papua New Guinea** | PNG (WPRO) | after 2100 (after 2100 to after 2100) | after 2100 (after 2100 to after 2100) | 2062 (2057 to 2067) | after 2100 (after 2100 to after 2100) | after 2100 (after 2100 to after 2100) | 2063 (2058 to 2068) | 2067 (2061 to 2072) |
| **Korea, North** | PRK (SEARO) | 2041 (2039 to 2042) | 2041 (2039 to 2042) | 2041 (2039 to 2042) | 2041 (2039 to 2042) | 2041 (2039 to 2042) | 2041 (2039 to 2042) | 2041 (2039 to 2042) |
| **Paraguay** | PRY (PAHO) | 2077 (2052 to 2095) | 2064 (2047 to 2074) | 2035 (2034 to 2035) | 2077 (2052 to 2095) | 2077 (2052 to 2095) | 2035 (2034 to 2036) | 2043 (2040 to 2044) |
| **Rwanda** | RWA (AFRO) | 2055 (2042 to 2060) | 2047 (2038 to 2051) | 2032 (2031 to 2032) | 2055 (2042 to 2060) | 2055 (2042 to 2060) | 2033 (2032 to 2033) | 2038 (2036 to 2039) |
| **Sudan** | SDN (EMRO) | 2097 (2075 to after 2100) | 2079 (2066 to 2087) | 2040 (2035 to 2044) | 2097 (2075 to after 2100) | 2097 (2075 to after 2100) | 2040 (2035 to 2044) | 2045 (2044 to 2045) |
| **Senegal** | SEN (AFRO) | 2043 (2038 to 2048) | 2043 (2038 to 2048) | 2036 (2033 to 2041) | 2043 (2038 to 2048) | 2043 (2038 to 2048) | 2036 (2034 to 2041) | 2039 (2036 to 2043) |
| **Solomon Islands** | SLB (WPRO) | 2049 (2044 to 2054) | 2049 (2044 to 2054) | 2042 (2036 to 2046) | 2049 (2044 to 2054) | 2049 (2045 to 2054) | 2042 (2036 to 2046) | 2043 (2040 to 2047) |
| **Sierra Leone** | SLE (AFRO) | 2087 (2078 to 2099) | 2078 (2072 to 2088) | 2057 (2053 to 2060) | 2087 (2078 to 2099) | 2087 (2078 to 2099) | 2058 (2054 to 2061) | 2060 (2055 to 2064) |
| **El Salvador** | SLV (PAHO) | 2020 (2020 to 2020) | 2020 (2020 to 2020) | 2020 (2020 to 2020) | 2020 (2020 to 2020) | 2020 (2020 to 2020) | 2020 (2020 to 2020) | 2020 (2020 to 2020) |
| **Somalia** | SOM (EMRO) | after 2100 (after 2100 to after 2100) | after 2100 (after 2100 to after 2100) | 2073 (2065 to 2082) | after 2100 (after 2100 to after 2100) | after 2100 (after 2100 to after 2100) | 2074 (2066 to 2083) | 2078 (2071 to 2087) |
| **Serbia** | SRB (EURO) | 2018 (2010 to 2033) | 2018 (2010 to 2033) | 2018 (2010 to 2033) | 2018 (2010 to 2033) | 2018 (2010 to 2033) | 2018 (2010 to 2033) | 2018 (2010 to 2033) |
| **South Sudan** | SSD (AFRO) | after 2100 (after 2100 to after 2100) | after 2100 (after 2100 to after 2100) | 2080 (2070 to 2090) | after 2100 (after 2100 to after 2100) | after 2100 (after 2100 to after 2100) | 2080 (2071 to 2090) | 2083 (2076 to 2093) |
| **Sao Tome and Principe** | STP (AFRO) | 2038 (2030 to 2043) | 2038 (2030 to 2043) | 2038 (2030 to 2043) | 2038 (2030 to 2043) | 2038 (2030 to 2043) | 2038 (2030 to 2043) | 2038 (2030 to 2043) |
| **Eswatini** | SWZ (AFRO) | 2048 (2038 to 2060) | 2044 (2035 to 2054) | 2033 (2031 to 2034) | 2048 (2038 to 2060) | 2048 (2038 to 2060) | 2033 (2032 to 2034) | 2038 (2035 to 2041) |
| **Syria** | SYR (EMRO) | 2071 (2065 to 2084) | 2065 (2061 to 2072) | 2045 (2037 to 2052) | 2071 (2065 to 2084) | 2071 (2065 to 2084) | 2045 (2038 to 2052) | 2047 (2044 to 2053) |
| **Chad** | TCD (AFRO) | after 2100 (after 2100 to after 2100) | after 2100 (after 2100 to after 2100) | 2072 (2068 to 2078) | after 2100 (after 2100 to after 2100) | after 2100 (after 2100 to after 2100) | 2073 (2069 to 2079) | 2078 (2073 to 2083) |
| **Togo** | TGO (AFRO) | after 2100 (2082 to after 2100) | 2099 (2074 to after 2100) | 2057 (2051 to 2060) | after 2100 (2082 to after 2100) | after 2100 (2082 to after 2100) | 2058 (2051 to 2061) | 2062 (2053 to 2066) |
| **Thailand** | THA (SEARO) | 2022 (2022 to 2022) | 2022 (2022 to 2022) | 2022 (2022 to 2022) | 2022 (2022 to 2022) | 2022 (2022 to 2022) | 2022 (2022 to 2022) | 2022 (2022 to 2022) |
| **Tajikistan** | TJK (EURO) | 2032 (2028 to 2034) | 2032 (2028 to 2034) | 2032 (2028 to 2034) | 2032 (2028 to 2034) | 2032 (2028 to 2034) | 2032 (2028 to 2034) | 2032 (2028 to 2034) |
| **Turkmenistan** | TKM (EURO) | 2037 (2033 to 2039) | 2037 (2033 to 2039) | 2037 (2033 to 2039) | 2037 (2033 to 2039) | 2037 (2033 to 2039) | 2037 (2033 to 2039) | 2037 (2033 to 2039) |
| **Timor-Leste** | TLS (SEARO) | 2049 (2044 to 2052) | 2049 (2044 to 2052) | 2039 (2034 to 2044) | 2049 (2044 to 2052) | 2049 (2044 to 2052) | 2039 (2034 to 2044) | 2042 (2040 to 2045) |
| **Tonga** | TON (WPRO) | 2049 (2042 to 2058) | 2049 (2042 to 2058) | 2049 (2042 to 2058) | 2049 (2042 to 2059) | 2049 (2042 to 2060) | 2049 (2042 to 2058) | 2049 (2042 to 2058) |
| **Tunisia** | TUN (EMRO) | 2034 (2013 to 2034) | 2034 (2013 to 2034) | 2031 (2013 to 2031) | 2034 (2013 to 2034) | 2034 (2013 to 2034) | 2031 (2013 to 2032) | 2033 (2013 to 2033) |
| **Tuvalu** | TUV (WPRO) | 2039 (2035 to 2043) | 2039 (2035 to 2043) | 2039 (2035 to 2043) | 2039 (2035 to 2043) | 2039 (2035 to 2043) | 2039 (2035 to 2043) | 2039 (2035 to 2043) |
| **Tanzania** | TZA (AFRO) | 2063 (2043 to 2086) | 2054 (2039 to 2065) | 2033 (2032 to 2034) | 2063 (2043 to 2086) | 2063 (2043 to 2086) | 2034 (2033 to 2034) | 2040 (2037 to 2042) |
| **Uganda** | UGA (AFRO) | 2057 (2052 to 2064) | 2053 (2049 to 2059) | 2038 (2035 to 2040) | 2057 (2052 to 2064) | 2057 (2052 to 2064) | 2038 (2035 to 2040) | 2043 (2042 to 2044) |
| **Ukraine** | UKR (EURO) | 2043 (2009 to 2051) | 2043 (2009 to 2051) | 2034 (2009 to 2036) | 2043 (2009 to 2051) | 2043 (2009 to 2051) | 2034 (2009 to 2036) | 2038 (2009 to 2040) |
| **Uzbekistan** | UZB (EURO) | 2038 (2036 to 2040) | 2038 (2036 to 2040) | 2038 (2036 to 2040) | 2038 (2036 to 2040) | 2038 (2036 to 2040) | 2038 (2036 to 2040) | 2038 (2036 to 2040) |
| **Venezuela** | VEN (PAHO) | 2033 (2018 to 2035) | 2033 (2018 to 2035) | 2029 (2018 to 2030) | 2033 (2018 to 2035) | 2033 (2018 to 2035) | 2030 (2018 to 2031) | 2032 (2018 to 2033) |
| **Viet Nam** | VNM (WPRO) | 2052 (2044 to 2057) | 2052 (2044 to 2057) | 2047 (2041 to 2051) | 2052 (2044 to 2058) | 2052 (2044 to 2058) | 2047 (2041 to 2051) | 2047 (2042 to 2051) |
| **Vanuatu** | VUT (WPRO) | 2066 (2058 to 2076) | 2066 (2058 to 2076) | 2060 (2055 to 2067) | 2066 (2058 to 2076) | 2066 (2058 to 2076) | 2061 (2055 to 2067) | 2061 (2055 to 2068) |
| **Samoa** | WSM (WPRO) | 2069 (2062 to 2074) | 2069 (2062 to 2074) | 2054 (2043 to 2059) | 2069 (2062 to 2074) | 2070 (2063 to 2074) | 2054 (2043 to 2059) | 2055 (2045 to 2061) |
| **Yemen** | YEM (EMRO) | 2084 (2058 to 2098) | 2068 (2052 to 2076) | 2034 (2034 to 2035) | 2084 (2058 to 2098) | 2084 (2058 to 2098) | 2035 (2034 to 2035) | 2043 (2041 to 2044) |
| **South Africa** | ZAF (AFRO) | after 2100 (2067 to after 2100) | 2090 (2061 to after 2100) | 2050 (2038 to 2054) | after 2100 (2067 to after 2100) | after 2100 (2067 to after 2100) | 2050 (2038 to 2055) | 2052 (2044 to 2059) |
| **Zambia** | ZMB (AFRO) | 2025 (2024 to 2029) | 2025 (2024 to 2029) | 2025 (2024 to 2029) | 2026 (2024 to 2029) | 2026 (2024 to 2029) | 2025 (2024 to 2029) | 2025 (2024 to 2029) |
| **Zimbabwe** | ZWE (AFRO) | 2049 (2046 to 2055) | 2046 (2043 to 2051) | 2034 (2034 to 2035) | 2049 (2046 to 2055) | 2049 (2046 to 2055) | 2035 (2034 to 2035) | 2040 (2039 to 2041) |
| **Treatment level such that 80% of treatment-eligible individuals are in treatment in 2030** | | | | | | | | |
| **Afghanistan** | AFG (EMRO) | 2041 (2036 to 2047) | 2041 (2036 to 2047) | 2032 (2031 to 2033) | 2041 (2036 to 2047) | 2041 (2036 to 2047) | 2032 (2031 to 2033) | 2036 (2034 to 2038) |
| **Angola** | AGO (AFRO) | 2081 (2060 to 2097) | 2072 (2056 to 2084) | 2049 (2040 to 2052) | 2081 (2060 to 2097) | 2081 (2060 to 2097) | 2049 (2040 to 2053) | 2050 (2044 to 2055) |
| **Albania** | ALB (EURO) | 2024 (2019 to 2026) | 2024 (2019 to 2026) | 2024 (2019 to 2026) | 2024 (2019 to 2026) | 2024 (2019 to 2026) | 2024 (2019 to 2026) | 2024 (2019 to 2026) |
| **Armenia** | ARM (EURO) | 2026 (2018 to 2030) | 2026 (2018 to 2030) | 2026 (2018 to 2030) | 2026 (2018 to 2030) | 2027 (2018 to 2030) | 2026 (2018 to 2030) | 2026 (2018 to 2030) |
| **Azerbaijan** | AZE (EURO) | 2030 (2022 to 2033) | 2030 (2022 to 2033) | 2030 (2022 to 2033) | 2030 (2022 to 2033) | 2030 (2022 to 2033) | 2030 (2022 to 2033) | 2030 (2022 to 2033) |
| **Burundi** | BDI (AFRO) | 2045 (2038 to 2048) | 2040 (2034 to 2043) | 2031 (2030 to 2032) | 2045 (2038 to 2048) | 2045 (2038 to 2048) | 2032 (2031 to 2033) | 2036 (2034 to 2037) |
| **Benin** | BEN (AFRO) | 2084 (2073 to after 2100) | 2075 (2067 to after 2100) | 2053 (2049 to 2059) | 2084 (2073 to after 2100) | 2084 (2073 to after 2100) | 2053 (2049 to 2060) | 2055 (2049 to 2064) |
| **Burkina Faso** | BFA (AFRO) | 2046 (2042 to 2055) | 2044 (2040 to 2051) | 2034 (2033 to 2035) | 2046 (2042 to 2055) | 2046 (2042 to 2055) | 2034 (2034 to 2035) | 2039 (2038 to 2041) |
| **Bangladesh** | BGD (SEARO) | 2056 (2052 to 2060) | 2050 (2047 to 2053) | 2033 (2033 to 2034) | 2056 (2052 to 2060) | 2056 (2052 to 2060) | 2034 (2033 to 2034) | 2040 (2039 to 2041) |
| **Bosnia and Herzegovina** | BIH (EURO) | 2038 (2034 to 2042) | 2034 (2032 to 2036) | 2030 (2029 to 2030) | 2038 (2034 to 2042) | 2038 (2034 to 2042) | 2031 (2030 to 2031) | 2034 (2032 to 2035) |
| **Belarus** | BLR (EURO) | 2031 (2025 to 2035) | 2031 (2025 to 2035) | 2031 (2025 to 2035) | 2031 (2026 to 2035) | 2031 (2026 to 2035) | 2031 (2025 to 2035) | 2031 (2025 to 2035) |
| **Belize** | BLZ (PAHO) | 2018 (2008 to 2020) | 2018 (2008 to 2020) | 2018 (2008 to 2020) | 2018 (2008 to 2020) | 2018 (2008 to 2020) | 2018 (2008 to 2020) | 2018 (2008 to 2020) |
| **Bolivia** | BOL (PAHO) | 2030 (2026 to 2034) | 2029 (2026 to 2031) | 2027 (2026 to 2028) | 2030 (2026 to 2034) | 2030 (2026 to 2034) | 2029 (2026 to 2030) | 2030 (2026 to 2032) |
| **Bhutan** | BTN (SEARO) | 2032 (2023 to 2038) | 2032 (2023 to 2038) | 2031 (2023 to 2035) | 2032 (2023 to 2038) | 2032 (2023 to 2038) | 2031 (2023 to 2035) | 2032 (2023 to 2036) |
| **Central African Republic** | CAF (AFRO) | after 2100 (2087 to after 2100) | 2094 (2079 to after 2100) | 2061 (2057 to 2064) | after 2100 (2087 to after 2100) | after 2100 (2087 to after 2100) | 2062 (2057 to 2065) | 2065 (2060 to 2070) |
| **China** | CHN (WPRO) | 2024 (2021 to 2027) | 2024 (2021 to 2027) | 2024 (2021 to 2027) | 2024 (2021 to 2027) | 2024 (2021 to 2027) | 2024 (2021 to 2027) | 2024 (2021 to 2027) |
| **Ivory Coast** | CIV (AFRO) | 2071 (2051 to 2082) | 2065 (2049 to 2074) | 2037 (2034 to 2041) | 2071 (2051 to 2082) | 2071 (2051 to 2082) | 2037 (2034 to 2041) | 2044 (2041 to 2045) |
| **Cameroon** | CMR (AFRO) | 2073 (2056 to 2088) | 2065 (2052 to 2075) | 2040 (2035 to 2045) | 2073 (2056 to 2088) | 2073 (2056 to 2088) | 2040 (2035 to 2045) | 2044 (2042 to 2046) |
| **Democratic Republic of the Congo** | COD (AFRO) | 2066 (2055 to 2078) | 2060 (2051 to 2067) | 2037 (2035 to 2041) | 2066 (2055 to 2078) | 2066 (2055 to 2078) | 2037 (2035 to 2041) | 2044 (2042 to 2045) |
| **Congo** | COG (AFRO) | 2080 (2059 to after 2100) | 2072 (2056 to 2088) | 2050 (2042 to 2055) | 2080 (2059 to after 2100) | 2080 (2059 to after 2100) | 2051 (2042 to 2056) | 2052 (2044 to 2058) |
| **Colombia** | COL (PAHO) | 2000 (2000 to 2000) | 2000 (2000 to 2000) | 2000 (2000 to 2000) | 2000 (2000 to 2000) | 2000 (2000 to 2000) | 2000 (2000 to 2000) | 2000 (2000 to 2000) |
| **Comoros** | COM (AFRO) | 2055 (2048 to 2069) | 2052 (2045 to 2062) | 2036 (2035 to 2040) | 2055 (2048 to 2069) | 2055 (2048 to 2069) | 2036 (2035 to 2040) | 2042 (2040 to 2044) |
| **Cape Verde** | CPV (AFRO) | 2039 (2035 to 2042) | 2039 (2035 to 2042) | 2039 (2035 to 2042) | 2039 (2035 to 2042) | 2039 (2035 to 2042) | 2039 (2035 to 2042) | 2039 (2035 to 2042) |
| **Cuba** | CUB (PAHO) | before 1980 (before 1980 to before 1980) | before 1980 (before 1980 to before 1980) | before 1980 (before 1980 to before 1980) | before 1980 (before 1980 to before 1980) | before 1980 (before 1980 to before 1980) | before 1980 (before 1980 to before 1980) | before 1980 (before 1980 to before 1980) |
| **Djibouti** | DJI (EMRO) | 2029 (2024 to 2034) | 2029 (2024 to 2034) | 2029 (2024 to 2034) | 2029 (2024 to 2034) | 2029 (2024 to 2034) | 2029 (2024 to 2034) | 2029 (2024 to 2034) |
| **Algeria** | DZA (AFRO) | 2021 (2011 to 2027) | 2021 (2011 to 2027) | 2021 (2011 to 2027) | 2021 (2011 to 2027) | 2021 (2011 to 2027) | 2021 (2011 to 2027) | 2021 (2011 to 2027) |
| **Ecuador** | ECU (PAHO) | 2027 (2024 to 2029) | 2027 (2024 to 2029) | 2026 (2024 to 2027) | 2027 (2024 to 2029) | 2027 (2024 to 2029) | 2027 (2024 to 2029) | 2027 (2024 to 2029) |
| **Egypt** | EGY (EMRO) | 2021 (2021 to 2021) | 2021 (2021 to 2021) | 2021 (2021 to 2021) | 2021 (2021 to 2021) | 2021 (2021 to 2021) | 2021 (2021 to 2021) | 2021 (2021 to 2021) |
| **Eritrea** | ERI (AFRO) | 2045 (2036 to 2059) | 2041 (2034 to 2053) | 2033 (2031 to 2034) | 2045 (2036 to 2059) | 2045 (2036 to 2059) | 2033 (2032 to 2034) | 2037 (2034 to 2041) |
| **Ethiopia** | ETH (AFRO) | 2053 (2047 to 2061) | 2050 (2045 to 2056) | 2035 (2034 to 2038) | 2053 (2047 to 2061) | 2053 (2047 to 2061) | 2035 (2034 to 2038) | 2042 (2040 to 2043) |
| **Fiji** | FJI (WPRO) | 2021 (2006 to 2024) | 2021 (2006 to 2024) | 2021 (2006 to 2024) | 2021 (2006 to 2024) | 2021 (2006 to 2025) | 2021 (2006 to 2024) | 2021 (2006 to 2024) |
| **Micronesia** | FSM (WPRO) | 2043 (2037 to 2048) | 2043 (2037 to 2048) | 2037 (2033 to 2040) | 2043 (2037 to 2048) | 2043 (2037 to 2048) | 2037 (2034 to 2040) | 2040 (2036 to 2042) |
| **Georgia** | GEO (EURO) | 2029 (2012 to 2032) | 2029 (2012 to 2032) | 2029 (2012 to 2032) | 2029 (2012 to 2032) | 2029 (2012 to 2032) | 2029 (2012 to 2032) | 2029 (2012 to 2032) |
| **Ghana** | GHA (AFRO) | 2084 (2068 to 2098) | 2073 (2062 to 2083) | 2043 (2038 to 2047) | 2084 (2068 to 2098) | 2084 (2068 to 2098) | 2044 (2038 to 2048) | 2045 (2044 to 2048) |
| **Guinea** | GIN (AFRO) | after 2100 (2082 to after 2100) | 2092 (2075 to after 2100) | 2060 (2055 to 2063) | after 2100 (2082 to after 2100) | after 2100 (2082 to after 2100) | 2061 (2056 to 2064) | 2064 (2057 to 2068) |
| **Gambia** | GMB (AFRO) | 2054 (2034 to 2074) | 2050 (2033 to 2063) | 2033 (2030 to 2034) | 2054 (2034 to 2074) | 2054 (2034 to 2074) | 2034 (2031 to 2035) | 2040 (2033 to 2043) |
| **Guinea-Bissau** | GNB (AFRO) | 2073 (2055 to 2091) | 2066 (2052 to 2079) | 2044 (2038 to 2048) | 2073 (2055 to 2091) | 2073 (2055 to 2091) | 2044 (2038 to 2049) | 2045 (2043 to 2050) |
| **Guatemala** | GTM (PAHO) | 2012 (2011 to 2012) | 2012 (2011 to 2012) | 2012 (2011 to 2012) | 2012 (2011 to 2012) | 2012 (2011 to 2012) | 2012 (2011 to 2012) | 2012 (2011 to 2012) |
| **Guyana** | GUY (PAHO) | 2060 (2046 to 2070) | 2054 (2043 to 2061) | 2034 (2033 to 2035) | 2060 (2046 to 2070) | 2060 (2046 to 2070) | 2034 (2033 to 2035) | 2042 (2038 to 2043) |
| **Honduras** | HND (PAHO) | 2036 (2031 to 2039) | 2036 (2031 to 2039) | 2032 (2029 to 2033) | 2036 (2031 to 2039) | 2036 (2031 to 2039) | 2032 (2030 to 2033) | 2034 (2031 to 2036) |
| **Haiti** | HTI (PAHO) | 2084 (2062 to 2093) | 2073 (2057 to 2080) | 2046 (2037 to 2049) | 2084 (2062 to 2093) | 2084 (2062 to 2093) | 2046 (2038 to 2050) | 2046 (2044 to 2050) |
| **Indonesia** | IDN (SEARO) | 2047 (2045 to 2048) | 2047 (2045 to 2048) | 2043 (2041 to 2045) | 2047 (2045 to 2048) | 2047 (2045 to 2048) | 2043 (2041 to 2045) | 2044 (2042 to 2045) |
| **India** | IND (SEARO) | 2051 (2041 to 2058) | 2051 (2041 to 2058) | 2039 (2033 to 2043) | 2051 (2041 to 2058) | 2051 (2041 to 2058) | 2039 (2033 to 2043) | 2043 (2037 to 2044) |
| **Iran** | IRN (EMRO) | 2005 (2005 to 2005) | 2005 (2005 to 2005) | 2005 (2005 to 2005) | 2005 (2005 to 2005) | 2005 (2005 to 2005) | 2005 (2005 to 2005) | 2005 (2005 to 2005) |
| **Iraq** | IRQ (EMRO) | 2038 (2035 to 2048) | 2038 (2035 to 2048) | 2032 (2031 to 2034) | 2038 (2035 to 2048) | 2038 (2035 to 2048) | 2033 (2032 to 2034) | 2036 (2033 to 2039) |
| **Jamaica** | JAM (PAHO) | 2056 (2049 to 2062) | 2050 (2045 to 2055) | 2033 (2033 to 2034) | 2056 (2049 to 2062) | 2056 (2049 to 2062) | 2034 (2033 to 2034) | 2040 (2039 to 2041) |
| **Jordan** | JOR (EMRO) | 2000 (1993 to 2000) | 2000 (1993 to 2000) | 2000 (1993 to 2000) | 2000 (1993 to 2000) | 2000 (1993 to 2000) | 2000 (1993 to 2000) | 2000 (1993 to 2000) |
| **Kenya** | KEN (AFRO) | 2026 (2024 to 2029) | 2026 (2024 to 2028) | 2026 (2024 to 2027) | 2026 (2024 to 2029) | 2026 (2024 to 2029) | 2026 (2024 to 2028) | 2026 (2024 to 2029) |
| **Kyrgyzstan** | KGZ (EURO) | 2034 (2031 to 2036) | 2034 (2031 to 2036) | 2034 (2031 to 2036) | 2034 (2031 to 2036) | 2034 (2031 to 2036) | 2034 (2031 to 2036) | 2034 (2031 to 2036) |
| **Cambodia** | KHM (WPRO) | 2031 (2027 to 2033) | 2031 (2027 to 2033) | 2031 (2027 to 2032) | 2031 (2027 to 2033) | 2031 (2027 to 2033) | 2031 (2027 to 2032) | 2031 (2027 to 2033) |
| **Kiribati** | KIR (WPRO) | 2038 (2032 to 2044) | 2038 (2032 to 2044) | 2038 (2032 to 2044) | 2038 (2032 to 2044) | 2038 (2032 to 2044) | 2038 (2032 to 2044) | 2038 (2032 to 2044) |
| **Laos** | LAO (WPRO) | 2045 (2039 to 2047) | 2045 (2039 to 2047) | 2033 (2032 to 2034) | 2045 (2039 to 2047) | 2045 (2039 to 2047) | 2034 (2033 to 2034) | 2038 (2036 to 2040) |
| **Liberia** | LBR (AFRO) | 2094 (2070 to after 2100) | 2084 (2065 to after 2100) | 2057 (2050 to 2061) | 2094 (2070 to after 2100) | 2094 (2070 to after 2100) | 2058 (2051 to 2062) | 2060 (2052 to 2065) |
| **Sri Lanka** | LKA (SEARO) | 2040 (2037 to 2050) | 2038 (2036 to 2045) | 2032 (2032 to 2033) | 2040 (2037 to 2050) | 2040 (2037 to 2050) | 2033 (2032 to 2034) | 2036 (2035 to 2039) |
| **Lesotho** | LSO (AFRO) | 2064 (2046 to 2082) | 2058 (2043 to 2070) | 2036 (2034 to 2041) | 2064 (2046 to 2082) | 2064 (2046 to 2082) | 2036 (2034 to 2041) | 2043 (2039 to 2045) |
| **Morocco** | MAR (EMRO) | before 1980 (before 1980 to 1986) | before 1980 (before 1980 to 1986) | before 1980 (before 1980 to 1986) | before 1980 (before 1980 to 1986) | before 1980 (before 1980 to 1986) | before 1980 (before 1980 to 1986) | before 1980 (before 1980 to 1986) |
| **Moldova** | MDA (EURO) | 2039 (2037 to 2041) | 2039 (2037 to 2041) | 2039 (2037 to 2041) | 2039 (2037 to 2041) | 2039 (2037 to 2041) | 2039 (2037 to 2041) | 2039 (2037 to 2041) |
| **Madagascar** | MDG (AFRO) | 2081 (2070 to 2087) | 2068 (2061 to 2072) | 2035 (2035 to 2036) | 2081 (2070 to 2087) | 2081 (2070 to 2087) | 2035 (2035 to 2036) | 2044 (2043 to 2044) |
| **Marshall Islands** | MHL (WPRO) | 2040 (2038 to 2042) | 2040 (2038 to 2042) | 2040 (2038 to 2042) | 2040 (2038 to 2042) | 2040 (2038 to 2042) | 2040 (2038 to 2042) | 2040 (2038 to 2042) |
| **North Macedonia** | MKD (EURO) | 2031 (2017 to 2035) | 2031 (2017 to 2035) | 2031 (2017 to 2035) | 2031 (2017 to 2035) | 2031 (2017 to 2035) | 2031 (2017 to 2035) | 2031 (2017 to 2035) |
| **Mali** | MLI (AFRO) | 2051 (2045 to 2056) | 2047 (2042 to 2052) | 2034 (2034 to 2035) | 2051 (2045 to 2056) | 2051 (2045 to 2056) | 2035 (2034 to 2035) | 2041 (2039 to 2042) |
| **Myanmar** | MMR (SEARO) | 2058 (2050 to 2071) | 2056 (2050 to 2068) | 2042 (2037 to 2047) | 2058 (2050 to 2071) | 2058 (2050 to 2071) | 2042 (2037 to 2048) | 2044 (2042 to 2048) |
| **Mongolia** | MNG (WPRO) | 2025 (2021 to 2028) | 2025 (2021 to 2028) | 2025 (2021 to 2028) | 2026 (2021 to 2028) | 2026 (2021 to 2028) | 2025 (2021 to 2028) | 2025 (2021 to 2028) |
| **Mozambique** | MOZ (AFRO) | 2074 (2067 to 2080) | 2065 (2060 to 2069) | 2038 (2035 to 2041) | 2074 (2067 to 2080) | 2074 (2067 to 2080) | 2038 (2035 to 2041) | 2044 (2043 to 2044) |
| **Mauritania** | MRT (AFRO) | 2090 (2080 to after 2100) | 2080 (2072 to 2089) | 2052 (2049 to 2055) | 2090 (2080 to after 2100) | 2090 (2080 to after 2100) | 2053 (2049 to 2056) | 2054 (2050 to 2058) |
| **Malawi** | MWI (AFRO) | 2033 (2031 to 2037) | 2032 (2031 to 2034) | 2030 (2029 to 2031) | 2033 (2031 to 2037) | 2033 (2031 to 2037) | 2031 (2030 to 2031) | 2032 (2031 to 2034) |
| **Namibia** | NAM (AFRO) | 2031 (2027 to 2034) | 2031 (2027 to 2034) | 2029 (2026 to 2032) | 2031 (2027 to 2034) | 2031 (2027 to 2034) | 2030 (2027 to 2032) | 2031 (2027 to 2033) |
| **Niger** | NER (AFRO) | 2090 (2069 to after 2100) | 2080 (2064 to 2094) | 2055 (2048 to 2058) | 2090 (2069 to after 2100) | 2090 (2069 to after 2100) | 2055 (2048 to 2059) | 2058 (2049 to 2062) |
| **Nigeria** | NGA (AFRO) | after 2100 (2095 to after 2100) | 2091 (2085 to after 2100) | 2059 (2057 to 2064) | after 2100 (2095 to after 2100) | after 2100 (2095 to after 2100) | 2060 (2057 to 2065) | 2063 (2060 to 2069) |
| **Nicaragua** | NIC (PAHO) | 2004 (2004 to 2004) | 2004 (2004 to 2004) | 2004 (2004 to 2004) | 2004 (2004 to 2004) | 2004 (2004 to 2004) | 2004 (2004 to 2004) | 2004 (2004 to 2004) |
| **Nepal** | NPL (SEARO) | 2037 (2032 to 2044) | 2034 (2031 to 2038) | 2030 (2029 to 2031) | 2037 (2032 to 2044) | 2037 (2032 to 2044) | 2031 (2030 to 2032) | 2034 (2031 to 2036) |
| **Pakistan** | PAK (EMRO) | 2070 (2048 to 2090) | 2061 (2044 to 2075) | 2035 (2034 to 2041) | 2070 (2048 to 2090) | 2070 (2048 to 2090) | 2035 (2034 to 2041) | 2043 (2039 to 2045) |
| **Peru** | PER (PAHO) | 2008 (2008 to 2009) | 2008 (2008 to 2009) | 2008 (2008 to 2009) | 2008 (2008 to 2009) | 2008 (2008 to 2009) | 2008 (2008 to 2009) | 2008 (2008 to 2009) |
| **Philippines** | PHL (WPRO) | 2048 (2046 to 2050) | 2048 (2046 to 2050) | 2037 (2035 to 2039) | 2048 (2046 to 2050) | 2049 (2046 to 2050) | 2037 (2035 to 2039) | 2041 (2040 to 2042) |
| **Papua New Guinea** | PNG (WPRO) | 2075 (2068 to 2084) | 2075 (2068 to 2084) | 2051 (2045 to 2055) | 2075 (2068 to 2084) | 2075 (2068 to 2084) | 2052 (2045 to 2055) | 2053 (2047 to 2057) |
| **Korea, North** | PRK (SEARO) | 2039 (2036 to 2040) | 2039 (2036 to 2040) | 2039 (2036 to 2040) | 2039 (2036 to 2040) | 2039 (2036 to 2040) | 2039 (2036 to 2040) | 2039 (2036 to 2040) |
| **Paraguay** | PRY (PAHO) | 2053 (2040 to 2061) | 2048 (2037 to 2054) | 2033 (2032 to 2034) | 2053 (2040 to 2061) | 2053 (2040 to 2061) | 2034 (2033 to 2034) | 2040 (2036 to 2041) |
| **Rwanda** | RWA (AFRO) | 2041 (2035 to 2045) | 2036 (2033 to 2039) | 2030 (2030 to 2031) | 2041 (2035 to 2045) | 2041 (2035 to 2045) | 2032 (2031 to 2032) | 2035 (2033 to 2036) |
| **Sudan** | SDN (EMRO) | 2065 (2055 to 2073) | 2058 (2051 to 2063) | 2035 (2034 to 2035) | 2065 (2055 to 2073) | 2065 (2055 to 2073) | 2035 (2034 to 2035) | 2043 (2041 to 2043) |
| **Senegal** | SEN (AFRO) | 2039 (2035 to 2044) | 2039 (2035 to 2044) | 2034 (2031 to 2036) | 2039 (2035 to 2044) | 2039 (2035 to 2044) | 2034 (2032 to 2036) | 2037 (2034 to 2040) |
| **Solomon Islands** | SLB (WPRO) | 2043 (2039 to 2046) | 2043 (2039 to 2046) | 2036 (2034 to 2039) | 2043 (2039 to 2046) | 2043 (2039 to 2046) | 2036 (2034 to 2039) | 2039 (2037 to 2042) |
| **Sierra Leone** | SLE (AFRO) | 2071 (2063 to 2080) | 2066 (2060 to 2073) | 2050 (2047 to 2054) | 2071 (2063 to 2080) | 2071 (2063 to 2080) | 2050 (2047 to 2054) | 2051 (2047 to 2056) |
| **El Salvador** | SLV (PAHO) | 2020 (2020 to 2020) | 2020 (2020 to 2020) | 2020 (2020 to 2020) | 2020 (2020 to 2020) | 2020 (2020 to 2020) | 2020 (2020 to 2020) | 2020 (2020 to 2020) |
| **Somalia** | SOM (EMRO) | after 2100 (2085 to after 2100) | 2092 (2079 to after 2100) | 2061 (2057 to 2063) | after 2100 (2085 to after 2100) | after 2100 (2085 to after 2100) | 2062 (2057 to 2064) | 2066 (2059 to 2069) |
| **Serbia** | SRB (EURO) | 2018 (2010 to 2027) | 2018 (2010 to 2027) | 2018 (2010 to 2027) | 2018 (2010 to 2027) | 2018 (2010 to 2027) | 2018 (2010 to 2027) | 2018 (2010 to 2027) |
| **South Sudan** | SSD (AFRO) | after 2100 (2093 to after 2100) | 2095 (2085 to after 2100) | 2065 (2061 to 2068) | after 2100 (2093 to after 2100) | after 2100 (2093 to after 2100) | 2065 (2062 to 2069) | 2070 (2065 to 2073) |
| **Sao Tome and Principe** | STP (AFRO) | 2030 (2026 to 2034) | 2030 (2026 to 2034) | 2030 (2026 to 2034) | 2030 (2026 to 2034) | 2030 (2026 to 2034) | 2030 (2026 to 2034) | 2030 (2026 to 2034) |
| **Eswatini** | SWZ (AFRO) | 2040 (2033 to 2051) | 2037 (2032 to 2047) | 2031 (2030 to 2033) | 2040 (2033 to 2051) | 2040 (2033 to 2051) | 2032 (2031 to 2033) | 2035 (2032 to 2039) |
| **Syria** | SYR (EMRO) | 2058 (2054 to 2064) | 2055 (2050 to 2060) | 2036 (2035 to 2038) | 2058 (2054 to 2064) | 2058 (2054 to 2064) | 2036 (2035 to 2038) | 2042 (2041 to 2044) |
| **Chad** | TCD (AFRO) | after 2100 (2086 to after 2100) | 2094 (2078 to after 2100) | 2062 (2058 to 2065) | after 2100 (2086 to after 2100) | after 2100 (2086 to after 2100) | 2062 (2058 to 2066) | 2066 (2061 to 2070) |
| **Togo** | TGO (AFRO) | 2080 (2062 to 2097) | 2071 (2058 to 2084) | 2049 (2042 to 2053) | 2080 (2062 to 2097) | 2080 (2062 to 2097) | 2050 (2042 to 2053) | 2050 (2044 to 2055) |
| **Thailand** | THA (SEARO) | 2022 (2022 to 2022) | 2022 (2022 to 2022) | 2022 (2022 to 2022) | 2022 (2022 to 2022) | 2022 (2022 to 2022) | 2022 (2022 to 2022) | 2022 (2022 to 2022) |
| **Tajikistan** | TJK (EURO) | 2030 (2026 to 2032) | 2030 (2026 to 2032) | 2030 (2026 to 2032) | 2030 (2026 to 2032) | 2030 (2026 to 2032) | 2030 (2026 to 2032) | 2030 (2026 to 2032) |
| **Turkmenistan** | TKM (EURO) | 2033 (2030 to 2036) | 2033 (2030 to 2036) | 2033 (2030 to 2036) | 2033 (2030 to 2036) | 2033 (2030 to 2036) | 2033 (2030 to 2036) | 2033 (2030 to 2036) |
| **Timor-Leste** | TLS (SEARO) | 2042 (2037 to 2046) | 2042 (2037 to 2046) | 2033 (2031 to 2036) | 2042 (2037 to 2046) | 2042 (2037 to 2046) | 2034 (2032 to 2036) | 2038 (2035 to 2040) |
| **Tonga** | TON (WPRO) | 2043 (2040 to 2048) | 2043 (2040 to 2048) | 2043 (2040 to 2048) | 2043 (2040 to 2048) | 2043 (2040 to 2048) | 2043 (2040 to 2048) | 2043 (2040 to 2048) |
| **Tunisia** | TUN (EMRO) | 2032 (2013 to 2033) | 2032 (2013 to 2033) | 2030 (2013 to 2030) | 2032 (2013 to 2033) | 2032 (2013 to 2033) | 2030 (2013 to 2031) | 2032 (2013 to 2032) |
| **Tuvalu** | TUV (WPRO) | 2037 (2032 to 2039) | 2037 (2032 to 2039) | 2037 (2032 to 2039) | 2037 (2032 to 2039) | 2037 (2032 to 2039) | 2037 (2032 to 2039) | 2037 (2032 to 2039) |
| **Tanzania** | TZA (AFRO) | 2046 (2035 to 2068) | 2042 (2033 to 2056) | 2032 (2030 to 2033) | 2046 (2035 to 2068) | 2046 (2035 to 2068) | 2033 (2031 to 2034) | 2037 (2033 to 2041) |
| **Uganda** | UGA (AFRO) | 2050 (2046 to 2056) | 2047 (2044 to 2052) | 2035 (2034 to 2035) | 2050 (2046 to 2056) | 2050 (2046 to 2056) | 2035 (2034 to 2035) | 2041 (2039 to 2042) |
| **Ukraine** | UKR (EURO) | 2036 (2009 to 2040) | 2036 (2009 to 2040) | 2032 (2009 to 2033) | 2036 (2009 to 2040) | 2036 (2009 to 2040) | 2032 (2009 to 2033) | 2034 (2009 to 2037) |
| **Uzbekistan** | UZB (EURO) | 2036 (2034 to 2038) | 2036 (2034 to 2038) | 2036 (2034 to 2038) | 2036 (2034 to 2038) | 2036 (2034 to 2038) | 2036 (2034 to 2038) | 2036 (2034 to 2038) |
| **Venezuela** | VEN (PAHO) | 2030 (2018 to 2031) | 2030 (2018 to 2031) | 2028 (2018 to 2028) | 2030 (2018 to 2031) | 2030 (2018 to 2031) | 2029 (2018 to 2030) | 2030 (2018 to 2031) |
| **Viet Nam** | VNM (WPRO) | 2047 (2040 to 2051) | 2047 (2040 to 2051) | 2043 (2038 to 2047) | 2047 (2040 to 2051) | 2047 (2040 to 2051) | 2043 (2038 to 2047) | 2043 (2039 to 2047) |
| **Vanuatu** | VUT (WPRO) | 2057 (2052 to 2061) | 2057 (2052 to 2061) | 2054 (2049 to 2057) | 2057 (2052 to 2061) | 2057 (2052 to 2061) | 2054 (2049 to 2058) | 2055 (2049 to 2058) |
| **Samoa** | WSM (WPRO) | 2055 (2048 to 2060) | 2055 (2048 to 2060) | 2042 (2037 to 2045) | 2055 (2048 to 2060) | 2056 (2048 to 2060) | 2042 (2037 to 2045) | 2044 (2041 to 2045) |
| **Yemen** | YEM (EMRO) | 2056 (2044 to 2067) | 2051 (2040 to 2058) | 2033 (2032 to 2034) | 2056 (2044 to 2067) | 2056 (2044 to 2067) | 2034 (2033 to 2034) | 2040 (2037 to 2042) |
| **South Africa** | ZAF (AFRO) | 2072 (2052 to 2089) | 2063 (2049 to 2075) | 2038 (2034 to 2044) | 2072 (2052 to 2089) | 2072 (2052 to 2089) | 2038 (2034 to 2044) | 2044 (2041 to 2045) |
| **Zambia** | ZMB (AFRO) | 2024 (2024 to 2026) | 2024 (2024 to 2026) | 2024 (2024 to 2026) | 2024 (2024 to 2026) | 2024 (2024 to 2026) | 2024 (2024 to 2026) | 2024 (2024 to 2026) |
| **Zimbabwe** | ZWE (AFRO) | 2042 (2039 to 2047) | 2039 (2037 to 2043) | 2033 (2032 to 2033) | 2042 (2039 to 2047) | 2042 (2039 to 2047) | 2033 (2033 to 2034) | 2037 (2036 to 2039) |

# References

1. Nayagam, S.*, et al.* Requirements for global elimination of hepatitis B: a modelling study. *The Lancet Infectious Diseases* **16**, 1399–1408 (2016).

2. de Villiers, M.J.*, et al.* Modelling hepatitis B virus infection and impact of timely birth dose vaccine: A comparison of two simulation models. *PLOS ONE* **15**, e0237525 (2020).

3. Razavi-Shearer, D.*, et al.* Global prevalence, treatment, and prevention of hepatitis B virus infection in 2016: a modelling study. *The Lancet Gastroenterology & Hepatology* **3**, 383–403 (2018).

4. *Global hepatitis report 2017*, (World Health Organization, Geneva, 2017).

5. Combating hepatitis B and C to reach elimination by 2030. in *Advocacy Brief* (World Health Organization, Geneva, Switzerland, 2016).

6. World Health Statistics 2011. (World Health Organization, Geneva, Switzerland, 2011).

7. Cui, F.*, et al.* Prevention of Chronic Hepatitis B after 3 Decades of Escalating Vaccination Policy, China. *Emerging infectious diseases* **23**, 765-772 (2017).
